# Supplementary material for: A global inventory of historical documentary evidence related to climate since the 15th century
Source: Copernicus journal article supplement (doi:10.5194/cp-2021-165), 2021-12-02
Supplement: Supplementary file 1 [file cp-2021-165-supplement-version2.zip]

## Sheet: Global_Documentary_Inventory
Global Inventory of Historical Documentary Records related to Climate
Climate of the Past – April 2022
ID	Type	Climate Parameter	Resolution	Season/ Month	Start	End	Length (including gaps)	Inst. Extension Start	Inst. Extension End	Location	Country	Continent	WMO Region	Elevation	Lat	Lon	S-most Lat	N-most Lat	W-most Lon	E-most Lon	Coordinates origin	Reference coordinates	Source Type	Archives	Type of Evidence	Indicators/Predictors	Details	Climate Proxy	Calibration	Primary record series	Quantification	Contact	Reference	Data availability	Data location	General comment
1	p	precipitation	decadal		1599	1940	342		2008	Bermejo river catchment, northern Argentina	Argentina	South America	3				-20	-25	-66	-58	2	catchment	Jesuit documents, reports by the governors and military officials, manuscripts written by priests, diaries of soldiers, explorers, adventurers, and later, traders, Old maps, newspapers	Archivo General de las Indias; Archivo de la Real Academia de la Historia (Madrid); Archivo de la Biblioteca Nacional (Buenos Aires); Biblioteca Nacional de Chile; Archivo General de la Nación (Buenos Aires)	reports of hydrological and meteorological extremes affecting the regional economy,	Bermejo river depth series	five-point ordinal index: -2,2 = Very low flow, low flow, normal flooding, large swells, exceptional floods	river depth series	direct observed	yes	i	mrprieto@mendoza-conicet.gob.ar	Prieto, María del Rosario, and F. Rojas. “Determination of Droughts and High Floods of the Bermejo River (Argentina) Based on Documentary Evidence (17th to 20th Century).” Journal of Hydrology 529 (2015): 676–83.	*	printed in paper
2	p	precipitation	annual		1540	1848	309		2006	Santiago de Chile	Chile	South America	3		-33.4489	-70.6693					1	Santiago de Chile						precipitation index	direct observed	yes	i		Taulis, E. 1934. De la distribution des pluies au Chili, Materiaux pour l'étude des calamités, 33, 3-20.	x	https://www.ncdc.noaa.gov/paleo-search/study/8701
3	p	precipitation	annual		1548	1810	263		2005	Tucuman	Argentina	South America	3		-26.8083	-65.2176					1	Tucuman						precipitation index	direct observed	yes	i	mrprieto@lab.cricyt.edu.ar	Prieto, M.R., R. Herrera, and P. Dussel. 2000. Archival evidence for some aspects of historical climate variability in Argentina and Bolivia during the 17th and 18th centuries. in Southern Hemisphere Paleo and Neo-Climates: Methods and Concepts, edited by P.P. Smolka and W. Volkheimer, pp. 127-142, Springer, Berlin.	x	https://www.ncdc.noaa.gov/paleo-search/study/8702
4	p	precipitation	annual		1585	1814	230	1902	2005	Potosi	Bolivia	South America	3		-19.5723	-65.755					1	Potosi	chronologies, government documents	Bolivia (Archivo y Biblioteca Nacionales de Bolivia de Sucre; Archivo Histórico de la Casa de Moneda de Potosí; Archivo Histórico de Cochabamba, Archivo Histórico de La Paz), Argentina (Archivo General de la Nación), Spain (Archivo General de Indias de Séville Archivo de la Real Academia de la Historia de Madrid; Archivo del Museo de la Marina de Madrid; Archivo de la Biblioteca Nacional de Madri…	chronology of Bartolomé Arzáns (1705-1737) covering 1545-1737; accounts on water resources and harvest losses (1784-1810) imposed by king Charles III	prices of agriculture products on markets and explanations of economical crisis for Andean puna grassland, particularly Potosi and La Paz	five-point ordinal precipitation index: -2/2 = très sec, sec, normal, pluvieux, tres pluvieux	precipitation index	direct observed	yes	i	gioda_ird@yahoo.com	Gioda, A. “Para una Historia Climática de La Paz en los Últimos Cinco Siglos.” Revista de La Coordinadora de Historia 3 (1999): 13–33.; Gioda, A., and María del Rosario Prieto. “Histoire des sécheresses andines. Potosí, El Niño et le petit age glaciaire.” La Météorologie 8 (1999): 33–42.	x	https://www.ncdc.noaa.gov/paleo-search/study/8703	Neukom data has different time period: 1585-1814 (-2005)
5	p	precipitation	annual, decadal		1590	1805	216	1902	1994	Parana	Argentina	South America	3		-31.7413	-60.5115					1	Parana	Actas Capitulares (written records of the weekly meetings); old maps of the region, reports from annals, chronicles, priests’ and travelers’ descriptions, reports by visiting priests on a mission, reports by government officers sent to the Crown	Archivo General de Indias, Sevilla; Archivo General de la Nación Argentina ; Real Academia de la Historia–Madrid	reports of political, economic, agricultural, social and climatic events	Paraná River runoff	runoff index: 3=exceptional flood, 2=flood,1=large swelling;	river runoff series	direct observed	yes	i	mrprieto@mendoza-conicet.gob.ar	Prieto, María del Rosario. “ENSO Signals in South America: Rains and Floods in the Paraná River Region during Colonial Times.” Climatic Change 83 (2007): 39–54.	x	https://www.ncdc.noaa.gov/paleo-search/study/8703
6	p	precipitation	annual, decadal		1590	1805	216	1902	2006	Santa Fe/Corrientes	Argentina	South America	3		-31.6107	-60.6973					1	Santa Fe	Actas Capitulares (written records of the weekly meetings); old maps of the region, reports from annals, chronicles, priests’ and travelers’ descriptions, reports by visiting priests on a mission, reports by government officers sent to the Crown	Archivo General de Indias, Sevilla; Archivo General de la Nación Argentina ; Real Academia de la Historia–Madrid	reports of political, economic, agricultural, social and climatic events	Santa Fe/Corrientes precipitation	five-point ordinal index: -2,2=very dry,dry, normal, wet, very wet	precipitation index	direct observed	yes	i	mrprieto@mendoza-conicet.gob.ar	Prieto, María del Rosario. “ENSO Signals in South America: Rains and Floods in the Paraná River Region during Colonial Times.” Climatic Change 83 (2007): 39–54.	x	https://www.ncdc.noaa.gov/paleo-search/study/8703
7	p	precipitation	annual, decadal	NDJFM	1600	1960	361		2000	Mendoza	Argentina	South America	3		-32.8884	-68.8388					1	Mendoza City	Actas Capitulares, administrative, notarial and ecclesiastic archives; newspaper libraries economic, social, political and climatic events of Mendoza City, reports from travelers, merchants or postmen, private accounts	Archivo Histórico de Mendoza, the Archivo General de la Nación (Argentina) and the Archivo General de lndias in Seville	References to swellings, floods and water scarcity	fluctuation of flow volume of Mendoza River, calibrated with tree-rings	five-point ordinal index: -2,2 = extraordinary streamflow, large streamflow, regular streamflow, low streamflow, extremely low streamflow; calibrated with tree-rings	streamflow index	direct observed	yes	i	mrprieto@mendoza-conicet.gob.ar	Prieto, María del Rosario et al. “Historical Evidences of the Mendoza River Streamflow Fluctuations and Their Relationship with ENSO.” The Holocene 9 (1999): 472–81.	x	https://www.ncdc.noaa.gov/paleo-search/study/8704	index time series in paper covers 1600-1960 but the one in the dataset is 1700-2000
8	p	precipitation	annual		1600	1806	207		1985	Mendoza	Argentina	South America	3		-32.8884	-68.8388					1	Mendoza City	Actas Capitulares, administrative, notarial and ecclesiastic archives; newspaper libraries economic, social, political and climatic events of Mendoza City, reports from travelers, merchants or postmen, private accounts, logbooks from Spanish ships	Archivo General de Indias (AGI) in Seville,	Specific reports on climatic events, general descriptions about precipitation regimes, seasonal weather characteristics and streamflow, records of the town council, account books or books on harvest expenditures, notes provided by the "haciendas" (ranch or farm), instructions about food supplies, compilations of agricultural products and cattle prices, lawsuits for land possession	delayed or anticipated harvests (particularly grapevine and wheat)	five-point ordinal index: -2,2 = very wet, wet, normal, dry, very dry	precipitation index	direct observed	yes	i	mrprieto@lab.cricyt.edu.ar	Prieto, M.R., R. Herrera, and P. Dussel. 2000. Archival evidence for some aspects of historical climate variability in Argentina and Bolivia during the 17th and 18th centuries. in Southern Hemisphere Paleo and Neo-Climates: Methods and Concepts, edited by P.P. Smolka and W. Volkheimer, pp. 127-142, Springer, Berlin.	x	https://www.ncdc.noaa.gov/paleo-search/study/8705
9	p	precipitation	annual		1700	1806	107		2005	Cordoba	Argentina	South America	3		-31.4201	-64.1888					1	Cordoba City						precipitation index	direct observed	yes	i	mrprieto@lab.cricyt.edu.ar	Prieto, M.R., and R. Herrera. 2001. De sequías, hambrunas, plagas y "otras varias y continuas calamidades acaecidas en la Jurisdicción de Córdoba" durante el siglo XVIII, Serie Economía y Sociedad. Cuadernos de Historia, 4, 131-158.	x	https://www.ncdc.noaa.gov/paleo-search/study/8706
10	p	precipitation	annual		1750	1921	172		1977	Dulce river	Argentina	South America	3		-27.4986	-64.8605					1	Termas de Río Hondo	Actas Capitulares from the town of Santiago del Estero	Archivo General de Indias (AGI) in Seville, Archivo Nacional de Bolivia (National Archive ofBolivia) and Archivo General de la Nación Argentina (General Archive of the Argentinean Nation)	descriptions of flooding (magnitude, duration, extension of the flooded area and water height), deaths of livestock due to pasture flooding, reports of isolation of villages and towns, destruction of buildings, roads, bridges and public works, and crop plagues	production of livestock and cereal as an indicator of droughts	Dulce river runoff series	river runoff series	direct observed	yes	i	rgarciah@ucm.es	Herrera, R., M.R. Prieto, and R. García-Herrera. 2003. Floods in the semiarid Argentinean Chaco during the 17th to 19th centuries, in Proceedings of Palaeofloods, Historical Data & Climatic Variability: Applications in Flood Risk Assessment, edited by V. R. Thorndycraft, et al., pp. 107-112, CSIC-Centro de Ciencias Medioambientales, Madrid.	x	https://www.ncdc.noaa.gov/paleo-search/study/8707
11	p	precipitation	annual		1750	1921	172		2005	Santiago del Estero	Argentina	South America	3		-27.7834	-64.2642					1	Santiago del Estero	Actas Capitulares from the town of Santiago del Estero	Archivo General de Indias (AGI) in Seville, Archivo Nacional de Bolivia (National Archive ofBolivia) and Archivo General de la Nación Argentina (General Archive of the Argentinean Nation)	descriptions of flooding (magnitude, duration, extension of the flooded area and water height), deaths of livestock due to pasture flooding, reports of isolation of villages and towns, destruction of buildings, roads, bridges and public works, and crop plagues	production of livestock and cereal as an indicator of droughts	Santiago del Estero precipitation index	precipitation index	direct observed	yes	i	rgarciah@ucm.es	Herrera, R., M.R. Prieto, and R. García-Herrera. 2003. Floods in the semiarid Argentinean Chaco during the 17th to 19th centuries, in Proceedings of Palaeofloods, Historical Data & Climatic Variability: Applications in Flood Risk Assessment, edited by V. R. Thorndycraft, et al., pp. 107-112, CSIC-Centro de Ciencias Medioambientales, Madrid.	x	https://www.ncdc.noaa.gov/paleo-search/study/8708
12	p	precipitation	annual	boreal summer	1760	1889	130		1996	Central Andes	Argentina	South America	3		-32.8253	-70.0831					1	Uspallata Pass (Paso de la Cumbre)	Actas Capitulares (written records of the weekly meetings); records of the Sala de Representantes de Mendoza (Representative House of Mendoza) meetings and military reports		written records of the weekly meetings and military reports	record of pass closure and opening: this happened when more than 60 cm of snow had accumulated along the pass	annual chronology of snowfall in the Argentinean–Chilean Central Andes in four categories: −1: scarce; 0: normal; 1: abundant; 2: very abundant.	snow depth series	direct observed	yes	i	mrprieto@lab.cricyt.edu.ar	Prieto, M. del R. & García Herrera, R. Documentary sources from South America: Potential for climate reconstruction. Palaeogeogr. Palaeoclimatol. Palaeoecol. 281, 196–209 (2009).; updated version of: Prieto, M.R., R. Herrera, and P. Dussel. 1999. Snowfall and floods in the oriental slope of Argentinean-Chilean Andes from the Middle of the 18th century to the End the 19th century. Its relationship…	x	https://www.ncdc.noaa.gov/paleo-search/study/8709
13	p	precipitation	decadal		1600	1870	271			Valley of Mexico; Mexico City	Mexico	North America	4		19.4326	-99.1332					1	Mexico City	books of the civil and ecclesiastical files	not specified	rogation ceremonies	rain ceremonies (pro pluvia)	lack of rain ceremonies = drought, normal years constantly recorded	drought catalog	cultural	yes	e	gustavogarza@hotmail.com	Garza Merodio, Gustavo G. “Climatología Histórica: Las Ciudades Mexicanas ante la Sequía (Siglos XVII al XIX).” Investigaciones Geográficas (2007): 77–92.; Garza Merodio, Gustavo G. “Frecuencia y Duración de Sequías en la Cuenca de México de Fines del Siglo XVI a Mediados del XIX.” Investigaciones Geográficas (2002): 106–15.	*	printed in paper
14	p	precipitation	decadal		1450	1900	451			central Mexico	Mexico	North America	4				18	21	-100.5	-97	2	region	pictographic codexes and annals (some even pre-Columbian times), main sources: archives, chronicles, old newspapers, iconographical and bibliographical material	not specified	events that are associated with hydrometeorological phenomena or hazards	Frost, hailstorm, and hurricane records, information about water scarcity or surplus (droughts and floods)	catalog of agricultural disasters associated with hydrometeorological phenomena or hazards	drought catalog	direct observed	yes	e	blanca@tonatiuh.igeofcu.unam.mx	García-Acosta, Virginia et al. “Desastres Agrícolas en México. Catálogo histórico, I. Época prehispánica y Colonia (958-1822)." Fondo de Cultura Económica and CIESAS Catálogo histórico (2003), 506.; Mendoza, Blanca et al. “Historical Droughts in Central Mexico and Their Relation with El Niño.” Journal of Applied Meteorology 44 (2005): 709; Mendoza, Blanca et al. "A Study of Historical Droughts in…	*	printed in paper
15	p	precipitation	annual		1502	1900	399			Yucatan Peninsula	Mexico	North America	4				17.8	21.6	-92.4	-86.7	2	region	codices (pre-Columbian and Colonial), chronicles (Colonial), Personal diaries (eighteenth and nineteenth centuries), foreign travellers’ writings (eighteenth to twentieth centuries), and works from historians and scientists (nineteenth to twentieth centuries), newspapers, Iconographical sources	near 50 Mexican archives + Archivo General de Indias, Spain and Archivo General de Centroamérica, Guatemala)	events associated with hydrometeorological phenomena or hazards	agricultural disasters; including drought catalogues García-Acosta et al. (2003), Escobar (2004), Farriss (1992), Bracamonte (1994)	Historical drought time series for Yucatan peninsula	drought time series	direct observed, indirect organic	yes	ts	blanca@tonatiuh.igeofcu.unam.mx	Mendoza, Blanca et al. “Frequency and Duration of Historical Droughts from the 16th to the 19th Centuries in the Mexican Maya Lands, Yucatan Peninsula.” Climatic Change 83 (2007): 151–68.	*	printed in paper
16	p	precipitation	annual	MJJASO	1640	1945	306			Pacific coast of Central America	Guatemala	North America	4	1520	14.6284	-90.5227					0		city and municipal council meeting documents from Santiago de Guatemala (now Antigua Guatemala) and Guatemala de la Asunción (now Guatemala City)	Archivo Histórico de la Municipalidad de Antigua Guatemala (AHMAG) and the Archivo General de Centro América (AGCA) in Guatemala City	information relating to Catholic rogation ceremonies and reports of flooding events and crop shortages		five-point ordinal annual rainy season (May to October) index: very dry = −2, dry = −1, normal = 0, wet = +1 and very wet = +2	precipitation index	cultural, direct observed, indirect organic	yes	i	alvaro.guevara.2012@my.bristol.ac.uk	Guevara-Murua, Alvaro et al. “300 years of hydrological records and societal responses to droughts and floods on the Pacific coast of Central America.” Climate of the Past 14 (2018): 175-191.	x	https://www.ncdc.noaa.gov/paleo-search/study/22772
17	w	wind	annual		1590	1750	161			Acapulco-Philippines	Southern Pacific Ocean			0			14.583	16.85	-99.916	120.95	0		logbooks of the Manila galleon fleet	Archivo General de Indias (General Archive of the Indies, Seville, Spain)		departure and arrival times, cargo, route, duration of voyage depends on strength of the trade winds and the position of the western Pacific monsoon trough		ship voyage duration series	direct observed, measured	yes	ts	rgarcia@ucar.edu	Garcia, Rolando R. et al. “Atmospheric Circulation Changes in the Tropical Pacific Inferred from the Voyages of the Manila Galleons in the Sixteenth–Eighteenth Centuries.” Bulletin of the American Meteorological Society 82 (2001): 2435–55.	x	https://www.ncdc.noaa.gov/paleo/study/5413
18	t	temperature	decadal	boreal winter	1470	1940	471			Guangdong	China	Asia	2	3900	23.16	113.23					0		paper not available	paper not available	paper not available	paper not available	paper not available	temperature reconstruction	paper not available		i		Zheng, S.-Z. "Climate in the Little Ice Age and its effects in Guangdong, China." Chinese Science Bulletin 27 (1982): 302–304.	x	https://www.ncdc.noaa.gov/paleo-search/study/22831
19	p	precipitation	annual		1470	1979	510			China	China	Asia	2				18	53	73.5	134.5	2	China according to Wang et al. 2018 (REACHES)	more than 2200 local annals/gazettes and many other historical writings from provinces and counties	book not available	Yearly Charts of Dryness/Wetness based on qualitative descriptions	dryness/wetness references	dryness/wetness of each year in 5 grades: grade 1. very wet; grade 2, wet, grade; grad 3. normal; grade 4. dry, and grade 5. very dry.	dryness-wetness index	direct observed	no	i		Academy of Meteorological Science of China Central Meteorological Administration (CMA). Yearly Charts of Dryness/Wetness in China for the Last 500 Years. Beijing: Cartographic Publishing House, 1981.; Zhang, D., X. Li, and Y. Liang. Supplement of Yearly Charts of Dryness/Wetness in China for the Last 500-year Period, 1993 – 2000, Journal of Applied Meteorological Science 14 (2003): 379-389.			This is the book: https://www.chinascientificbooks.com/yearly-charts-of-drynesswetness-in-china-for-the-last-500year-period-p-999/
20	p	precipitation	seasonal		1470	1950	481			China	China	Asia	2				34.38	38.27	114.93	122.7	1	province shandong	local gazettes and historical drought/flood archives	paper not available		drought/flood reports from 85 stations across China		seasonal dry/wet index	paper not available		i	zhengjy@igsnrr.ac.cn	Zheng, J.Y. and Zheng S. “A new approach of reconstruction the dryness/wetness index series in China during historical times by using the number of drought/flood counties”. Geographic Research 12 (1993): 1-9. (in Chinese) paper not available
21	p	precipitation	decadal		1470	1950	481			China	China	Asia	2				34.38	38.27	114.93	122.7	1	province shandong	local gazettes and historical drought/flood archives	paper not available		drought/flood reports from 85 stations across China		temperature index	paper not available		i	zhengjy@igsnrr.ac.cn	Zheng, J.Y. and Zheng S. “A new approach of reconstruction the dryness/wetness index series in China during historical times by using the number of drought/flood counties”. Geographic Research 12 (1993): 1-9. (in Chinese) paper not available
22	p	precipitation	annual	NDJFM	1644	1911	268			southern China	China	Asia	2				18	24	100	114	2	based on graph in article	original records collected from 7,930 official documents, local chronicles, and private notes; Compendium records (Zhang, ed., 1st Edition 2004 and 2nd Edition 2013)	not specified	reports on all sorts of climate related events	crops, pests; description of precipitation; famine, disease	annual, winter and summer precipitation indices raging from 2 (excessive prcp), 1 (light to moderate prcp ), 0 (normal or average), to -1 (deficit prcp) and -2 (serious drought)	precipitation index	direct observed	yes	i	pkwang@gate.sinica.edu.tw	Wang, P.K., et al. "Construction of the REACHES Climate Database Based on Historical Documents of China". Scientific Data 5 (2018): 180288.	x	https://www.ncdc.noaa.gov/paleo-search/study/23410	indices are not published yet
23	p	precipitation	annual	MJJAS	1644	1911	268			central-eastern China	China	Asia	2				23	34	98	122.7	2	based on graph in article	original records collected from 7,930 official documents, local chronicles, and private notes; Compendium records (Zhang, ed., 1st Edition 2004 and 2nd Edition 2013)	not specified	reports on all sorts of climate related events	crops, pests; description of precipitation; famine, disease	annual, winter and summer precipitation indices raging from 2 (excessive prcp), 1 (light to moderate prcp ), 0 (normal or average), to -1 (deficit prcp) and -2 (serious drought)	precipitation index	direct observed	yes	i	pkwang@gate.sinica.edu.tw	Wang, P.K., et al. "Construction of the REACHES Climate Database Based on Historical Documents of China". Scientific Data 5 (2018): 180288.	x	https://www.ncdc.noaa.gov/paleo-search/study/23411	indices are not published yet
24	p	precipitation	annual	NDJFM	1644	1911	268			north-eastern China	China	Asia	2				34	42	103	122.7	2	based on graph in article	original records collected from 7,930 official documents, local chronicles, and private notes; Compendium records (Zhang, ed., 1st Edition 2004 and 2nd Edition 2013)	not specified	reports on all sorts of climate related events	crops, pests; description of precipitation; famine, disease	annual, winter and summer precipitation indices raging from 2 (excessive prcp), 1 (light to moderate prcp ), 0 (normal or average), to -1 (deficit prcp) and -2 (serious drought)	precipitation index	direct observed	yes	i	pkwang@gate.sinica.edu.tw	Wang, P.K., et al. "Construction of the REACHES Climate Database Based on Historical Documents of China". Scientific Data 5 (2018): 180288.	x	https://www.ncdc.noaa.gov/paleo-search/study/23412	indices are not published yet
25	p	precipitation	annual	MJJAS	1644	1911	268			southern China	China	Asia	2				18	24	100	114	2	based on graph in article	original records collected from 7,930 official documents, local chronicles, and private notes; Compendium records (Zhang, ed., 1st Edition 2004 and 2nd Edition 2013)	not specified	reports on all sorts of climate related events	crops, pests; description of precipitation; famine, disease	annual, winter and summer precipitation indices raging from 2 (excessive prcp), 1 (light to moderate prcp ), 0 (normal or average), to -1 (deficit prcp) and -2 (serious drought)	precipitation index	direct observed	yes	i	pkwang@gate.sinica.edu.tw	Wang, P.K., et al. "Construction of the REACHES Climate Database Based on Historical Documents of China". Scientific Data 5 (2018): 180288.	x	https://www.ncdc.noaa.gov/paleo-search/study/23413	indices are not published yet
26	p	precipitation	annual	NDJFM	1644	1911	268			central-eastern China	China	Asia	2				23	34	98	122.7	2	based on graph in article	original records collected from 7,930 official documents, local chronicles, and private notes; Compendium records (Zhang, ed., 1st Edition 2004 and 2nd Edition 2013)	not specified	reports on all sorts of climate related events	crops, pests; description of precipitation; famine, disease	annual, winter and summer precipitation indices raging from 2 (excessive prcp), 1 (light to moderate prcp ), 0 (normal or average), to -1 (deficit prcp) and -2 (serious drought)	precipitation index	direct observed	yes	i	pkwang@gate.sinica.edu.tw	Wang, P.K., et al. "Construction of the REACHES Climate Database Based on Historical Documents of China". Scientific Data 5 (2018): 180288.	x	https://www.ncdc.noaa.gov/paleo-search/study/23414	indices are not published yet
27	p	precipitation	annual	MJJAS	1644	1911	268			north-eastern China	China	Asia	2				34	42	103	122.7	2	based on graph in article	original records collected from 7,930 official documents, local chronicles, and private notes; Compendium records (Zhang, ed., 1st Edition 2004 and 2nd Edition 2013)	not specified	reports on all sorts of climate related events	crops, pests; description of precipitation; famine, disease	annual, winter and summer precipitation indices raging from 2 (excessive prcp), 1 (light to moderate prcp ), 0 (normal or average), to -1 (deficit prcp) and -2 (serious drought)	precipitation index	direct observed	yes	i	pkwang@gate.sinica.edu.tw	Wang, P.K., et al. "Construction of the REACHES Climate Database Based on Historical Documents of China". Scientific Data 5 (2018): 180288.	x	https://www.ncdc.noaa.gov/paleo-search/study/23415	indices are not published yet
28	t	temperature	annual	NDJFM	1644	1911	268			southern China	China	Asia	2				18	24	100	114	2	based on graph in article	original records collected from 7,930 official documents, local chronicles, and private notes; Compendium records (Zhang, ed., 1st Edition 2004 and 2nd Edition 2013)	not specified	reports on all sorts of climate related events	crops, pests; famine, disease; description of temperature	annual, winter and summer temperature indices raging from -2 (very cold), -1 (cold), 0 (normal or average condition), to 1 (warm) for temperature\	temperature index	direct observed	yes	i	pkwang@gate.sinica.edu.tw	Wang, P.K., et al. "Construction of the REACHES Climate Database Based on Historical Documents of China". Scientific Data 5 (2018): 180288.	x	https://www.ncdc.noaa.gov/paleo-search/study/23416	indices are not published yet
29	t	temperature	annual	MJJAS	1644	1911	268			central-eastern China	China	Asia	2				23	34	98	122.7	2	based on graph in article	original records collected from 7,930 official documents, local chronicles, and private notes; Compendium records (Zhang, ed., 1st Edition 2004 and 2nd Edition 2013)	not specified	reports on all sorts of climate related events	crops, pests; famine, disease; description of temperature	annual, winter and summer temperature indices raging from -2 (very cold), -1 (cold), 0 (normal or average condition), to 1 (warm) for temperature\	temperature index	direct observed	yes	i	pkwang@gate.sinica.edu.tw	Wang, P.K., et al. "Construction of the REACHES Climate Database Based on Historical Documents of China". Scientific Data 5 (2018): 180288.	x	https://www.ncdc.noaa.gov/paleo-search/study/23417	indices are not published yet
30	t	temperature	annual	NDJFM	1644	1911	268			north-eastern China	China	Asia	2				34	42	103	122.7	2	based on graph in article	original records collected from 7,930 official documents, local chronicles, and private notes; Compendium records (Zhang, ed., 1st Edition 2004 and 2nd Edition 2013)	not specified	reports on all sorts of climate related events	crops, pests; famine, disease; description of temperature	annual, winter and summer temperature indices raging from -2 (very cold), -1 (cold), 0 (normal or average condition), to 1 (warm) for temperature\	temperature index	direct observed	yes	i	pkwang@gate.sinica.edu.tw	Wang, P.K., et al. "Construction of the REACHES Climate Database Based on Historical Documents of China". Scientific Data 5 (2018): 180288.	x	https://www.ncdc.noaa.gov/paleo-search/study/23418	indices are not published yet
31	t	temperature	annual	MJJAS	1644	1911	268			southern China	China	Asia	2				18	24	100	114	2	based on graph in article	original records collected from 7,930 official documents, local chronicles, and private notes; Compendium records (Zhang, ed., 1st Edition 2004 and 2nd Edition 2013)	not specified	reports on all sorts of climate related events	crops, pests; famine, disease; description of temperature	annual, winter and summer temperature indices raging from -2 (very cold), -1 (cold), 0 (normal or average condition), to 1 (warm) for temperature\	temperature index	direct observed	yes	i	pkwang@gate.sinica.edu.tw	Wang, P.K., et al. "Construction of the REACHES Climate Database Based on Historical Documents of China". Scientific Data 5 (2018): 180288.	x	https://www.ncdc.noaa.gov/paleo-search/study/23419	indices are not published yet
32	t	temperature	annual	NDJFM	1644	1911	268			central-eastern China	China	Asia	2				23	34	98	122.7	2	based on graph in article	original records collected from 7,930 official documents, local chronicles, and private notes; Compendium records (Zhang, ed., 1st Edition 2004 and 2nd Edition 2013)	not specified	reports on all sorts of climate related events	crops, pests; famine, disease; description of temperature	annual, winter and summer temperature indices raging from -2 (very cold), -1 (cold), 0 (normal or average condition), to 1 (warm) for temperature\	temperature index	direct observed	yes	i	pkwang@gate.sinica.edu.tw	Wang, P.K., et al. "Construction of the REACHES Climate Database Based on Historical Documents of China". Scientific Data 5 (2018): 180288.	x	https://www.ncdc.noaa.gov/paleo-search/study/23420	indices are not published yet
33	t	temperature	annual	MJJAS	1644	1911	268			north-eastern China	China	Asia	2				34	42	103	122.7	2	based on graph in article	original records collected from 7,930 official documents, local chronicles, and private notes; Compendium records (Zhang, ed., 1st Edition 2004 and 2nd Edition 2013)	not specified	reports on all sorts of climate related events	crops, pests; famine, disease; description of temperature	annual, winter and summer temperature indices raging from -2 (very cold), -1 (cold), 0 (normal or average condition), to 1 (warm) for temperature\	temperature index	direct observed	yes	i	pkwang@gate.sinica.edu.tw	Wang, P.K., et al. "Construction of the REACHES Climate Database Based on Historical Documents of China". Scientific Data 5 (2018): 180288.	x	https://www.ncdc.noaa.gov/paleo-search/study/23421	indices are not published yet
34	t	temperature	decadal		1380	1890	511		1990	Cental China	China	Asia	2		29	113					0		paper not available	paper not available	cold/warm records	paper not available	temperature index for Central China	temperature index	paper not available		i		Wang, S.L. et al. “Climate in China during the Little Ice Age.” Quaternary Sciences 18 (1998): 54–64.; paper not available	x	https://www.ncdc.noaa.gov/paleo-search/study/22830
35	t	temperature	decadal		1380	1890	511		1990	East China	China	Asia	2		34	120					0		paper not available	paper not available	cold/warm records	paper not available	temperature index for East China region	temperature index	paper not available		i		Wang, S.L. et al. “Climate in China during the Little Ice Age.” Quaternary Sciences 18 (1998): 54–64.; paper not available	x	https://www.ncdc.noaa.gov/paleo-search/study/22830
36	t	temperature	decadal		1380	1890	511		1990	South China	China	Asia	2		23	114					0		paper not available	paper not available	cold/warm records	paper not available	temperature index for South China	temperature index	paper not available		i		Wang, S.L. et al. “Climate in China during the Little Ice Age.” Quaternary Sciences 18 (1998): 54–64.; paper not available	x	https://www.ncdc.noaa.gov/paleo-search/study/22830
37	t	temperature	decadal		1380	1890	511		1990	Fujian, Taiwan	China	Asia	2		24	121					0		paper not available	paper not available	cold/warm records	paper not available	temperature index for Fujian and Taiwan	temperature index	paper not available		i		Wang, S.L. et al. “Climate in China during the Little Ice Age.” Quaternary Sciences 18 (1998): 54–64.; paper not available	x	https://www.ncdc.noaa.gov/paleo-search/study/22830
38	t	temperature	30 years	ONDJFMA	1505	1995	491			central region of eastern China	China	Asia	2				31	38	110	130	0			Zhang et al., 2002; Chu and Wan, 1973	phenological records from both historical and modern times, historical weather records	date of the first and last frost and snow; duration of frost and snow; duration of river, lake and sea freeze-up and thaw dates; the distribution and its northern boundary of crops (e.g., tea, bamboo); the spatial-temporal distribution of farming and farming systems; impact evidence: historical weather records frequency and intensity of cold and warm events in winter half-year (October to April) …	reconstructed winter half-year (October-April) temperature anomalies	reconstructed temperature	indirect organic, direct observed	no	r	geqs@igsnrr.ac.cn	Ge, Q.S. et al. “Winter Half-Year Temperature Reconstruction for the Middle and Lower Reaches of the Yellow River and Yangtze River, China, during the Past 2000 Years.” The Holocene 13 (2003): 933–40.	x	https://www.ncdc.noaa.gov/paleo-search/study/6314
39	t	temperature	decadal	ONDJFMA	1505	1995	491			central region of eastern China	China	Asia	2				31	38	110	130	0			Zhang et al., 2002; Chu and Wan, 1973	phenological records from both historical and modern times, historical weather records	date of the first and last frost and snow; duration of frost and snow; duration of river, lake and sea freeze-up and thaw dates; the distribution and its northern boundary of crops (e.g., tea, bamboo); the spatial-temporal distribution of farming and farming systems; impact evidence: historical weather records frequency and intensity of cold and warm events in winter half-year (October to April) …	reconstructed winter half-year (October-April) temperature anomalies	reconstructed temperature	indirect organic, direct observed	no	r	geqs@igsnrr.ac.cn	Ge, Q.S. et al. “Winter Half-Year Temperature Reconstruction for the Middle and Lower Reaches of the Yellow River and Yangtze River, China, during the Past 2000 Years.” The Holocene 13 (2003): 933–40.	x	https://www.ncdc.noaa.gov/paleo-search/study/6314
40	t	temperature	annual	DJF	1736	2007	272			middle and lower reaches of the Yangtze River	China	Asia	2				24	34	108	123	0		memos-to-emperor produced by governmental officers during the Qing Dynasty		Yu Xue Fen Cun (Records of Rainfall Infiltration and Snowfall) from 273 administrative sites	rain infiltration depth measurements from the dry-wet soil boundary layer to the ground surface; depth on the surface after snowfall for each precipitation event	reconstructed winter (December-February) temperatures	reconstructed temperature	indirect inorganic	no	r	geqs@igsnrr.ac.cn	Hao, Z.X. et al. “Winter Temperature Variations over the Middle and Lower Reaches of the Yangtze River since 1736 AD.” Climate of the Past 8 (2012): 1023–30	x	will be published in Documentary Proxy Dataset, for now contact angela-maria.burgdorf@giub.unibe.ch
41	p	precipitation	annual	DJF	1736	1911	176	1951	2000	Shijiazhuang	China	Asia	2		38.0428	114.515					1	Shijiazhuang	Memos-to-Emperor during the Qing Dynasty (1644-1911)	Chinese First Historical Archive at Beijing Palace Museum	Yu Xue Fen Cun (Records of Rainfall Infiltration and Snowfall) from 273 administrative sites	rain infiltration depth measurements from the dry-wet soil boundary layer to the ground surface; depth on the surface after snowfall for each precipitation event	reconstructed winter (December-February) precipitation (mm)	precipitation reconstruction	indirect inorganic	no	r	wcwang@albany.edu	Ge, Q.S. et al. “Reconstruction of Historical Climate in China, High-Resolution Precipitation Data from Qing Dynasty Archives.” Bulletin of the American Meteorological Society 86 (2005): 671–79.	x	will be published in Documentary Proxy Dataset, for now contact angela-maria.burgdorf@giub.unibe.ch	not mentioned in paper which month are meant by "summer" and "winter", DJF and JJA are assumed
42	p	precipitation	annual	JJA	1736	1911	176	1951	2000	Shijiazhuang	China	Asia	2		38.0428	114.515					1	Shijiazhuang	Memos-to-Emperor during the Qing Dynasty (1644-1911)	Chinese First Historical Archive at Beijing Palace Museum	Yu Xue Fen Cun (Records of Rainfall Infiltration and Snowfall) from 273 administrative sites	rain infiltration depth measurements from the dry-wet soil boundary layer to the ground surface; depth on the surface after snowfall for each precipitation event	reconstructed summer (June-August) precipitation (mm)	precipitation reconstruction	indirect inorganic	no	r	wcwang@albany.edu	Ge, Q.S. et al. “Reconstruction of Historical Climate in China, High-Resolution Precipitation Data from Qing Dynasty Archives.” Bulletin of the American Meteorological Society 86 (2005): 671–79.	x	will be published in Documentary Proxy Dataset, for now contact angela-maria.burgdorf@giub.unibe.ch	not mentioned in paper which month are meant by "summer" and "winter", DJF and JJA are assumed
43	p	precipitation	annual		1736	1911	176		2000	middle and lower reaches of the Yellow River	China	Asia	2				34	38	109	119	2	based on graph in paper	Memos-to-Emperor during the Qing Dynasty (1644-1911)	Yu-Xue-Fen-Cun archive	Yu Xue Fen Cun (Records of Rainfall Infiltration and Snowfall) from 273 administrative sites	rain infiltration depth measurements from the dry-wet soil boundary layer to the ground surface; depth on the surface after snowfall for each precipitation event	reconstructed annual precipitation (mm) for 4 regions	precipitation reconstruction	indirect inorganic	no	r	zhengjy@igsnrr.ac.cn	Zheng, J. et al. “Variation of Precipitation for the Last 300 Years over the Middle and Lower Reaches of the Yellow River.” Science in China Series D: Earth Sciences 48 (2005): 2182–93.
44	p	precipitation	annual		1736	1911	176		2000	Hebei	China	Asia	2		37.8957	114.904					1	Hebei	Memos-to-Emperor during the Qing Dynasty (1644-1911)	Yu-Xue-Fen-Cun archive	Yu Xue Fen Cun (Records of Rainfall Infiltration and Snowfall) from 273 administrative sites	rain infiltration depth measurements from the dry-wet soil boundary layer to the ground surface; depth on the surface after snowfall for each precipitation event	reconstructed annual precipitation (mm) for Hebi	precipitation reconstruction	indirect inorganic	no	r	zhengjy@igsnrr.ac.cn	Zheng, J. et al. “Variation of Precipitation for the Last 300 Years over the Middle and Lower Reaches of the Yellow River.” Science in China Series D: Earth Sciences 48 (2005): 2182–93.
45	p	precipitation	annual		1736	1911	176		2000	Jinnan	China	Asia	2		38.9379	117.357					1	Jinnan	Memos-to-Emperor during the Qing Dynasty (1644-1911)	Yu-Xue-Fen-Cun archive	Yu Xue Fen Cun (Records of Rainfall Infiltration and Snowfall) from 273 administrative sites	rain infiltration depth measurements from the dry-wet soil boundary layer to the ground surface; depth on the surface after snowfall for each precipitation event	reconstructed annual precipitation (mm) for Jinnan	precipitation reconstruction	indirect inorganic	no	r	zhengjy@igsnrr.ac.cn	Zheng, J. et al. “Variation of Precipitation for the Last 300 Years over the Middle and Lower Reaches of the Yellow River.” Science in China Series D: Earth Sciences 48 (2005): 2182–93.
46	p	precipitation	annual		1736	1911	176		2000	Weihe	China	Asia	2		44.9562	128.384					1	Weihe	Memos-to-Emperor during the Qing Dynasty (1644-1911)	Yu-Xue-Fen-Cun archive	Yu Xue Fen Cun (Records of Rainfall Infiltration and Snowfall) from 273 administrative sites	rain infiltration depth measurements from the dry-wet soil boundary layer to the ground surface; depth on the surface after snowfall for each precipitation event	reconstructed annual precipitation (mm) for Weihe	precipitation reconstruction	indirect inorganic	no	r	zhengjy@igsnrr.ac.cn	Zheng, J. et al. “Variation of Precipitation for the Last 300 Years over the Middle and Lower Reaches of the Yellow River.” Science in China Series D: Earth Sciences 48 (2005): 2182–93.
47	p	precipitation	annual		1736	1911	176		2000	Shandong	China	Asia	2		35.894	117.925					1	Shandong	Memos-to-Emperor during the Qing Dynasty (1644-1911)	Yu-Xue-Fen-Cun archive	Yu Xue Fen Cun (Records of Rainfall Infiltration and Snowfall) from 273 administrative sites	rain infiltration depth measurements from the dry-wet soil boundary layer to the ground surface; depth on the surface after snowfall for each precipitation event	reconstructed annual precipitation (mm) for Shandong	precipitation reconstruction	indirect inorganic	no	r	zhengjy@igsnrr.ac.cn	Zheng, J. et al. “Variation of Precipitation for the Last 300 Years over the Middle and Lower Reaches of the Yellow River.” Science in China Series D: Earth Sciences 48 (2005): 2182–93.
48	p	precipitation	seasonal		1736	1911	176		2000	middle and lower reaches of the Yangtze River	China	Asia	2				28	34	112	122	2	based on graph in paper	Memos-to-Emperor during the Qing Dynasty (1644-1911)	Yu-Xue-Fen-Cun archive	Yu Xue Fen Cun (Records of Rainfall Infiltration and Snowfall) from 273 administrative sites	rain infiltration depth measurements from the dry-wet soil boundary layer to the ground surface; depth on the surface after snowfall for each precipitation event	initial dates of the meiyu (East Asian June-July rainy season) for middle and lower reaches of Yangtze River as well as the northwestern part of East Asian Summer Monsoon	Meiyu starting date	indirect inorganic	no	ts	haozx@igsnrr.ac.cn	Ge, Q.S. et al. “Meiyu in the Middle and Lower Reaches of the Yangtze River since 1736.” Chinese Science Bulletin 53 (2008): 107–14.	x	will be published in Documentary Proxy Dataset, for now contact angela-maria.burgdorf@giub.unibe.ch
49	p	precipitation	seasonal		1736	1911	176		2000	middle and lower reaches of the Yangtze River	China	Asia	2				28	34	112	122	2	based on graph in paper	Memos-to-Emperor during the Qing Dynasty (1644-1911)	Yu-Xue-Fen-Cun archive	Yu Xue Fen Cun (Records of Rainfall Infiltration and Snowfall) from 273 administrative sites	rain infiltration depth measurements from the dry-wet soil boundary layer to the ground surface; depth on the surface after snowfall for each precipitation event	final dates and duration of the meiyu (East Asian June-July rainy season) for middle and lower reaches of Yangtze River as well as the northwestern part of East Asian Summer Monsoon	Meiyu ending date	indirect inorganic	no	ts	haozx@igsnrr.ac.cn	Ge, Q.S. et al. “Meiyu in the Middle and Lower Reaches of the Yangtze River since 1736.” Chinese Science Bulletin 53 (2008): 107–14.	x	will be published in Documentary Proxy Dataset, for now contact angela-maria.burgdorf@giub.unibe.ch
50	p	precipitation	seasonal		1736	1911	176		2000	middle and lower reaches of the Yangtze River	China	Asia	2				28	34	112	122	2	based on graph in paper	Memos-to-Emperor during the Qing Dynasty (1644-1911)	Yu-Xue-Fen-Cun archive	Yu Xue Fen Cun (Records of Rainfall Infiltration and Snowfall) from 273 administrative sites	rain infiltration depth measurements from the dry-wet soil boundary layer to the ground surface; depth on the surface after snowfall for each precipitation event	duration of the meiyu (East Asian June-July rainy season) for middle and lower reaches of Yangtze River as well as the northwestern part of East Asian Summer Monsoon	Meiyu length	indirect inorganic	no	ts	haozx@igsnrr.ac.cn	Ge, Q.S. et al. “Meiyu in the Middle and Lower Reaches of the Yangtze River since 1736.” Chinese Science Bulletin 53 (2008): 107–14.	x	will be published in Documentary Proxy Dataset, for now contact angela-maria.burgdorf@giub.unibe.ch
51	p	precipitation	seasonal	JJ	1736	1911	176		2000	middle and lower reaches of the Yangtze River	China	Asia	2				28	34	112	122	2	based on graph in paper	Memos-to-Emperor during the Qing Dynasty (1644-1911)	Yu-Xue-Fen-Cun archive	Yu Xue Fen Cun (Records of Rainfall Infiltration and Snowfall) from 273 administrative sites	rain infiltration depth measurements from the dry-wet soil boundary layer to the ground surface; depth on the surface after snowfall for each precipitation event	initial/final dates and duration of the meiyu (East Asian June-July rainy season) for middle and lower reaches of Yangtze River as well as the northwestern part of East Asian Summer Monsoon	reconstructed Meiyu precipitation amount	indirect inorganic	no	ts	haozx@igsnrr.ac.cn	Ge, Q.S. et al. “Meiyu in the Middle and Lower Reaches of the Yangtze River since 1736.” Chinese Science Bulletin 53 (2008): 107–14.
52	p	precipitation	monthly, seasonal and annual		1736	1911	176		2000	Taiyuan	China	Asia	2		37.8706	112.549					1	Taiyuan	Memos-to-Emperor during the Qing Dynasty (1644-1911)	Yu-Xue-Fen-Cun archive	Yu Xue Fen Cun (Records of Rainfall Infiltration and Snowfall) from 273 administrative sites	rain infiltration depth measurements from the dry-wet soil boundary layer to the ground surface; depth on the surface after snowfall for each precipitation event		length of rainy season	indirect inorganic	no	ts	geqs@igsnrr.ac.cn	Ge, Q.S. et al. “The Rainy Season in the Northwestern Part of the East Asian Summer Monsoon in the 18th and 19th Centuries.” Quaternary Science Reviews 229 (2011): 16–23.	x	will be published in Documentary Proxy Dataset, for now contact angela-maria.burgdorf@giub.unibe.ch
53	p	precipitation	monthly, seasonal and annual		1736	1911	176		2000	Datong	China	Asia	2		40.0768	113.3					1	Datong	Memos-to-Emperor during the Qing Dynasty (1644-1911)	Yu-Xue-Fen-Cun archive	Yu Xue Fen Cun (Records of Rainfall Infiltration and Snowfall) from 273 administrative sites	rain infiltration depth measurements from the dry-wet soil boundary layer to the ground surface; depth on the surface after snowfall for each precipitation event		length of rainy season	indirect inorganic	no	ts	geqs@igsnrr.ac.cn	Ge, Q.S. et al. “The Rainy Season in the Northwestern Part of the East Asian Summer Monsoon in the 18th and 19th Centuries.” Quaternary Science Reviews 229 (2011): 16–23.	x	will be published in Documentary Proxy Dataset, for now contact angela-maria.burgdorf@giub.unibe.ch
54	p	precipitation	monthly, seasonal and annual		1736	1911	176		2000	Yulin	China	Asia	2		22.654	110.181					1	Yulin	Memos-to-Emperor during the Qing Dynasty (1644-1911)	Yu-Xue-Fen-Cun archive	Yu Xue Fen Cun (Records of Rainfall Infiltration and Snowfall) from 273 administrative sites	rain infiltration depth measurements from the dry-wet soil boundary layer to the ground surface; depth on the surface after snowfall for each precipitation event		length of rainy season	indirect inorganic	no	ts	geqs@igsnrr.ac.cn	Ge, Q.S. et al. “The Rainy Season in the Northwestern Part of the East Asian Summer Monsoon in the 18th and 19th Centuries.” Quaternary Science Reviews 229 (2011): 16–23.	x	will be published in Documentary Proxy Dataset, for now contact angela-maria.burgdorf@giub.unibe.ch
55	p	precipitation	monthly	MJJA	1723	1810	88			Suzhou	China	Asia	2		31.299	120.585					1	Suzhou	Memos-to-Emperor during the Qing Dynasty (1636-1910)	First National Historical Archives, Beijing	Qing Yu Lu - Clear and Rain Records (CRR)	daily weather reports on sky conditions,wind directions, precipitation type and intensity and duration & irregular observations of special weather phenomena	reconstructed precipitation for May, June, July, August	reconstructed precipitation	direct observed	yes	r	pao@windy.aos.wisc.edu, pwang1@wisc.edu	Wang P. K. and Zhang D. "Reconstruction of 18th century summer precipitation of Nanjing, Suzhou, and Hangzhou, China, based on the Clear and Rain Records" In Climate Since A.D. 1500, edited by R.S. Bradley and P.D. Jones, 92–117. London: Routledge, 1995.
56	p	precipitation	monthly	MJJA	1722	1798	77			Nanjing	China	Asia	2		32.0603	118.797					1	Nanjing	Memos-to-Emperor during the Qing Dynasty (1636-1910)	First National Historical Archives, Beijing	Qing Yu Lu - Clear and Rain Records (CRR)	daily weather reports on sky conditions,wind directions, precipitation type and intensity and duration & irregular observations of special weather phenomena	reconstructed precipitation for May, June, July, August	reconstructed precipitation	direct observed	yes	r	pao@windy.aos.wisc.edu, pwang1@wisc.edu	Wang P. K. and Zhang D. "Reconstruction of 18th century summer precipitation of Nanjing, Suzhou, and Hangzhou, China, based on the Clear and Rain Records" In Climate Since A.D. 1500, edited by R.S. Bradley and P.D. Jones, 92–117. London: Routledge, 1995.
57	p	precipitation	monthly	MJJA	1723	1773	51			Hangzhou	China	Asia	2		30.2741	120.155					1	Hangzhou	Memos-to-Emperor during the Qing Dynasty (1636-1910)	First National Historical Archives, Beijing	Qing Yu Lu - Clear and Rain Records (CRR)	daily weather reports on sky conditions,wind directions, precipitation type and intensity and duration & irregular observations of special weather phenomena	reconstructed precipitation for May, June, July, August	reconstructed June-August precipitation	direct observed	yes	r	pao@windy.aos.wisc.edu, pwang1@wisc.edu	Wang P. K. and Zhang D. "Reconstruction of 18th century summer precipitation of Nanjing, Suzhou, and Hangzhou, China, based on the Clear and Rain Records" In Climate Since A.D. 1500, edited by R.S. Bradley and P.D. Jones, 92–117. London: Routledge, 1995.
58	p	precipitation	decadal		0	2000	2001			eastern China	China	Asia	2				25	46	100	130	0		official historical documents (anals from the 24 dynastic histories) in China; historical snow records in Korea	not specified	historical documents from China; historical snow records from Korea	references to snow anomalies	Snow anomaly index based on snow anomaly events: total-, heavy- and less- snow events per decade	abnomal snow index	direct observed	yes	i	chuguoqiang@mail.igcas.ac.cn	Chu, Guoqiang et al. "Snow anomaly events from historical documents in eastern China during the past two millennia and implication for low-frequency variability of AO/NAO and PDO" Geophysical Research Letters 35 (2008): L14806.	x	https://www.ncdc.noaa.gov/paleo/study/8726
59	p	precipitation	decadal		501	2000	1500			North China Plain	China	Asia	2				34	40	105	122	0		based on datasets from Zhang et al. 1993; Zhang 1996, China Meteorological Administration (CMA): Yearly charts of dryness/wetness in China	not specified	combination of three separate sub-datasets (drought/flood grade series (Zhang 1996), drought/flood archives (Zheng et al. 1993), drought/flood grading (Zhang 1996)	references to drought and rainfall/floods	five-point ordinal index: -2/2 =severe drought, drought, normal, flood, and heavy flood	dryness-wetness index	direct observed	no	i	geqs@igsnrr.ac.cn	Zheng, J. et al. “Precipitation Variability and Extreme Events in Eastern China during the Past 1500 Years.” Terrestrial Atmospheric and Oceanic Sciences 17 (2006): 579–92.
60	p	precipitation	decadal		501	2000	1500			Jiang-Huai area	China	Asia	2				31	34	108	120	0		based on datasets from Zhang et al. 1993; Zhang 1996, China Meteorological Administration (CMA): Yearly charts of dryness/wetness in China	not specified	combination of three separate sub-datasets (drought/flood grade series (Zhang 1996), drought/flood archives (Zheng et al. 1993), drought/flood grading (Zhang 1996)	references to drought and rainfall/floods	five-point ordinal index: -2/2 =severe drought, drought, normal, flood, and heavy flood	dryness-wetness index	direct observed	no	i	geqs@igsnrr.ac.cn	Zheng, J. et al. “Precipitation Variability and Extreme Events in Eastern China during the Past 1500 Years.” Terrestrial Atmospheric and Oceanic Sciences 17 (2006): 579–92.
61	p	precipitation	decadal		501	2000	1500			Jiang-Nan area	China	Asia	2				25	31	111	122	0		based on datasets from Zhang et al. 1993; Zhang 1996, China Meteorological Administration (CMA): Yearly charts of dryness/wetness in China	not specified	combination of three separate sub-datasets (drought/flood grade series (Zhang 1996), drought/flood archives (Zheng et al. 1993), drought/flood grading (Zhang 1996)	references to drought and rainfall/floods	five-point ordinal index: -2/2 =severe drought, drought, normal, flood, and heavy flood	dryness-wetness index	direct observed	no	i	geqs@igsnrr.ac.cn	Zheng, J. et al. “Precipitation Variability and Extreme Events in Eastern China during the Past 1500 Years.” Terrestrial Atmospheric and Oceanic Sciences 17 (2006): 579–92.
62	p	precipitation	decadal		1368	1911	544			Baoji area	China	Asia	2				33.5833	35.1	106.3	108.05	0		“The Historical Inundation and Drought of Baoji” (WCN, 1985); “Encyclopaedia of China’s Meteorological Disasters; Shaanxi Volume” (Wen and Zhai, 2005); “A Compendium of Chinese Meteorological Records of the Last 3000 Years” (Zhang, 2000); “Disaster History in Northwest China” (Yuan, 1994); “Brief Records on Historical Natural Disasters in Shaanxi” (Wang, 2002); local chronicles of Baoji and the c…	not specified		descriptions of drought and flood events	drought and flood classification (7 levels) and frequency: 1-7= Catastrophic flood, severe flood, mild flood, normal, mild drought, severe drought, catastrophic drought	dryness-wetness index	direct observed	no	i	hyhm2006@163.com	Wan, Honglian et al. "Spatio-temporal evolution of drought and flood disaster chains in Baoji area from 1368 to 1911." Journal of Geographical Sciences 28 (2018): 337–350.
63	p	precipitation	decadal		1736	2000	265			North China	China	Asia	2				34	39	108	120	2	based on graph in paper	Memos-to-Emperor during the Qing Dynasty (1644-1911)	Yu-Xue- Fen-Cun archive	Yu Xue Fen Cun (Records of Rainfall Infiltration and Snowfall) from 273 administrative sites; chronology of El Niño and La Niña events (Gergis and Fowler (2009); chronology of large volcanic eruptions (Global Volcanism Program, 2013)	rain infiltration depth measurements from the dry-wet soil boundary layer to the ground surface; depth on the surface after snowfall for each precipitation event; ENSO events; volcanic eruptions	frequency of extreme drought and flood	drought-flood frequency time series	indirect inorganic	no	e	haozx@igsnrr.ac.cn	Zheng, J.Y. et al. “Variation of extreme drought and flood in North China revealed by document-based seasonal precipitation reconstruction for the past 300 years”, Climate of the Past 14 (2018): 1135-1145.
64	p	precipitation	annual	MJJAS	1470	1950	481	1951	2003	northern China, Great Bend of the Yellow River (GBYR) region	China	Asia	2				36	45	105	115	2	based on graph in paper	Memos-to-Emperor during the Qing Dynasty (1636-1910), local government drought/flood reports and private diaries	not specified in paper	Qing Yu Lu - Clear and Rain Records (CRR); daily precipitation data from 726 stations (1951–2003)	references to drought and rainfall/floods from 100 sites in eastern China	annual (May-September) dryness/wetness index (DW): 1-5 = Extremely wet, wet, normal, dry, extremely dry	dryness-wetness index	direct observed	no	i	qianwh@pku.edu.cn	Qian, Weihong et al. "Droughts near the northern fringe of the East Asian summer monsoon in China during 1470–2003." Climatic Change 110 (2012): 373–383.
65	p	precipitation	annual		1470	1998	529			eastern China	China	Asia	2				20	45	100	130	2	based on graph in paper	annals for local geographical and governmental units	not specified in paper	Yearly Charts of Dryness/Wetness based on qualitative descriptions	records of weather conditions that affect agriculture and living conditions	anuual dryness/wetness index (DW) for 25 and 100 sites: 1-5 = Extremely wet, wet, normal, dry, extremely dry	dryness-wetness index	direct observed	no	i	jsong@geog.niu.edu	Song, Jie "Changes in dryness/wetness in China during the last 529 years." International Journal of Climatology 20 (2000): 1003-1016.
66	t	temperatures	annual	May	1724	1986	263			Beijing	China	Asia	2		39.9	116.4					0		Memos-to-Emperor during the Qing Dynasty (1636-1910), few reports by personnel living in the forbidden city	First National Historical Archives, Beijing	Qing Yu Lu - Clear and Rain Records (CRR)	daily weather reports on sky conditions,wind directions, precipitation type and intensity and duration & irregular observations of special weather phenomena	reconstructed May temperatures	reconstructed temperature	direct observed	no	r	wcwang@albany.edu	Wang W.C.et al. "Beijing summer temperatures since 1724." In Climate Since A.D. 1500, edited by R.S. Bradley and P.D. Jones, 92–117. London: Routledge, 1995.		https://gcmd.nasa.gov/search/Metadata.do?Entry=EARTH_LAND_NGDC_PALEOCLIM1500AD&subset=amd&search=keyword:*&action=open_in_new_window#metadata	The link works but unfortunately, the data is not (anymore?)included
67	t	temperatures	annual	June	1724	1986	263			Beijing	China	Asia	2		39.9	116.4					0		Memos-to-Emperor during the Qing Dynasty (1636-1910), few reports by personnel living in the forbidden city	First National Historical Archives, Beijing	Qing Yu Lu - Clear and Rain Records (CRR)	daily weather reports on sky conditions,wind directions, precipitation type and intensity and duration & irregular observations of special weather phenomena	reconstructed June temperatures	reconstructed temperature	direct observed	no	r	wcwang@albany.edu	Wang W.C.et al. "Beijing summer temperatures since 1724." In Climate Since A.D. 1500, edited by R.S. Bradley and P.D. Jones, 92–117. London: Routledge, 1995.		https://gcmd.nasa.gov/search/Metadata.do?Entry=EARTH_LAND_NGDC_PALEOCLIM1500AD&subset=amd&search=keyword:*&action=open_in_new_window#metadata	The link works but unfortunately, the data is not (anymore?)included
68	t	temperatures	annual	July	1724	1986	263			Beijing	China	Asia	2		39.9	116.4					0		Memos-to-Emperor during the Qing Dynasty (1636-1910), few reports by personnel living in the forbidden city	First National Historical Archives, Beijing	Qing Yu Lu - Clear and Rain Records (CRR)	daily weather reports on sky conditions,wind directions, precipitation type and intensity and duration & irregular observations of special weather phenomena	reconstructed July temperatures	reconstructed temperature	direct observed	no	r	wcwang@albany.edu	Wang W.C.et al. "Beijing summer temperatures since 1724." In Climate Since A.D. 1500, edited by R.S. Bradley and P.D. Jones, 92–117. London: Routledge, 1995.		https://gcmd.nasa.gov/search/Metadata.do?Entry=EARTH_LAND_NGDC_PALEOCLIM1500AD&subset=amd&search=keyword:*&action=open_in_new_window#metadata	The link works but unfortunately, the data is not (anymore?)included
69	t	temperatures	annual	MJJ	1724	1986	263			Beijing	China	Asia	2		39.9	116.4					0		Memos-to-Emperor during the Qing Dynasty (1636-1910), few reports by personnel living in the forbidden city	First National Historical Archives, Beijing	Qing Yu Lu - Clear and Rain Records (CRR)	daily weather reports on sky conditions,wind directions, precipitation type and intensity and duration & irregular observations of special weather phenomena	reconstructed summer (May-July) temperatures	reconstructed temperature	direct observed	no	r	wcwang@albany.edu	Wang W.C.et al. "Beijing summer temperatures since 1724." In Climate Since A.D. 1500, edited by R.S. Bradley and P.D. Jones, 92–117. London: Routledge, 1995.		https://gcmd.nasa.gov/search/Metadata.do?Entry=EARTH_LAND_NGDC_PALEOCLIM1500AD&subset=amd&search=keyword:*&action=open_in_new_window#metadata	The link works but unfortunately, the data is not (anymore?)included
70	t	temperature	decadal		1100	1980	881			Taihu Lake Basin	China	Asia	2				30	32	119	122	1	Taihu Lake Basin	authorized history collection of historical books "Preliminary Reorganization of Historical Books" written by Prof. Xu Jinzhi; Local meteorological, hydraulic, cultural and historical departments	not specified in paper	records of winter severeness (e.g. freezing of lakes and rivers), grain (mostly rice) production	frequency of cold and warm years	temperature index and quasi quantified temperature reconstruction	temperature index	direct observed, indirect organic, indirect inorganic		i		Shen, X. Y. and Chen, J. Q. "Grain production and climatic variation in Taihu Lake Basin." Scientia Geographica Sinica 11 (1991): 207–212 (in Chinese).; Shen, X.Y., and J.Q. Chen. “Grain Production and Climatic Variation in Taihu Lake Basin.” Chinese Geographical Science 3 (1993): 173–78.			more informations (especially on the used documentary sources) in the chinese manuscript?
71	p	precipitation	decadal		960	2000	1041			Longxi area, Tibetan Plateau	China	Asia	2		35	104.6					0	Longxi	official chronicles of emperors; official chronicles of the Ming and Qing Dynasty; local chronicles called Zhi	local archives	documentation of droughts and floods	references to drought and rainfall/floods	dryness/wetness index (DW): 1-5 = Extremely wet, wet, normal, dry, extremely dry	dryness-wetness index	direct observed	no	i	tanlch@ieecas.cn	Tan, Liangcheng et al. "Precipitation variations of Longxi, northeast margin of Tibetan Plateau since AD 960 and their relationship with solar activity." Climate of the Past 4 (2008): 19-28.	x	https://www.ncdc.noaa.gov/paleo-search/study/8665
72	p	precipitation	annual	MJJAS	1470	1979	510	1961	2000	West Qinling region	China	Asia	2				32	35	102	107	2	region estimated based on graph in paper	2200 local annals/gazettes and many other historical writings from provinces and counties	Chinese Academy of Meteorological Science (1981)	Yearly Charts of Dryness/Wetness based on qualitative descriptions	39 tree-ring chronologies and 28 dryness/wetness indices	annual (May-September) dryness/wetness index (DW): 1-5 = Extremely wet, wet, normal, dry, extremely dry is used to derive precipitation reconstruction	reconstructed precipitation	multiproxy, direct observed	no	r (multiproxy)	shifeng@mail.iggcas.ac.cn	Yang, Fengmei et al. "The spatial distribution of precipitation over the West Qinling region, China, AD 1470-2000." Palaeogeography, Palaeoclimatology, Palaeoecology 443 (2016): 278-285.	x	https://www.ncdc.noaa.gov/paleo-search/study/19683	index not available on noaa
73	t	temperatures	decadal	winter	1470	1970	501			Guangdong and Guangxi province	China	Asia	2	2480	23.5	112.5					0		1271 local histories, 5 historical works, 4480 historical writings	not specified in paper			frequency of cold and warm years recorded in historical documents	temperature index	direct observed	no	i		Zhang, D.E. “Winter Temperature Changes during the Last 500 Years in South China.” Chinese Science Bulletin 25 (1980): 497–500.	x	https://www.ncdc.noaa.gov/paleo-search/study/22835
74	t	temperatures	decadal	winter	1470	1970	501			Hunan-Jiangsu	China	Asia	2	2300	28	116.5					0		1272 local histories, 5 historical works, 4480 historical writings	not specified in paper			frequency of cold and warm years recorded in historical documents	temperature index	direct observed	no	i		Zhang, D.E. “Winter Temperature Changes during the Last 500 Years in South China.” Chinese Science Bulletin 25 (1980): 497–500.	x	https://www.ncdc.noaa.gov/paleo-search/study/22835
75	t	temperatures	decadal	winter	1470	1970	501			Lower reaches of the Yangtze River	China	Asia	2	2200	32.1	118.8					0		1273 local histories, 5 historical works, 4480 historical writings	not specified in paper			frequency of cold and warm years recorded in historical documents	temperature index	direct observed	no	i		Zhang, D.E. “Winter Temperature Changes during the Last 500 Years in South China.” Chinese Science Bulletin 25 (1980): 497–500.	x	https://www.ncdc.noaa.gov/paleo-search/study/22835
76	t	temperatures	decadal	winter	1470	1970	501			Middle reaches of the Yangtze River	China	Asia	2	1900	30.5	114.5					0		1274 local histories, 5 historical works, 4480 historical writings	not specified in paper			frequency of cold and warm years recorded in historical documents	temperature index	direct observed	no	i		Zhang, D.E. “Winter Temperature Changes during the Last 500 Years in South China.” Chinese Science Bulletin 25 (1980): 497–500.	x	https://www.ncdc.noaa.gov/paleo-search/study/22835
77	t	temperatures	decadal	winter	1470	1970	501			Guangdong and Guangxi province	China	Asia	2	2400	25	118					0		1275 local histories, 5 historical works, 4480 historical writings	not specified in paper			frequency of cold and warm years recorded in historical documents	temperature index	direct observed	no	i		Zhang, D.E. “Winter Temperature Changes during the Last 500 Years in South China.” Chinese Science Bulletin 25 (1980): 497–500.	x	https://www.ncdc.noaa.gov/paleo-search/study/22835
78	w	wind	annual	June	1849	2014	166			western North Pacific		South-West Pacific	5				5	30	100	140	0		ship logbooks	not specified in paper	wind direction observations from ICOADS v3.0 (Freeman et al. 2017)	wind directions measurements on board ships in the regions: D1: [100E-130E; 5N-15N] and D2: [110E-140E; 20N-30N]	Western North Pacific directional index (WNPDI): defined as the sum of the percentage of days in a month with prevailing wind blowing from the west (wind direction between 225° and 315° from the true north) at D1 and the percentage of days in a month with prevailing wind blowing from the east (wind direction between 45° and 135° from the true north) at D2; WNPDI for JJA	Western North Pacific directional index	direct observed, measured	no	i	ivegmar@upo.es	Vega, Inmaculada et al. "Reconstructing the Western North Pacific Summer Monsoon since the Late Nineteenth Century." Journal of Climate 31 (2018): 355–368.	x	https://www.upo.es/vareclim/Data/WNPDI.txt
79	w	wind	annual	July	1849	2014	166			western North Pacific		Asia	2				5	30	100	140	0		ship logbooks	not specified in paper	wind direction observations from ICOADS v3.0 (Freeman et al. 2017)	wind directions measurements on board ships in the regions: D1: [100E-130E; 5N-15N] and D2: [110E-140E; 20N-30N]	Western North Pacific directional index (WNPDI): defined as the sum of the percentage of days in a month with prevailing wind blowing from the west (wind direction between 225° and 315° from the true north) at D1 and the percentage of days in a month with prevailing wind blowing from the east (wind direction between 45° and 135° from the true north) at D2; WNPDI for JJA	Western North Pacific directional index	direct observed, measured	no	i	ivegmar@upo.es	Vega, Inmaculada et al. "Reconstructing the Western North Pacific Summer Monsoon since the Late Nineteenth Century." Journal of Climate 31 (2018): 355–368.	x	https://www.upo.es/vareclim/Data/WNPDI.txt
80	w	wind	annual	August	1849	2014	166			western North Pacific		Asia	2				5	30	100	140	0		ship logbooks	not specified in paper	wind direction observations from ICOADS v3.0 (Freeman et al. 2017)	wind directions measurements on board ships in the regions: D1: [100E-130E; 5N-15N] and D2: [110E-140E; 20N-30N]	Western North Pacific directional index (WNPDI): defined as the sum of the percentage of days in a month with prevailing wind blowing from the west (wind direction between 225° and 315° from the true north) at D1 and the percentage of days in a month with prevailing wind blowing from the east (wind direction between 45° and 135° from the true north) at D2; WNPDI for JJA	Western North Pacific directional index	direct observed, measured	no	i	ivegmar@upo.es	Vega, Inmaculada et al. "Reconstructing the Western North Pacific Summer Monsoon since the Late Nineteenth Century." Journal of Climate 31 (2018): 355–368.	x	https://www.upo.es/vareclim/Data/WNPDI.txt
81	p	precipitation	decadal	winter	800	1500	701			Iraq, Egypt, Syria, Palestine, Hejaz, Yemen	Iraq, Egypt, Syria, Palestine, Hejaz, Yemen	Asia	2				10	40	25	60	2	based on graph in paper	akhbār genre (historiographical literature) including universal and town chronicles, accounts of journeys, and occasional diaries.	not specified in paper	reports on wet and dry conditions	wetness-dryness frequency time series	overview (e.g. index ts for hydroclimatic winter conditions for Iraq)	dryness-wetness index	direct observed	no	i	steffen.vogt@geographie.uni-freiburg.de	Vogt, Steffen et al. “Assessing the Medieval Climate Anomaly in the Middle East: The Potential of Arabic Documentary Sources.” PAGES News 19 (2011): 28–29.
82	p	precipitation	annual		1781	1878	98			Mumbai (Bombay)	India	Asia	2		19.076	72.8777					1	Bombay	English-language narrative materials including written reports (e.g. ‘India Office Records’), correspondence, personal papers, diaries and newspaper articles; data from missionary societies; newspapers	India Office Archives (British Library); Data from missionary societies Harvard University, Boston, USA (ABCFM), University of Birmingham, UK (CMS) and the National Library of Scotland, Edinburgh, UK (SMS).; British Library Newspaper Collection	anecdotal and more formal descriptions of weather conditions and longer-term climate trends; instrumental meteorological observations	references to monsoon duration and intensity	monsoon onset: marked increase in rainfall; change of wind direction; marked drop in pressure and temperature	Indian Monsoon onset time series	direct observed	yes	i	g.adamson@brighton.ac.uk	Adamson, George C.D., and David J. Nash. “Long-Term Variability in the Date of Monsoon Onset over Western India.” Climate Dynamics 40 (2013): 2589–603.	*	table printed in paper
83	p	precipitation	annual		1781	1860	80			western India	India	Asia	2				18	23	71.5	74.5	2	based on graph in paper	English-language narrative materials including written reports (e.g. ‘India Office Records’), correspondence, personal papers, diaries and newspaper articles; data from missionary societies; newspapers	India Office Archives (British Library); Data from missionary societies Harvard University, Boston, USA (ABCFM), University of Birmingham, UK (CMS) and the National Library of Scotland, Edinburgh, UK (SMS).; British Library Newspaper Collection	anecdotal and more formal descriptions of weather conditions and longer-term climate trends; instrumental meteorological observations	references to monsoon duration and intensity	WIMR (Western Indian Monsoon Reconstruction): five-point ordinal monsoon strength index: -2/2 = scanty, deficient, normal, excess, heavy	Monsoon index	direct observed	yes	i	g.adamson@brighton.ac.uk	Adamson, George C.D., and David J. Nash. “Documentary Reconstruction of Monsoon Rainfall Variability over Western India, 1781–1860.” Climate Dynamics 42 (2014): 749–69.	x	will be published in Documentary Proxy Dataset, for now contact angela-maria.burgdorf@giub.unibe.ch
84	p	precipitation	annual		1781	1860	80			Mumbai (Bombay)	India	Asia	2		19.076	72.8777					1	Bombay	English-language narrative materials including written reports (e.g. ‘India Office Records’), correspondence, personal papers, diaries and newspaper articles; data from missionary societies; newspapers	India Office Archives (British Library); Data from missionary societies Harvard University, Boston, USA (ABCFM), University of Birmingham, UK (CMS) and the National Library of Scotland, Edinburgh, UK (SMS).; British Library Newspaper Collection	anecdotal and more formal descriptions of weather conditions and longer-term climate trends; instrumental meteorological observations	references to monsoon duration and intensity	five-point ordinal monsoon strength index for Mumbai: -2/2 = scanty, deficient, normal, excess, heavy	Monsoon index	direct observed	yes	i	g.adamson@brighton.ac.uk	Adamson, George C.D., and David J. Nash. “Documentary Reconstruction of Monsoon Rainfall Variability over Western India, 1781–1860.” Climate Dynamics 42 (2014): 749–69.	x	will be published in Documentary Proxy Dataset, for now contact angela-maria.burgdorf@giub.unibe.ch
85	p	precipitation	annual		1792	1860	69			Pune	India	Asia	2		18.5204	73.8567					1	Pune	English-language narrative materials including written reports (e.g. ‘India Office Records’), correspondence, personal papers, diaries and newspaper articles; data from missionary societies; newspapers	India Office Archives (British Library); Data from missionary societies Harvard University, Boston, USA (ABCFM), University of Birmingham, UK (CMS) and the National Library of Scotland, Edinburgh, UK (SMS).; British Library Newspaper Collection	anecdotal and more formal descriptions of weather conditions and longer-term climate trends; instrumental meteorological observations	references to monsoon duration and intensity	five-point ordinal monsoon strength index for Pune: -2/2 = scanty, deficient, normal, excess, heavy	Monsoon index	direct observed	yes	i	g.adamson@brighton.ac.uk	Adamson, George C.D., and David J. Nash. “Documentary Reconstruction of Monsoon Rainfall Variability over Western India, 1781–1860.” Climate Dynamics 42 (2014): 749–69.	x	will be published in Documentary Proxy Dataset, for now contact angela-maria.burgdorf@giub.unibe.ch
86	p	precipitation	annual		1781	1860	80			Gulf of Khambat	India	Asia	2		22.3072	73.1812					1	Vadodara	English-language narrative materials including written reports (e.g. ‘India Office Records’), correspondence, personal papers, diaries and newspaper articles; data from missionary societies; newspapers	India Office Archives (British Library); Data from missionary societies Harvard University, Boston, USA (ABCFM), University of Birmingham, UK (CMS) and the National Library of Scotland, Edinburgh, UK (SMS).; British Library Newspaper Collection	anecdotal and more formal descriptions of weather conditions and longer-term climate trends; instrumental meteorological observations	references to monsoon duration and intensity	five-point ordinal monsoon strength index for Gulf of Khambat region: -2/2 = scanty, deficient, normal, excess, heavy	Monsoon index	direct observed	yes	i	g.adamson@brighton.ac.uk	Adamson, George C.D., and David J. Nash. “Documentary Reconstruction of Monsoon Rainfall Variability over Western India, 1781–1860.” Climate Dynamics 42 (2014): 749–69.	x	will be published in Documentary Proxy Dataset, for now contact angela-maria.burgdorf@giub.unibe.ch
87	t	temperatures	annual	March	801	1880	1080	1881	2005	Kyoto	Japan	Asia	2		35	135.67					0		old diaries and chronicles of events, written by emperors, aristocrats, politicians, monks, and merchants	not specified in paper	plant phenology record	Cherry tree- flowering date records (Prunus jamasakura)	Date of the cherry blossom festivals: Full-blossoming dates; historical period ( A.D. 801–1880) and the instrumental period ( A.D. 1881–2005)	cherry flowering date	Indirect organic	yes	r	aono@envi.osakafu-u.ac.jp	Aono, Yasuyuki, and Yukio Omoto. “Estimation of Temperature at Kyoto since the 11th Century. Using Flowering Data of Cherry Trees in Old Documents.” Journal of Agricultural Meteorology 49 (1994): 263–72.; Aono, Yasuyuki, and Keiko Kazui. “Phenological Data Series of Cherry Tree flowering in Kyoto Japan and Its Application to Reconstruction of Springtime Temperatures since the 9th Century.” Intern…	x	https://www.ncdc.noaa.gov/paleo/study/26430
88	t	temperatures	annual	March	801	1880	1080	1881	2005	Kyoto	Japan	Asia	2		35	135.67					0		old diaries and chronicles of events, written by emperors, aristocrats, politicians, monks, and merchants	not specified in paper	plant phenology record	Cherry tree- flowering date records (Prunus jamasakura)	reconstructed March temperatures	reconstructed temperature	Indirect organic	yes	r	aono@envi.osakafu-u.ac.jp	Aono, Yasuyuki, and Yukio Omoto. “Estimation of Temperature at Kyoto since the 11th Century. Using Flowering Data of Cherry Trees in Old Documents.” Journal of Agricultural Meteorology 49 (1994): 263–72.; Aono, Yasuyuki, and Keiko Kazui. “Phenological Data Series of Cherry Tree flowering in Kyoto Japan and Its Application to Reconstruction of Springtime Temperatures since the 9th Century.” Intern…	x	https://www.ncdc.noaa.gov/paleo/study/26430
89	t	temperature	annual	October	918	2012	1095			Kyoto	Japan	Asia	2		35	135.67					0		old diaries, historiography, and daily newspapers	paper in Japanese	plant phenology record	maple leaf tinting in autumn	reconstructed October temperatures	leaf coloring date	Indirect organic	yes	r	aono@envi.osakafu-u.ac.jp	Aono, Yasuyuki and Tani, Ayaka. "Autumn temperature deduced from historical records of autumn tints phenology of maple tree in Kyoto, Japan." Climate in Biosphere 14 (2014): 18-28.	x	will be published in Documentary Proxy Dataset, for now contact angela-maria.burgdorf@giub.unibe.ch
90	t	temperature	annual	October	918	2012	1095			Kyoto	Japan	Asia	2		35	135.67					0		old diaries, historiography, and daily newspapers	paper in Japanese	plant phenology record	maple leaf tinting in autumn	reconstructed October temperatures	reconstructed temperature	Indirect organic	yes	r	aono@envi.osakafu-u.ac.jp	Aono, Yasuyuki and Tani, Ayaka. "Autumn temperature deduced from historical records of autumn tints phenology of maple tree in Kyoto, Japan." Climate in Biosphere 14 (2014): 18-28.	x	will be published in Documentary Proxy Dataset, for now contact angela-maria.burgdorf@giub.unibe.ch
91	t	temperatures	annual	March	1643	1996	354			Edo (Tokyo)	Japan	Asia	2		35.6804	139.769					1	Tokyo	old diaries and chronicles of events,	e.g. National Diet Library and the Historiographical Institute in the University of Tokyo	plant phenology record	Cherry tree flowering date records (Prunus jamasakura)	reconstructed March temperatures	reconstructed temperature	Indirect organic	yes	r	aono@envi.osakafu-u.ac.jp	Aono, Yasuyuki. “Cherry Blossom Phenological Data since the Seventeenth Century for Edo (Tokyo), Japan, and Their Application to Estimation of March Temperatures.” International Journal of Biometeorology 59 (2015): 427–34.	x	will be published in Documentary Proxy Dataset, for now contact angela-maria.burgdorf@giub.unibe.ch
92	t	temperatures	annual	March	1636	1905	270			Edo (Tokyo)	Japan	Asia	2		35.6804	139.769					1	Tokyo	old diaries and chronicles of events,	e.g. National Diet Library and the Historiographical Institute in the University of Tokyo	plant phenology record	Cherry tree flowering date records (Prunus jamasakura)	observations of the time of full blossoming	cherry flowering date	Indirect organic	yes	r	aono@envi.osakafu-u.ac.jp	Aono, Yasuyuki. “Cherry Blossom Phenological Data since the Seventeenth Century for Edo (Tokyo), Japan, and Their Application to Estimation of March Temperatures.” International Journal of Biometeorology 59 (2015): 427–34.	x	will be published in Documentary Proxy Dataset, for now contact angela-maria.burgdorf@giub.unibe.ch
93	t	temperatures	daily	July	1721	1941	221	1876	2017	Hachioji	Japan	Asia	2		35.64	139.3					0		large number of weather diaries records of the Ishikawa family (Ishikawa diaries)	not specified in paper	detailed daily weather descriptions complied as a form of weather calendars by Xoshida (1987);	number of rainy days	reconstructed July temperatures	reconstructed temperature	direct observed	yes	r	takehiko.mikami@gmail.com	Mikami, Takehiko. “Long term variations of summer temperatures in Tokyo since 1721." Geographical Reports of Tokyo Metropolitan University 31 (1996): 157-165.	x	http://jcdp.jp/reconstructed-climate-indices
94	t	temperatures	annual	DJ	1444	1870	427		1995	central Japan	Japan	Asia	2	759	36.04	138.08					0		old diaries by Shinto priests	recorded at Suwa-Taisha Shrine, Yatsurugi Shrine (a branch shrine of Suwa Shrine, in the fishing village near the lake)	ice phenology record	lake-freezing dates of Lake Suwa	celebrated in a ceremony a couple of days after its occurrence: ice-cracking phenomenon Omiwatari	ice break up series	indirect inorganic	yes	r	takehiko.mikami@gmail.com	Mikami, Takehiko. “Climatic Variations in Japan Reconstructed from Historical Documents.” Weather 63 (2008): 190–93; Ishiguro, N. et Touchart,L. "Sur la trace de dieux du lac Suwa." Acta Geographica, N1500 (2001): 27-34. (not available); Ishiguro, N., Kajiwara, M., Fujita, T. Akiba, Y. and Touchart, L. "Heterogeneity of the Omiwatari records of Lake Suwa as the database for winter temperature est…	x	https://nsidc.org/data/lake_river_ice/freezethaw.html
95	t	temperatures	annual	DJ	1444	1870	427		1995	central Japan	Japan	Asia	2	759	36.15	138.08					0		old diaries by Shinto priests	recorded at Suwa-Taisha Shrine, Yatsurugi Shrine (a branch shrine of Suwa Shrine, in the fishing village near the lake)	ice phenology record	lake-freezing dates of Lake Suwa	reconstructed December/January temperatures	reconstructed temperature	indirect inorganic	yes	r	takehiko.mikami@gmail.com	Mikami, Takehiko. “Climatic Variations in Japan Reconstructed from Historical Documents.” Weather 63 (2008): 190–93; Ishiguro, N. et Touchart,L. "Sur la trace de dieux du lac Suwa." Acta Geographica, N1500 (2001): 27-34. (not available); Ishiguro, N., Kajiwara, M., Fujita, T. Akiba, Y. and Touchart, L. "Heterogeneity of the Omiwatari records of Lake Suwa as the database for winter temperature est…
96	p	precipitation	annual	JJ	1700	1870	171			Chugoku, Kansai, Chubu	Japan	Asia	2				33.5	35.5	133	138	2	based on graph in paper	diaries	not specified in paper	reports from "Historical Weather Database" (Yoshimura and Yoshino 1988, Yoshimura, 1993))	weather descriptions of Baju season (early summer rain season in Japan)	Rainfall Variation Index (RVI) (June+July) for Chugoku, Kansai, Chubu region	precipitation index	direct observed	yes	i	amurata@mri-jma.go.jp	Akihiko Murata. "Reconstruction of rainfall variation of the Baiu in historical times " In Climate Since A.D. 1500, edited by R.S. Bradley and P.D. Jones, 92–117. London: Routledge, 1995.	*	graphs in chaper
97	p	precipitation	annual	JJ	1730	1870	141			Kyushu	Japan	Asia	2				32	47	129	132	2	based on graph in paper	diaries	not specified in paper	reports from "Historical Weather Database" (Yoshimura and Yoshino 1988, Yoshimura, 1993))	weather descriptions of Baju season (early summer rain season in Japan)	Rainfall Variation Index (RVI) (June+July) for Kansai region	precipitation index	direct observed	yes	i	amurata@mri-jma.go.jp	Akihiko Murata. "Reconstruction of rainfall variation of the Baiu in historical times " In Climate Since A.D. 1500, edited by R.S. Bradley and P.D. Jones, 92–117. London: Routledge, 1995.	*	graphs in chaper
98	p	precipitation	annual	JJ	1710	1890	181			Kanto	Japan	Asia	2				32	34	138	141.5	2	based on graph in paper	diaries	not specified in paper	reports from "Historical Weather Database" (Yoshimura and Yoshino 1988, Yoshimura, 1993))	weather descriptions of Baju season (early summer rain season in Japan)	Rainfall Variation Index (RVI) (June+July) for Chubu region	precipitation index	direct observed	yes	i	amurata@mri-jma.go.jp	Akihiko Murata. "Reconstruction of rainfall variation of the Baiu in historical times " In Climate Since A.D. 1500, edited by R.S. Bradley and P.D. Jones, 92–117. London: Routledge, 1995.	*	graphs in chaper
99	p	precipitation	annual	JJ	1700	1870	171			Tohoku	Japan	Asia	2				38	42	138	141.5	2	based on graph in paper	diaries	not specified in paper	reports from "Historical Weather Database" (Yoshimura and Yoshino 1988, Yoshimura, 1993))	weather descriptions of Baju season (early summer rain season in Japan)	Rainfall Variation Index (RVI) (June+July) for Kyushu region	precipitation index	direct observed	yes	i	amurata@mri-jma.go.jp	Akihiko Murata. "Reconstruction of rainfall variation of the Baiu in historical times " In Climate Since A.D. 1500, edited by R.S. Bradley and P.D. Jones, 92–117. London: Routledge, 1995.	*	graphs in chaper
100	t	temperatures	annual	July	1830	1889	60	1889	2010	Kawanishi	Japan	Asia	2		38	140					0		weather reports and personal diary	paper in Japanese	daily weather observations	numbers of “fine-weather” days for each July	reconstructed July maximum temperatures	reconstructed temperature	direct observed	yes	r	jhirano06gmail.com	Hirano, Junpei et al. "Reconstruction of July temperature variations since the 1830s in Kawanishi based on historical weather documents". Geographical Review of Japan (Series A) 86 (2013): 451-464. (in Japanese with English Abstract)	x	http://jcdp.jp/reconstructed-climate-indices/
101	t	temperature	annual	DJF	1831	1889	59	1889	2010	Kawanishi	Japan	Asia	2		38	140					0		weather reports and personal diary	paper in Japanese	daily weather observations	snowfall rate (percentage ratio of snowfall days to the total number of precipitation days)	reconstructed mean winter (December-February) temperatures	reconstructed temperature	direct observed	yes	r	jhirano06gmail.com	Hirano Junpei. "Reconstruction of winter temperature since the 1830s in Kawanishi based on historical weather documents". Geographical Review of Japan 85 (2012): 275-286. (in Japanese with English Abstract)	x	http://jcdp.jp/reconstructed-climate-indices/
102	w	wind	annual		1566	1900	335			Philippines/Northwestern Pacific	Philippines	South-West Pacific	5				5	19	117	125	2	based on graph in paper	24 reports about typhoons; records on casualties;	Manila Observatory; chronology published by Selga (1935)	weather observations from the Manila Observatory, particularly detailed description of storms and their impacts	Miguel Selga was a Spanish Jesuit published “Catalogue of typhoons 1348–1934”	frequency of landfalling typhoons	typhoon catalog	direct observed	yes	e	pribrod@upo.es	García-Herrera, Ricardo et al. “Northwest Pacific Typhoons Documented by the Philippine Jesuits, 1566–1900.” Journal of Geophysical Research 112 (2007): D06108.; Ribera, Pedro et al. “Historical Deadly Typhoons in the Philippines.” Weather 63 (2008): 194–99.	*	list printed in article
103	p	precipitation	annual		1801	1900	100			Rainfall region 1	Africa	Africa	1		35.7	7					0		settlers' diaries, explorers' journals, reports of scientific expeditions, historical chronicles documenting the reign of centuries of kings, oral tradition, missionary reports, and government records	not specified in paper	reports of famine, droughts, the character of the year's rainy season, agricultural failure or prosperity (conditions of crops); unusual weather, the status of vegetation and waterways; Hydrologic records (e.g. Nile, lake levels...); Rain gauge measurements	combination of documentary records, hydrologic records amd rain gauge measurements	seven-point ordinal index: -3/3= extremely dry, anomalously dry, dry, normal, wet, anomalously wet, to extremely wet	precipitation index	direct observed, measured	yes	i	snicholson@fsu.edu	Nicholson, Sharon E. "A Semi-Quantitative, Regional Precipitation Data Set for Studying African Climates of the Nineteenth Century, Part I. Overview of the Data Set." Climatic Change 50 (2001): 317-353. Nicholson, Sharon E. et al. “A Two-Century Precipitation Dataset for the Continent of Africa.” Bulletin of the American Meteorological Society 93 (2012a): 1219–31. Nicholson, Sharon E. et al. “Spa…	x	https://www.ncdc.noaa.gov/paleo-search/study/12201
104	p	precipitation	annual		1801	1900	100			Rainfall region 2	Africa	Africa	1		34	-5					0		settlers' diaries, explorers' journals, reports of scientific expeditions, historical chronicles documenting the reign of centuries of kings, oral tradition, missionary reports, and government records	not specified in paper	reports of famine, droughts, the character of the year's rainy season, agricultural failure or prosperity (conditions of crops); unusual weather, the status of vegetation and waterways; Hydrologic records (e.g. Nile, lake levels...); Rain gauge measurements	combination of documentary records, hydrologic records amd rain gauge measurements	seven-point ordinal index: -3/3= extremely dry, anomalously dry, dry, normal, wet, anomalously wet, to extremely wet	precipitation index	direct observed, measured	yes	i	snicholson@fsu.edu	Nicholson, Sharon E. "A Semi-Quantitative, Regional Precipitation Data Set for Studying African Climates of the Nineteenth Century, Part I. Overview of the Data Set." Climatic Change 50 (2001): 317-353. Nicholson, Sharon E. et al. “A Two-Century Precipitation Dataset for the Continent of Africa.” Bulletin of the American Meteorological Society 93 (2012a): 1219–31. Nicholson, Sharon E. et al. “Spa…	x	https://www.ncdc.noaa.gov/paleo-search/study/12202
105	p	precipitation	annual		1801	1900	100			Rainfall region 3	Africa	Africa	1		31.8	22.2					0		settlers' diaries, explorers' journals, reports of scientific expeditions, historical chronicles documenting the reign of centuries of kings, oral tradition, missionary reports, and government records	not specified in paper	reports of famine, droughts, the character of the year's rainy season, agricultural failure or prosperity (conditions of crops); unusual weather, the status of vegetation and waterways; Hydrologic records (e.g. Nile, lake levels...); Rain gauge measurements	combination of documentary records, hydrologic records amd rain gauge measurements	seven-point ordinal index: -3/3= extremely dry, anomalously dry, dry, normal, wet, anomalously wet, to extremely wet	precipitation index	direct observed, measured	yes	i	snicholson@fsu.edu	Nicholson, Sharon E. "A Semi-Quantitative, Regional Precipitation Data Set for Studying African Climates of the Nineteenth Century, Part I. Overview of the Data Set." Climatic Change 50 (2001): 317-353. Nicholson, Sharon E. et al. “A Two-Century Precipitation Dataset for the Continent of Africa.” Bulletin of the American Meteorological Society 93 (2012a): 1219–31. Nicholson, Sharon E. et al. “Spa…	x	https://www.ncdc.noaa.gov/paleo-search/study/12203
106	p	precipitation	annual		1801	1900	100			Rainfall region 4	Africa	Africa	1		27.2	-10.4					0		settlers' diaries, explorers' journals, reports of scientific expeditions, historical chronicles documenting the reign of centuries of kings, oral tradition, missionary reports, and government records	not specified in paper	reports of famine, droughts, the character of the year's rainy season, agricultural failure or prosperity (conditions of crops); unusual weather, the status of vegetation and waterways; Hydrologic records (e.g. Nile, lake levels...); Rain gauge measurements	combination of documentary records, hydrologic records amd rain gauge measurements	seven-point ordinal index: -3/3= extremely dry, anomalously dry, dry, normal, wet, anomalously wet, to extremely wet	precipitation index	direct observed, measured	yes	i	snicholson@fsu.edu	Nicholson, Sharon E. "A Semi-Quantitative, Regional Precipitation Data Set for Studying African Climates of the Nineteenth Century, Part I. Overview of the Data Set." Climatic Change 50 (2001): 317-353. Nicholson, Sharon E. et al. “A Two-Century Precipitation Dataset for the Continent of Africa.” Bulletin of the American Meteorological Society 93 (2012a): 1219–31. Nicholson, Sharon E. et al. “Spa…	x	https://www.ncdc.noaa.gov/paleo-search/study/12204
107	p	precipitation	annual		1801	1900	100			Rainfall region 5	Africa	Africa	1		29	0.1					0		settlers' diaries, explorers' journals, reports of scientific expeditions, historical chronicles documenting the reign of centuries of kings, oral tradition, missionary reports, and government records	not specified in paper	reports of famine, droughts, the character of the year's rainy season, agricultural failure or prosperity (conditions of crops); unusual weather, the status of vegetation and waterways; Hydrologic records (e.g. Nile, lake levels...); Rain gauge measurements	combination of documentary records, hydrologic records amd rain gauge measurements	seven-point ordinal index: -3/3= extremely dry, anomalously dry, dry, normal, wet, anomalously wet, to extremely wet	precipitation index	direct observed, measured	yes	i	snicholson@fsu.edu	Nicholson, Sharon E. "A Semi-Quantitative, Regional Precipitation Data Set for Studying African Climates of the Nineteenth Century, Part I. Overview of the Data Set." Climatic Change 50 (2001): 317-353. Nicholson, Sharon E. et al. “A Two-Century Precipitation Dataset for the Continent of Africa.” Bulletin of the American Meteorological Society 93 (2012a): 1219–31. Nicholson, Sharon E. et al. “Spa…	x	https://www.ncdc.noaa.gov/paleo-search/study/12205
108	p	precipitation	annual		1801	1900	100			Rainfall region 6	Africa	Africa	1		29.8	8					0		settlers' diaries, explorers' journals, reports of scientific expeditions, historical chronicles documenting the reign of centuries of kings, oral tradition, missionary reports, and government records	not specified in paper	reports of famine, droughts, the character of the year's rainy season, agricultural failure or prosperity (conditions of crops); unusual weather, the status of vegetation and waterways; Hydrologic records (e.g. Nile, lake levels...); Rain gauge measurements	combination of documentary records, hydrologic records amd rain gauge measurements	seven-point ordinal index: -3/3= extremely dry, anomalously dry, dry, normal, wet, anomalously wet, to extremely wet	precipitation index	direct observed, measured	yes	i	snicholson@fsu.edu	Nicholson, Sharon E. "A Semi-Quantitative, Regional Precipitation Data Set for Studying African Climates of the Nineteenth Century, Part I. Overview of the Data Set." Climatic Change 50 (2001): 317-353. Nicholson, Sharon E. et al. “A Two-Century Precipitation Dataset for the Continent of Africa.” Bulletin of the American Meteorological Society 93 (2012a): 1219–31. Nicholson, Sharon E. et al. “Spa…	x	https://www.ncdc.noaa.gov/paleo-search/study/12206
109	p	precipitation	annual		1801	1900	100			Rainfall region 7	Africa	Africa	1		26.8	20.6					0		settlers' diaries, explorers' journals, reports of scientific expeditions, historical chronicles documenting the reign of centuries of kings, oral tradition, missionary reports, and government records	not specified in paper	reports of famine, droughts, the character of the year's rainy season, agricultural failure or prosperity (conditions of crops); unusual weather, the status of vegetation and waterways; Hydrologic records (e.g. Nile, lake levels...); Rain gauge measurements	combination of documentary records, hydrologic records amd rain gauge measurements	seven-point ordinal index: -3/3= extremely dry, anomalously dry, dry, normal, wet, anomalously wet, to extremely wet	precipitation index	direct observed, measured	yes	i	snicholson@fsu.edu	Nicholson, Sharon E. "A Semi-Quantitative, Regional Precipitation Data Set for Studying African Climates of the Nineteenth Century, Part I. Overview of the Data Set." Climatic Change 50 (2001): 317-353. Nicholson, Sharon E. et al. “A Two-Century Precipitation Dataset for the Continent of Africa.” Bulletin of the American Meteorological Society 93 (2012a): 1219–31. Nicholson, Sharon E. et al. “Spa…	x	https://www.ncdc.noaa.gov/paleo-search/study/12207
110	p	precipitation	annual		1801	1900	100			Rainfall region 8	Africa	Africa	1		25.2	31.6					0		settlers' diaries, explorers' journals, reports of scientific expeditions, historical chronicles documenting the reign of centuries of kings, oral tradition, missionary reports, and government records	not specified in paper	reports of famine, droughts, the character of the year's rainy season, agricultural failure or prosperity (conditions of crops); unusual weather, the status of vegetation and waterways; Hydrologic records (e.g. Nile, lake levels...); Rain gauge measurements	combination of documentary records, hydrologic records amd rain gauge measurements	seven-point ordinal index: -3/3= extremely dry, anomalously dry, dry, normal, wet, anomalously wet, to extremely wet	precipitation index	direct observed, measured	yes	i	snicholson@fsu.edu	Nicholson, Sharon E. "A Semi-Quantitative, Regional Precipitation Data Set for Studying African Climates of the Nineteenth Century, Part I. Overview of the Data Set." Climatic Change 50 (2001): 317-353. Nicholson, Sharon E. et al. “A Two-Century Precipitation Dataset for the Continent of Africa.” Bulletin of the American Meteorological Society 93 (2012a): 1219–31. Nicholson, Sharon E. et al. “Spa…	x	https://www.ncdc.noaa.gov/paleo-search/study/12208
111	p	precipitation	annual		1801	1900	100			Rainfall region 9	Africa	Africa	1		20.5	-11.2					0		settlers' diaries, explorers' journals, reports of scientific expeditions, historical chronicles documenting the reign of centuries of kings, oral tradition, missionary reports, and government records	not specified in paper	reports of famine, droughts, the character of the year's rainy season, agricultural failure or prosperity (conditions of crops); unusual weather, the status of vegetation and waterways; Hydrologic records (e.g. Nile, lake levels...); Rain gauge measurements	combination of documentary records, hydrologic records amd rain gauge measurements	seven-point ordinal index: -3/3= extremely dry, anomalously dry, dry, normal, wet, anomalously wet, to extremely wet	precipitation index	direct observed, measured	yes	i	snicholson@fsu.edu	Nicholson, Sharon E. "A Semi-Quantitative, Regional Precipitation Data Set for Studying African Climates of the Nineteenth Century, Part I. Overview of the Data Set." Climatic Change 50 (2001): 317-353. Nicholson, Sharon E. et al. “A Two-Century Precipitation Dataset for the Continent of Africa.” Bulletin of the American Meteorological Society 93 (2012a): 1219–31. Nicholson, Sharon E. et al. “Spa…	x	https://www.ncdc.noaa.gov/paleo-search/study/12209
112	p	precipitation	annual		1801	1900	100			Rainfall region 10	Africa	Africa	1		21.5	-1.6					0		settlers' diaries, explorers' journals, reports of scientific expeditions, historical chronicles documenting the reign of centuries of kings, oral tradition, missionary reports, and government records	not specified in paper	reports of famine, droughts, the character of the year's rainy season, agricultural failure or prosperity (conditions of crops); unusual weather, the status of vegetation and waterways; Hydrologic records (e.g. Nile, lake levels...); Rain gauge measurements	combination of documentary records, hydrologic records amd rain gauge measurements	seven-point ordinal index: -3/3= extremely dry, anomalously dry, dry, normal, wet, anomalously wet, to extremely wet	precipitation index	direct observed, measured	yes	i	snicholson@fsu.edu	Nicholson, Sharon E. "A Semi-Quantitative, Regional Precipitation Data Set for Studying African Climates of the Nineteenth Century, Part I. Overview of the Data Set." Climatic Change 50 (2001): 317-353. Nicholson, Sharon E. et al. “A Two-Century Precipitation Dataset for the Continent of Africa.” Bulletin of the American Meteorological Society 93 (2012a): 1219–31. Nicholson, Sharon E. et al. “Spa…	x	https://www.ncdc.noaa.gov/paleo-search/study/12210
113	p	precipitation	annual		1801	1900	100			Rainfall region 11	Africa	Africa	1		19.2	15.6					0		settlers' diaries, explorers' journals, reports of scientific expeditions, historical chronicles documenting the reign of centuries of kings, oral tradition, missionary reports, and government records	not specified in paper	reports of famine, droughts, the character of the year's rainy season, agricultural failure or prosperity (conditions of crops); unusual weather, the status of vegetation and waterways; Hydrologic records (e.g. Nile, lake levels...); Rain gauge measurements	combination of documentary records, hydrologic records amd rain gauge measurements	seven-point ordinal index: -3/3= extremely dry, anomalously dry, dry, normal, wet, anomalously wet, to extremely wet	precipitation index	direct observed, measured	yes	i	snicholson@fsu.edu	Nicholson, Sharon E. "A Semi-Quantitative, Regional Precipitation Data Set for Studying African Climates of the Nineteenth Century, Part I. Overview of the Data Set." Climatic Change 50 (2001): 317-353. Nicholson, Sharon E. et al. “A Two-Century Precipitation Dataset for the Continent of Africa.” Bulletin of the American Meteorological Society 93 (2012a): 1219–31. Nicholson, Sharon E. et al. “Spa…	x	https://www.ncdc.noaa.gov/paleo-search/study/12211
114	p	precipitation	annual		1801	1900	100			Rainfall region 12	Africa	Africa	1		19.7	32.6					0		settlers' diaries, explorers' journals, reports of scientific expeditions, historical chronicles documenting the reign of centuries of kings, oral tradition, missionary reports, and government records	not specified in paper	reports of famine, droughts, the character of the year's rainy season, agricultural failure or prosperity (conditions of crops); unusual weather, the status of vegetation and waterways; Hydrologic records (e.g. Nile, lake levels...); Rain gauge measurements	combination of documentary records, hydrologic records amd rain gauge measurements	seven-point ordinal index: -3/3= extremely dry, anomalously dry, dry, normal, wet, anomalously wet, to extremely wet	precipitation index	direct observed, measured	yes	i	snicholson@fsu.edu	Nicholson, Sharon E. "A Semi-Quantitative, Regional Precipitation Data Set for Studying African Climates of the Nineteenth Century, Part I. Overview of the Data Set." Climatic Change 50 (2001): 317-353. Nicholson, Sharon E. et al. “A Two-Century Precipitation Dataset for the Continent of Africa.” Bulletin of the American Meteorological Society 93 (2012a): 1219–31. Nicholson, Sharon E. et al. “Spa…	x	https://www.ncdc.noaa.gov/paleo-search/study/12212
115	p	precipitation	annual		1801	1900	100			Rainfall region 13	Africa	Africa	1		17.2	-14.1					0		settlers' diaries, explorers' journals, reports of scientific expeditions, historical chronicles documenting the reign of centuries of kings, oral tradition, missionary reports, and government records	not specified in paper	reports of famine, droughts, the character of the year's rainy season, agricultural failure or prosperity (conditions of crops); unusual weather, the status of vegetation and waterways; Hydrologic records (e.g. Nile, lake levels...); Rain gauge measurements	combination of documentary records, hydrologic records amd rain gauge measurements	seven-point ordinal index: -3/3= extremely dry, anomalously dry, dry, normal, wet, anomalously wet, to extremely wet	precipitation index	direct observed, measured	yes	i	snicholson@fsu.edu	Nicholson, Sharon E. "A Semi-Quantitative, Regional Precipitation Data Set for Studying African Climates of the Nineteenth Century, Part I. Overview of the Data Set." Climatic Change 50 (2001): 317-353. Nicholson, Sharon E. et al. “A Two-Century Precipitation Dataset for the Continent of Africa.” Bulletin of the American Meteorological Society 93 (2012a): 1219–31. Nicholson, Sharon E. et al. “Spa…	x	https://www.ncdc.noaa.gov/paleo-search/study/12213
116	p	precipitation	annual		1801	1900	100			Rainfall region 14	Africa	Africa	1		16.2	-2.1					0		settlers' diaries, explorers' journals, reports of scientific expeditions, historical chronicles documenting the reign of centuries of kings, oral tradition, missionary reports, and government records	not specified in paper	reports of famine, droughts, the character of the year's rainy season, agricultural failure or prosperity (conditions of crops); unusual weather, the status of vegetation and waterways; Hydrologic records (e.g. Nile, lake levels...); Rain gauge measurements	combination of documentary records, hydrologic records amd rain gauge measurements	seven-point ordinal index: -3/3= extremely dry, anomalously dry, dry, normal, wet, anomalously wet, to extremely wet	precipitation index	direct observed, measured	yes	i	snicholson@fsu.edu	Nicholson, Sharon E. "A Semi-Quantitative, Regional Precipitation Data Set for Studying African Climates of the Nineteenth Century, Part I. Overview of the Data Set." Climatic Change 50 (2001): 317-353. Nicholson, Sharon E. et al. “A Two-Century Precipitation Dataset for the Continent of Africa.” Bulletin of the American Meteorological Society 93 (2012a): 1219–31. Nicholson, Sharon E. et al. “Spa…	x	https://www.ncdc.noaa.gov/paleo-search/study/12214
117	p	precipitation	annual		1801	1900	100			Rainfall region 15	Africa	Africa	1		14.6	11.5					0		settlers' diaries, explorers' journals, reports of scientific expeditions, historical chronicles documenting the reign of centuries of kings, oral tradition, missionary reports, and government records	not specified in paper	reports of famine, droughts, the character of the year's rainy season, agricultural failure or prosperity (conditions of crops); unusual weather, the status of vegetation and waterways; Hydrologic records (e.g. Nile, lake levels...); Rain gauge measurements	combination of documentary records, hydrologic records amd rain gauge measurements	seven-point ordinal index: -3/3= extremely dry, anomalously dry, dry, normal, wet, anomalously wet, to extremely wet	precipitation index	direct observed, measured	yes	i	snicholson@fsu.edu	Nicholson, Sharon E. "A Semi-Quantitative, Regional Precipitation Data Set for Studying African Climates of the Nineteenth Century, Part I. Overview of the Data Set." Climatic Change 50 (2001): 317-353. Nicholson, Sharon E. et al. “A Two-Century Precipitation Dataset for the Continent of Africa.” Bulletin of the American Meteorological Society 93 (2012a): 1219–31. Nicholson, Sharon E. et al. “Spa…	x	https://www.ncdc.noaa.gov/paleo-search/study/12215
118	p	precipitation	annual		1801	1900	100			Rainfall region 16	Africa	Africa	1		14	22.8					0		settlers' diaries, explorers' journals, reports of scientific expeditions, historical chronicles documenting the reign of centuries of kings, oral tradition, missionary reports, and government records	not specified in paper	reports of famine, droughts, the character of the year's rainy season, agricultural failure or prosperity (conditions of crops); unusual weather, the status of vegetation and waterways; Hydrologic records (e.g. Nile, lake levels...); Rain gauge measurements	combination of documentary records, hydrologic records amd rain gauge measurements	seven-point ordinal index: -3/3= extremely dry, anomalously dry, dry, normal, wet, anomalously wet, to extremely wet	precipitation index	direct observed, measured	yes	i	snicholson@fsu.edu	Nicholson, Sharon E. "A Semi-Quantitative, Regional Precipitation Data Set for Studying African Climates of the Nineteenth Century, Part I. Overview of the Data Set." Climatic Change 50 (2001): 317-353. Nicholson, Sharon E. et al. “A Two-Century Precipitation Dataset for the Continent of Africa.” Bulletin of the American Meteorological Society 93 (2012a): 1219–31. Nicholson, Sharon E. et al. “Spa…	x	https://www.ncdc.noaa.gov/paleo-search/study/12216
119	p	precipitation	annual		1801	1900	100			Rainfall region 17	Africa	Africa	1		13.6	30.5					0		settlers' diaries, explorers' journals, reports of scientific expeditions, historical chronicles documenting the reign of centuries of kings, oral tradition, missionary reports, and government records	not specified in paper	reports of famine, droughts, the character of the year's rainy season, agricultural failure or prosperity (conditions of crops); unusual weather, the status of vegetation and waterways; Hydrologic records (e.g. Nile, lake levels...); Rain gauge measurements	combination of documentary records, hydrologic records amd rain gauge measurements	seven-point ordinal index: -3/3= extremely dry, anomalously dry, dry, normal, wet, anomalously wet, to extremely wet	precipitation index	direct observed, measured	yes	i	snicholson@fsu.edu	Nicholson, Sharon E. "A Semi-Quantitative, Regional Precipitation Data Set for Studying African Climates of the Nineteenth Century, Part I. Overview of the Data Set." Climatic Change 50 (2001): 317-353. Nicholson, Sharon E. et al. “A Two-Century Precipitation Dataset for the Continent of Africa.” Bulletin of the American Meteorological Society 93 (2012a): 1219–31. Nicholson, Sharon E. et al. “Spa…	x	https://www.ncdc.noaa.gov/paleo-search/study/12217
120	p	precipitation	annual		1801	1900	100			Rainfall region 18	Africa	Africa	1		14	-12.1					0		settlers' diaries, explorers' journals, reports of scientific expeditions, historical chronicles documenting the reign of centuries of kings, oral tradition, missionary reports, and government records	not specified in paper	reports of famine, droughts, the character of the year's rainy season, agricultural failure or prosperity (conditions of crops); unusual weather, the status of vegetation and waterways; Hydrologic records (e.g. Nile, lake levels...); Rain gauge measurements	combination of documentary records, hydrologic records amd rain gauge measurements	seven-point ordinal index: -3/3= extremely dry, anomalously dry, dry, normal, wet, anomalously wet, to extremely wet	precipitation index	direct observed, measured	yes	i	snicholson@fsu.edu	Nicholson, Sharon E. "A Semi-Quantitative, Regional Precipitation Data Set for Studying African Climates of the Nineteenth Century, Part I. Overview of the Data Set." Climatic Change 50 (2001): 317-353. Nicholson, Sharon E. et al. “A Two-Century Precipitation Dataset for the Continent of Africa.” Bulletin of the American Meteorological Society 93 (2012a): 1219–31. Nicholson, Sharon E. et al. “Spa…	x	https://www.ncdc.noaa.gov/paleo-search/study/12218
121	p	precipitation	annual		1801	1900	100			Rainfall region 19	Africa	Africa	1		12.6	-2.6					0		settlers' diaries, explorers' journals, reports of scientific expeditions, historical chronicles documenting the reign of centuries of kings, oral tradition, missionary reports, and government records	not specified in paper	reports of famine, droughts, the character of the year's rainy season, agricultural failure or prosperity (conditions of crops); unusual weather, the status of vegetation and waterways; Hydrologic records (e.g. Nile, lake levels...); Rain gauge measurements	combination of documentary records, hydrologic records amd rain gauge measurements	seven-point ordinal index: -3/3= extremely dry, anomalously dry, dry, normal, wet, anomalously wet, to extremely wet	precipitation index	direct observed, measured	yes	i	snicholson@fsu.edu	Nicholson, Sharon E. "A Semi-Quantitative, Regional Precipitation Data Set for Studying African Climates of the Nineteenth Century, Part I. Overview of the Data Set." Climatic Change 50 (2001): 317-353. Nicholson, Sharon E. et al. “A Two-Century Precipitation Dataset for the Continent of Africa.” Bulletin of the American Meteorological Society 93 (2012a): 1219–31. Nicholson, Sharon E. et al. “Spa…	x	https://www.ncdc.noaa.gov/paleo-search/study/12219
122	p	precipitation	annual		1801	1900	100			Rainfall region 20	Africa	Africa	1		12.7	9.2					0		settlers' diaries, explorers' journals, reports of scientific expeditions, historical chronicles documenting the reign of centuries of kings, oral tradition, missionary reports, and government records	not specified in paper	reports of famine, droughts, the character of the year's rainy season, agricultural failure or prosperity (conditions of crops); unusual weather, the status of vegetation and waterways; Hydrologic records (e.g. Nile, lake levels...); Rain gauge measurements	combination of documentary records, hydrologic records amd rain gauge measurements	seven-point ordinal index: -3/3= extremely dry, anomalously dry, dry, normal, wet, anomalously wet, to extremely wet	precipitation index	direct observed, measured	yes	i	snicholson@fsu.edu	Nicholson, Sharon E. "A Semi-Quantitative, Regional Precipitation Data Set for Studying African Climates of the Nineteenth Century, Part I. Overview of the Data Set." Climatic Change 50 (2001): 317-353. Nicholson, Sharon E. et al. “A Two-Century Precipitation Dataset for the Continent of Africa.” Bulletin of the American Meteorological Society 93 (2012a): 1219–31. Nicholson, Sharon E. et al. “Spa…	x	https://www.ncdc.noaa.gov/paleo-search/study/12220
123	p	precipitation	annual		1801	1900	100			Rainfall region 21	Africa	Africa	1		10.5	19.1					0		settlers' diaries, explorers' journals, reports of scientific expeditions, historical chronicles documenting the reign of centuries of kings, oral tradition, missionary reports, and government records	not specified in paper	reports of famine, droughts, the character of the year's rainy season, agricultural failure or prosperity (conditions of crops); unusual weather, the status of vegetation and waterways; Hydrologic records (e.g. Nile, lake levels...); Rain gauge measurements	combination of documentary records, hydrologic records amd rain gauge measurements	seven-point ordinal index: -3/3= extremely dry, anomalously dry, dry, normal, wet, anomalously wet, to extremely wet	precipitation index	direct observed, measured	yes	i	snicholson@fsu.edu	Nicholson, Sharon E. "A Semi-Quantitative, Regional Precipitation Data Set for Studying African Climates of the Nineteenth Century, Part I. Overview of the Data Set." Climatic Change 50 (2001): 317-353. Nicholson, Sharon E. et al. “A Two-Century Precipitation Dataset for the Continent of Africa.” Bulletin of the American Meteorological Society 93 (2012a): 1219–31. Nicholson, Sharon E. et al. “Spa…	x	https://www.ncdc.noaa.gov/paleo-search/study/12221
124	p	precipitation	annual		1801	1900	100			Rainfall region 22	Africa	Africa	1		10.7	34.2					0		settlers' diaries, explorers' journals, reports of scientific expeditions, historical chronicles documenting the reign of centuries of kings, oral tradition, missionary reports, and government records	not specified in paper	reports of famine, droughts, the character of the year's rainy season, agricultural failure or prosperity (conditions of crops); unusual weather, the status of vegetation and waterways; Hydrologic records (e.g. Nile, lake levels...); Rain gauge measurements	combination of documentary records, hydrologic records amd rain gauge measurements	seven-point ordinal index: -3/3= extremely dry, anomalously dry, dry, normal, wet, anomalously wet, to extremely wet	precipitation index	direct observed, measured	yes	i	snicholson@fsu.edu	Nicholson, Sharon E. "A Semi-Quantitative, Regional Precipitation Data Set for Studying African Climates of the Nineteenth Century, Part I. Overview of the Data Set." Climatic Change 50 (2001): 317-353. Nicholson, Sharon E. et al. “A Two-Century Precipitation Dataset for the Continent of Africa.” Bulletin of the American Meteorological Society 93 (2012a): 1219–31. Nicholson, Sharon E. et al. “Spa…	x	https://www.ncdc.noaa.gov/paleo-search/study/12222
125	p	precipitation	annual		1801	1900	100			Rainfall region 23	Africa	Africa	1		9	-9.9					0		settlers' diaries, explorers' journals, reports of scientific expeditions, historical chronicles documenting the reign of centuries of kings, oral tradition, missionary reports, and government records	not specified in paper	reports of famine, droughts, the character of the year's rainy season, agricultural failure or prosperity (conditions of crops); unusual weather, the status of vegetation and waterways; Hydrologic records (e.g. Nile, lake levels...); Rain gauge measurements	combination of documentary records, hydrologic records amd rain gauge measurements	seven-point ordinal index: -3/3= extremely dry, anomalously dry, dry, normal, wet, anomalously wet, to extremely wet	precipitation index	direct observed, measured	yes	i	snicholson@fsu.edu	Nicholson, Sharon E. "A Semi-Quantitative, Regional Precipitation Data Set for Studying African Climates of the Nineteenth Century, Part I. Overview of the Data Set." Climatic Change 50 (2001): 317-353. Nicholson, Sharon E. et al. “A Two-Century Precipitation Dataset for the Continent of Africa.” Bulletin of the American Meteorological Society 93 (2012a): 1219–31. Nicholson, Sharon E. et al. “Spa…	x	https://www.ncdc.noaa.gov/paleo-search/study/12223
126	p	precipitation	annual		1801	1900	100			Rainfall region 24	Africa	Africa	1		10.1	1.1					0		settlers' diaries, explorers' journals, reports of scientific expeditions, historical chronicles documenting the reign of centuries of kings, oral tradition, missionary reports, and government records	not specified in paper	reports of famine, droughts, the character of the year's rainy season, agricultural failure or prosperity (conditions of crops); unusual weather, the status of vegetation and waterways; Hydrologic records (e.g. Nile, lake levels...); Rain gauge measurements	combination of documentary records, hydrologic records amd rain gauge measurements	seven-point ordinal index: -3/3= extremely dry, anomalously dry, dry, normal, wet, anomalously wet, to extremely wet	precipitation index	direct observed, measured	yes	i	snicholson@fsu.edu	Nicholson, Sharon E. "A Semi-Quantitative, Regional Precipitation Data Set for Studying African Climates of the Nineteenth Century, Part I. Overview of the Data Set." Climatic Change 50 (2001): 317-353. Nicholson, Sharon E. et al. “A Two-Century Precipitation Dataset for the Continent of Africa.” Bulletin of the American Meteorological Society 93 (2012a): 1219–31. Nicholson, Sharon E. et al. “Spa…	x	https://www.ncdc.noaa.gov/paleo-search/study/12224
127	p	precipitation	annual		1801	1900	100			Rainfall region 25	Africa	Africa	1		7.7	10.6					0		settlers' diaries, explorers' journals, reports of scientific expeditions, historical chronicles documenting the reign of centuries of kings, oral tradition, missionary reports, and government records	not specified in paper	reports of famine, droughts, the character of the year's rainy season, agricultural failure or prosperity (conditions of crops); unusual weather, the status of vegetation and waterways; Hydrologic records (e.g. Nile, lake levels...); Rain gauge measurements	combination of documentary records, hydrologic records amd rain gauge measurements	seven-point ordinal index: -3/3= extremely dry, anomalously dry, dry, normal, wet, anomalously wet, to extremely wet	precipitation index	direct observed, measured	yes	i	snicholson@fsu.edu	Nicholson, Sharon E. "A Semi-Quantitative, Regional Precipitation Data Set for Studying African Climates of the Nineteenth Century, Part I. Overview of the Data Set." Climatic Change 50 (2001): 317-353. Nicholson, Sharon E. et al. “A Two-Century Precipitation Dataset for the Continent of Africa.” Bulletin of the American Meteorological Society 93 (2012a): 1219–31. Nicholson, Sharon E. et al. “Spa…	x	https://www.ncdc.noaa.gov/paleo-search/study/12225
128	p	precipitation	annual		1801	1900	100			Rainfall region 26	Africa	Africa	1		7.1	16.4					0		settlers' diaries, explorers' journals, reports of scientific expeditions, historical chronicles documenting the reign of centuries of kings, oral tradition, missionary reports, and government records	not specified in paper	reports of famine, droughts, the character of the year's rainy season, agricultural failure or prosperity (conditions of crops); unusual weather, the status of vegetation and waterways; Hydrologic records (e.g. Nile, lake levels...); Rain gauge measurements	combination of documentary records, hydrologic records amd rain gauge measurements	seven-point ordinal index: -3/3= extremely dry, anomalously dry, dry, normal, wet, anomalously wet, to extremely wet	precipitation index	direct observed, measured	yes	i	snicholson@fsu.edu	Nicholson, Sharon E. "A Semi-Quantitative, Regional Precipitation Data Set for Studying African Climates of the Nineteenth Century, Part I. Overview of the Data Set." Climatic Change 50 (2001): 317-353. Nicholson, Sharon E. et al. “A Two-Century Precipitation Dataset for the Continent of Africa.” Bulletin of the American Meteorological Society 93 (2012a): 1219–31. Nicholson, Sharon E. et al. “Spa…	x	https://www.ncdc.noaa.gov/paleo-search/study/12226
129	p	precipitation	annual		1801	1900	100			Rainfall region 27	Africa	Africa	1		8.1	37					0		settlers' diaries, explorers' journals, reports of scientific expeditions, historical chronicles documenting the reign of centuries of kings, oral tradition, missionary reports, and government records	not specified in paper	reports of famine, droughts, the character of the year's rainy season, agricultural failure or prosperity (conditions of crops); unusual weather, the status of vegetation and waterways; Hydrologic records (e.g. Nile, lake levels...); Rain gauge measurements	combination of documentary records, hydrologic records amd rain gauge measurements	seven-point ordinal index: -3/3= extremely dry, anomalously dry, dry, normal, wet, anomalously wet, to extremely wet	precipitation index	direct observed, measured	yes	i	snicholson@fsu.edu	Nicholson, Sharon E. "A Semi-Quantitative, Regional Precipitation Data Set for Studying African Climates of the Nineteenth Century, Part I. Overview of the Data Set." Climatic Change 50 (2001): 317-353. Nicholson, Sharon E. et al. “A Two-Century Precipitation Dataset for the Continent of Africa.” Bulletin of the American Meteorological Society 93 (2012a): 1219–31. Nicholson, Sharon E. et al. “Spa…	x	https://www.ncdc.noaa.gov/paleo-search/study/12227
130	p	precipitation	annual		1801	1900	100			Rainfall region 28	Africa	Africa	1		6.8	-3.5					0		settlers' diaries, explorers' journals, reports of scientific expeditions, historical chronicles documenting the reign of centuries of kings, oral tradition, missionary reports, and government records	not specified in paper	reports of famine, droughts, the character of the year's rainy season, agricultural failure or prosperity (conditions of crops); unusual weather, the status of vegetation and waterways; Hydrologic records (e.g. Nile, lake levels...); Rain gauge measurements	combination of documentary records, hydrologic records amd rain gauge measurements	seven-point ordinal index: -3/3= extremely dry, anomalously dry, dry, normal, wet, anomalously wet, to extremely wet	precipitation index	direct observed, measured	yes	i	snicholson@fsu.edu	Nicholson, Sharon E. "A Semi-Quantitative, Regional Precipitation Data Set for Studying African Climates of the Nineteenth Century, Part I. Overview of the Data Set." Climatic Change 50 (2001): 317-353. Nicholson, Sharon E. et al. “A Two-Century Precipitation Dataset for the Continent of Africa.” Bulletin of the American Meteorological Society 93 (2012a): 1219–31. Nicholson, Sharon E. et al. “Spa…	x	https://www.ncdc.noaa.gov/paleo-search/study/12228
131	p	precipitation	annual		1801	1900	100			Rainfall region 29	Africa	Africa	1		6.8	6.4					0		settlers' diaries, explorers' journals, reports of scientific expeditions, historical chronicles documenting the reign of centuries of kings, oral tradition, missionary reports, and government records	not specified in paper	reports of famine, droughts, the character of the year's rainy season, agricultural failure or prosperity (conditions of crops); unusual weather, the status of vegetation and waterways; Hydrologic records (e.g. Nile, lake levels...); Rain gauge measurements	combination of documentary records, hydrologic records amd rain gauge measurements	seven-point ordinal index: -3/3= extremely dry, anomalously dry, dry, normal, wet, anomalously wet, to extremely wet	precipitation index	direct observed, measured	yes	i	snicholson@fsu.edu	Nicholson, Sharon E. "A Semi-Quantitative, Regional Precipitation Data Set for Studying African Climates of the Nineteenth Century, Part I. Overview of the Data Set." Climatic Change 50 (2001): 317-353. Nicholson, Sharon E. et al. “A Two-Century Precipitation Dataset for the Continent of Africa.” Bulletin of the American Meteorological Society 93 (2012a): 1219–31. Nicholson, Sharon E. et al. “Spa…	x	https://www.ncdc.noaa.gov/paleo-search/study/12229
132	p	precipitation	annual		1801	1900	100			Rainfall region 30	Africa	Africa	1		-2.3	22.6					0		settlers' diaries, explorers' journals, reports of scientific expeditions, historical chronicles documenting the reign of centuries of kings, oral tradition, missionary reports, and government records	not specified in paper	reports of famine, droughts, the character of the year's rainy season, agricultural failure or prosperity (conditions of crops); unusual weather, the status of vegetation and waterways; Hydrologic records (e.g. Nile, lake levels...); Rain gauge measurements	combination of documentary records, hydrologic records amd rain gauge measurements	seven-point ordinal index: -3/3= extremely dry, anomalously dry, dry, normal, wet, anomalously wet, to extremely wet	precipitation index	direct observed, measured	yes	i	snicholson@fsu.edu	Nicholson, Sharon E. "A Semi-Quantitative, Regional Precipitation Data Set for Studying African Climates of the Nineteenth Century, Part I. Overview of the Data Set." Climatic Change 50 (2001): 317-353. Nicholson, Sharon E. et al. “A Two-Century Precipitation Dataset for the Continent of Africa.” Bulletin of the American Meteorological Society 93 (2012a): 1219–31. Nicholson, Sharon E. et al. “Spa…	x	https://www.ncdc.noaa.gov/paleo-search/study/12230
133	p	precipitation	annual		1801	1900	100			Rainfall region 31	Africa	Africa	1		2.4	30.8					0		settlers' diaries, explorers' journals, reports of scientific expeditions, historical chronicles documenting the reign of centuries of kings, oral tradition, missionary reports, and government records	not specified in paper	reports of famine, droughts, the character of the year's rainy season, agricultural failure or prosperity (conditions of crops); unusual weather, the status of vegetation and waterways; Hydrologic records (e.g. Nile, lake levels...); Rain gauge measurements	combination of documentary records, hydrologic records amd rain gauge measurements	seven-point ordinal index: -3/3= extremely dry, anomalously dry, dry, normal, wet, anomalously wet, to extremely wet	precipitation index	direct observed, measured	yes	i	snicholson@fsu.edu	Nicholson, Sharon E. "A Semi-Quantitative, Regional Precipitation Data Set for Studying African Climates of the Nineteenth Century, Part I. Overview of the Data Set." Climatic Change 50 (2001): 317-353. Nicholson, Sharon E. et al. “A Two-Century Precipitation Dataset for the Continent of Africa.” Bulletin of the American Meteorological Society 93 (2012a): 1219–31. Nicholson, Sharon E. et al. “Spa…	x	https://www.ncdc.noaa.gov/paleo-search/study/12231
134	p	precipitation	annual		1801	1900	100			Rainfall region 32	Africa	Africa	1		-2	30.4					0		settlers' diaries, explorers' journals, reports of scientific expeditions, historical chronicles documenting the reign of centuries of kings, oral tradition, missionary reports, and government records	not specified in paper	reports of famine, droughts, the character of the year's rainy season, agricultural failure or prosperity (conditions of crops); unusual weather, the status of vegetation and waterways; Hydrologic records (e.g. Nile, lake levels...); Rain gauge measurements	combination of documentary records, hydrologic records amd rain gauge measurements	seven-point ordinal index: -3/3= extremely dry, anomalously dry, dry, normal, wet, anomalously wet, to extremely wet	precipitation index	direct observed, measured	yes	i	snicholson@fsu.edu	Nicholson, Sharon E. "A Semi-Quantitative, Regional Precipitation Data Set for Studying African Climates of the Nineteenth Century, Part I. Overview of the Data Set." Climatic Change 50 (2001): 317-353. Nicholson, Sharon E. et al. “A Two-Century Precipitation Dataset for the Continent of Africa.” Bulletin of the American Meteorological Society 93 (2012a): 1219–31. Nicholson, Sharon E. et al. “Spa…	x	https://www.ncdc.noaa.gov/paleo-search/study/12232
135	p	precipitation	annual		1801	1900	100			Rainfall region 33	Africa	Africa	1		2.8	38.7					0		settlers' diaries, explorers' journals, reports of scientific expeditions, historical chronicles documenting the reign of centuries of kings, oral tradition, missionary reports, and government records	not specified in paper	reports of famine, droughts, the character of the year's rainy season, agricultural failure or prosperity (conditions of crops); unusual weather, the status of vegetation and waterways; Hydrologic records (e.g. Nile, lake levels...); Rain gauge measurements	combination of documentary records, hydrologic records amd rain gauge measurements	seven-point ordinal index: -3/3= extremely dry, anomalously dry, dry, normal, wet, anomalously wet, to extremely wet	precipitation index	direct observed, measured	yes	i	snicholson@fsu.edu	Nicholson, Sharon E. "A Semi-Quantitative, Regional Precipitation Data Set for Studying African Climates of the Nineteenth Century, Part I. Overview of the Data Set." Climatic Change 50 (2001): 317-353. Nicholson, Sharon E. et al. “A Two-Century Precipitation Dataset for the Continent of Africa.” Bulletin of the American Meteorological Society 93 (2012a): 1219–31. Nicholson, Sharon E. et al. “Spa…	x	https://www.ncdc.noaa.gov/paleo-search/study/12233
136	p	precipitation	annual		1801	1900	100			Rainfall region 34	Africa	Africa	1		3.7	23.9					0		settlers' diaries, explorers' journals, reports of scientific expeditions, historical chronicles documenting the reign of centuries of kings, oral tradition, missionary reports, and government records	not specified in paper	reports of famine, droughts, the character of the year's rainy season, agricultural failure or prosperity (conditions of crops); unusual weather, the status of vegetation and waterways; Hydrologic records (e.g. Nile, lake levels...); Rain gauge measurements	combination of documentary records, hydrologic records amd rain gauge measurements	seven-point ordinal index: -3/3= extremely dry, anomalously dry, dry, normal, wet, anomalously wet, to extremely wet	precipitation index	direct observed, measured	yes	i	snicholson@fsu.edu	Nicholson, Sharon E. "A Semi-Quantitative, Regional Precipitation Data Set for Studying African Climates of the Nineteenth Century, Part I. Overview of the Data Set." Climatic Change 50 (2001): 317-353. Nicholson, Sharon E. et al. “A Two-Century Precipitation Dataset for the Continent of Africa.” Bulletin of the American Meteorological Society 93 (2012a): 1219–31. Nicholson, Sharon E. et al. “Spa…	x	https://www.ncdc.noaa.gov/paleo-search/study/12234
137	p	precipitation	annual		1801	1900	100			Rainfall region 35	Africa	Africa	1		4.3	19.3					0		settlers' diaries, explorers' journals, reports of scientific expeditions, historical chronicles documenting the reign of centuries of kings, oral tradition, missionary reports, and government records	not specified in paper	reports of famine, droughts, the character of the year's rainy season, agricultural failure or prosperity (conditions of crops); unusual weather, the status of vegetation and waterways; Hydrologic records (e.g. Nile, lake levels...); Rain gauge measurements	combination of documentary records, hydrologic records amd rain gauge measurements	seven-point ordinal index: -3/3= extremely dry, anomalously dry, dry, normal, wet, anomalously wet, to extremely wet	precipitation index	direct observed, measured	yes	i	snicholson@fsu.edu	Nicholson, Sharon E. "A Semi-Quantitative, Regional Precipitation Data Set for Studying African Climates of the Nineteenth Century, Part I. Overview of the Data Set." Climatic Change 50 (2001): 317-353. Nicholson, Sharon E. et al. “A Two-Century Precipitation Dataset for the Continent of Africa.” Bulletin of the American Meteorological Society 93 (2012a): 1219–31. Nicholson, Sharon E. et al. “Spa…	x	https://www.ncdc.noaa.gov/paleo-search/study/12235
138	p	precipitation	annual		1801	1900	100			Rainfall region 36	Africa	Africa	1		2.9	14.1					0		settlers' diaries, explorers' journals, reports of scientific expeditions, historical chronicles documenting the reign of centuries of kings, oral tradition, missionary reports, and government records	not specified in paper	reports of famine, droughts, the character of the year's rainy season, agricultural failure or prosperity (conditions of crops); unusual weather, the status of vegetation and waterways; Hydrologic records (e.g. Nile, lake levels...); Rain gauge measurements	combination of documentary records, hydrologic records amd rain gauge measurements	seven-point ordinal index: -3/3= extremely dry, anomalously dry, dry, normal, wet, anomalously wet, to extremely wet	precipitation index	direct observed, measured	yes	i	snicholson@fsu.edu	Nicholson, Sharon E. "A Semi-Quantitative, Regional Precipitation Data Set for Studying African Climates of the Nineteenth Century, Part I. Overview of the Data Set." Climatic Change 50 (2001): 317-353. Nicholson, Sharon E. et al. “A Two-Century Precipitation Dataset for the Continent of Africa.” Bulletin of the American Meteorological Society 93 (2012a): 1219–31. Nicholson, Sharon E. et al. “Spa…	x	https://www.ncdc.noaa.gov/paleo-search/study/12236
139	p	precipitation	annual		1801	1900	100			Rainfall region 37	Africa	Africa	1		-5.4	38.2					0		settlers' diaries, explorers' journals, reports of scientific expeditions, historical chronicles documenting the reign of centuries of kings, oral tradition, missionary reports, and government records	not specified in paper	reports of famine, droughts, the character of the year's rainy season, agricultural failure or prosperity (conditions of crops); unusual weather, the status of vegetation and waterways; Hydrologic records (e.g. Nile, lake levels...); Rain gauge measurements	combination of documentary records, hydrologic records amd rain gauge measurements	seven-point ordinal index: -3/3= extremely dry, anomalously dry, dry, normal, wet, anomalously wet, to extremely wet	precipitation index	direct observed, measured	yes	i	snicholson@fsu.edu	Nicholson, Sharon E. "A Semi-Quantitative, Regional Precipitation Data Set for Studying African Climates of the Nineteenth Century, Part I. Overview of the Data Set." Climatic Change 50 (2001): 317-353. Nicholson, Sharon E. et al. “A Two-Century Precipitation Dataset for the Continent of Africa.” Bulletin of the American Meteorological Society 93 (2012a): 1219–31. Nicholson, Sharon E. et al. “Spa…	x	https://www.ncdc.noaa.gov/paleo-search/study/12237
140	p	precipitation	annual		1801	1900	100			Rainfall region 38	Africa	Africa	1		-7.8	34.9					0		settlers' diaries, explorers' journals, reports of scientific expeditions, historical chronicles documenting the reign of centuries of kings, oral tradition, missionary reports, and government records	not specified in paper	reports of famine, droughts, the character of the year's rainy season, agricultural failure or prosperity (conditions of crops); unusual weather, the status of vegetation and waterways; Hydrologic records (e.g. Nile, lake levels...); Rain gauge measurements	combination of documentary records, hydrologic records amd rain gauge measurements	seven-point ordinal index: -3/3= extremely dry, anomalously dry, dry, normal, wet, anomalously wet, to extremely wet	precipitation index	direct observed, measured	yes	i	snicholson@fsu.edu	Nicholson, Sharon E. "A Semi-Quantitative, Regional Precipitation Data Set for Studying African Climates of the Nineteenth Century, Part I. Overview of the Data Set." Climatic Change 50 (2001): 317-353. Nicholson, Sharon E. et al. “A Two-Century Precipitation Dataset for the Continent of Africa.” Bulletin of the American Meteorological Society 93 (2012a): 1219–31. Nicholson, Sharon E. et al. “Spa…	x	https://www.ncdc.noaa.gov/paleo-search/study/12238
141	p	precipitation	annual		1801	1900	100			Rainfall region 39	Africa	Africa	1		-7	28.7					0		settlers' diaries, explorers' journals, reports of scientific expeditions, historical chronicles documenting the reign of centuries of kings, oral tradition, missionary reports, and government records	not specified in paper	reports of famine, droughts, the character of the year's rainy season, agricultural failure or prosperity (conditions of crops); unusual weather, the status of vegetation and waterways; Hydrologic records (e.g. Nile, lake levels...); Rain gauge measurements	combination of documentary records, hydrologic records amd rain gauge measurements	seven-point ordinal index: -3/3= extremely dry, anomalously dry, dry, normal, wet, anomalously wet, to extremely wet	precipitation index	direct observed, measured	yes	i	snicholson@fsu.edu	Nicholson, Sharon E. "A Semi-Quantitative, Regional Precipitation Data Set for Studying African Climates of the Nineteenth Century, Part I. Overview of the Data Set." Climatic Change 50 (2001): 317-353. Nicholson, Sharon E. et al. “A Two-Century Precipitation Dataset for the Continent of Africa.” Bulletin of the American Meteorological Society 93 (2012a): 1219–31. Nicholson, Sharon E. et al. “Spa…	x	https://www.ncdc.noaa.gov/paleo-search/study/12239
142	p	precipitation	annual		1801	1900	100			Rainfall region 40	Africa	Africa	1		-6	19.2					0		settlers' diaries, explorers' journals, reports of scientific expeditions, historical chronicles documenting the reign of centuries of kings, oral tradition, missionary reports, and government records	not specified in paper	reports of famine, droughts, the character of the year's rainy season, agricultural failure or prosperity (conditions of crops); unusual weather, the status of vegetation and waterways; Hydrologic records (e.g. Nile, lake levels...); Rain gauge measurements	combination of documentary records, hydrologic records amd rain gauge measurements	seven-point ordinal index: -3/3= extremely dry, anomalously dry, dry, normal, wet, anomalously wet, to extremely wet	precipitation index	direct observed, measured	yes	i	snicholson@fsu.edu	Nicholson, Sharon E. "A Semi-Quantitative, Regional Precipitation Data Set for Studying African Climates of the Nineteenth Century, Part I. Overview of the Data Set." Climatic Change 50 (2001): 317-353. Nicholson, Sharon E. et al. “A Two-Century Precipitation Dataset for the Continent of Africa.” Bulletin of the American Meteorological Society 93 (2012a): 1219–31. Nicholson, Sharon E. et al. “Spa…	x	https://www.ncdc.noaa.gov/paleo-search/study/12240
143	p	precipitation	annual		1801	1900	100			Rainfall region 41	Africa	Africa	1		-7	23.7					0		settlers' diaries, explorers' journals, reports of scientific expeditions, historical chronicles documenting the reign of centuries of kings, oral tradition, missionary reports, and government records	not specified in paper	reports of famine, droughts, the character of the year's rainy season, agricultural failure or prosperity (conditions of crops); unusual weather, the status of vegetation and waterways; Hydrologic records (e.g. Nile, lake levels...); Rain gauge measurements	combination of documentary records, hydrologic records amd rain gauge measurements	seven-point ordinal index: -3/3= extremely dry, anomalously dry, dry, normal, wet, anomalously wet, to extremely wet	precipitation index	direct observed, measured	yes	i	snicholson@fsu.edu	Nicholson, Sharon E. "A Semi-Quantitative, Regional Precipitation Data Set for Studying African Climates of the Nineteenth Century, Part I. Overview of the Data Set." Climatic Change 50 (2001): 317-353. Nicholson, Sharon E. et al. “A Two-Century Precipitation Dataset for the Continent of Africa.” Bulletin of the American Meteorological Society 93 (2012a): 1219–31. Nicholson, Sharon E. et al. “Spa…	x	https://www.ncdc.noaa.gov/paleo-search/study/12241
144	p	precipitation	annual		1801	1900	100			Rainfall region 42	Africa	Africa	1		-2.1	15.5					0		settlers' diaries, explorers' journals, reports of scientific expeditions, historical chronicles documenting the reign of centuries of kings, oral tradition, missionary reports, and government records	not specified in paper	reports of famine, droughts, the character of the year's rainy season, agricultural failure or prosperity (conditions of crops); unusual weather, the status of vegetation and waterways; Hydrologic records (e.g. Nile, lake levels...); Rain gauge measurements	combination of documentary records, hydrologic records amd rain gauge measurements	seven-point ordinal index: -3/3= extremely dry, anomalously dry, dry, normal, wet, anomalously wet, to extremely wet	precipitation index	direct observed, measured	yes	i	snicholson@fsu.edu	Nicholson, Sharon E. "A Semi-Quantitative, Regional Precipitation Data Set for Studying African Climates of the Nineteenth Century, Part I. Overview of the Data Set." Climatic Change 50 (2001): 317-353. Nicholson, Sharon E. et al. “A Two-Century Precipitation Dataset for the Continent of Africa.” Bulletin of the American Meteorological Society 93 (2012a): 1219–31. Nicholson, Sharon E. et al. “Spa…	x	https://www.ncdc.noaa.gov/paleo-search/study/12242
145	p	precipitation	annual		1801	1900	100			Rainfall region 43	Africa	Africa	1		-11.7	32.6					0		settlers' diaries, explorers' journals, reports of scientific expeditions, historical chronicles documenting the reign of centuries of kings, oral tradition, missionary reports, and government records	not specified in paper	reports of famine, droughts, the character of the year's rainy season, agricultural failure or prosperity (conditions of crops); unusual weather, the status of vegetation and waterways; Hydrologic records (e.g. Nile, lake levels...); Rain gauge measurements	combination of documentary records, hydrologic records amd rain gauge measurements	seven-point ordinal index: -3/3= extremely dry, anomalously dry, dry, normal, wet, anomalously wet, to extremely wet	precipitation index	direct observed, measured	yes	i	snicholson@fsu.edu	Nicholson, Sharon E. "A Semi-Quantitative, Regional Precipitation Data Set for Studying African Climates of the Nineteenth Century, Part I. Overview of the Data Set." Climatic Change 50 (2001): 317-353. Nicholson, Sharon E. et al. “A Two-Century Precipitation Dataset for the Continent of Africa.” Bulletin of the American Meteorological Society 93 (2012a): 1219–31. Nicholson, Sharon E. et al. “Spa…	x	https://www.ncdc.noaa.gov/paleo-search/study/12243
146	p	precipitation	annual		1801	1900	100			Rainfall region 44	Africa	Africa	1		-11	26.3					0		settlers' diaries, explorers' journals, reports of scientific expeditions, historical chronicles documenting the reign of centuries of kings, oral tradition, missionary reports, and government records	not specified in paper	reports of famine, droughts, the character of the year's rainy season, agricultural failure or prosperity (conditions of crops); unusual weather, the status of vegetation and waterways; Hydrologic records (e.g. Nile, lake levels...); Rain gauge measurements	combination of documentary records, hydrologic records amd rain gauge measurements	seven-point ordinal index: -3/3= extremely dry, anomalously dry, dry, normal, wet, anomalously wet, to extremely wet	precipitation index	direct observed, measured	yes	i	snicholson@fsu.edu	Nicholson, Sharon E. "A Semi-Quantitative, Regional Precipitation Data Set for Studying African Climates of the Nineteenth Century, Part I. Overview of the Data Set." Climatic Change 50 (2001): 317-353. Nicholson, Sharon E. et al. “A Two-Century Precipitation Dataset for the Continent of Africa.” Bulletin of the American Meteorological Society 93 (2012a): 1219–31. Nicholson, Sharon E. et al. “Spa…	x	https://www.ncdc.noaa.gov/paleo-search/study/12244
147	p	precipitation	annual		1801	1900	100			Rainfall region 45	Africa	Africa	1		16.4	39.6					0		settlers' diaries, explorers' journals, reports of scientific expeditions, historical chronicles documenting the reign of centuries of kings, oral tradition, missionary reports, and government records	not specified in paper	reports of famine, droughts, the character of the year's rainy season, agricultural failure or prosperity (conditions of crops); unusual weather, the status of vegetation and waterways; Hydrologic records (e.g. Nile, lake levels...); Rain gauge measurements	combination of documentary records, hydrologic records amd rain gauge measurements	seven-point ordinal index: -3/3= extremely dry, anomalously dry, dry, normal, wet, anomalously wet, to extremely wet	precipitation index	direct observed, measured	yes	i	snicholson@fsu.edu	Nicholson, Sharon E. "A Semi-Quantitative, Regional Precipitation Data Set for Studying African Climates of the Nineteenth Century, Part I. Overview of the Data Set." Climatic Change 50 (2001): 317-353. Nicholson, Sharon E. et al. “A Two-Century Precipitation Dataset for the Continent of Africa.” Bulletin of the American Meteorological Society 93 (2012a): 1219–31. Nicholson, Sharon E. et al. “Spa…	x	https://www.ncdc.noaa.gov/paleo-search/study/12245
148	p	precipitation	annual		1801	1900	100			Rainfall region 46	Africa	Africa	1		-9.1	15.9					0		settlers' diaries, explorers' journals, reports of scientific expeditions, historical chronicles documenting the reign of centuries of kings, oral tradition, missionary reports, and government records	not specified in paper	reports of famine, droughts, the character of the year's rainy season, agricultural failure or prosperity (conditions of crops); unusual weather, the status of vegetation and waterways; Hydrologic records (e.g. Nile, lake levels...); Rain gauge measurements	combination of documentary records, hydrologic records amd rain gauge measurements	seven-point ordinal index: -3/3= extremely dry, anomalously dry, dry, normal, wet, anomalously wet, to extremely wet	precipitation index	direct observed, measured	yes	i	snicholson@fsu.edu	Nicholson, Sharon E. "A Semi-Quantitative, Regional Precipitation Data Set for Studying African Climates of the Nineteenth Century, Part I. Overview of the Data Set." Climatic Change 50 (2001): 317-353. Nicholson, Sharon E. et al. “A Two-Century Precipitation Dataset for the Continent of Africa.” Bulletin of the American Meteorological Society 93 (2012a): 1219–31. Nicholson, Sharon E. et al. “Spa…	x	https://www.ncdc.noaa.gov/paleo-search/study/12246
149	p	precipitation	annual		1801	1900	100			Rainfall region 47	Africa	Africa	1		-10.6	13.1					0		settlers' diaries, explorers' journals, reports of scientific expeditions, historical chronicles documenting the reign of centuries of kings, oral tradition, missionary reports, and government records	not specified in paper	reports of famine, droughts, the character of the year's rainy season, agricultural failure or prosperity (conditions of crops); unusual weather, the status of vegetation and waterways; Hydrologic records (e.g. Nile, lake levels...); Rain gauge measurements	combination of documentary records, hydrologic records amd rain gauge measurements	seven-point ordinal index: -3/3= extremely dry, anomalously dry, dry, normal, wet, anomalously wet, to extremely wet	precipitation index	direct observed, measured	yes	i	snicholson@fsu.edu	Nicholson, Sharon E. "A Semi-Quantitative, Regional Precipitation Data Set for Studying African Climates of the Nineteenth Century, Part I. Overview of the Data Set." Climatic Change 50 (2001): 317-353. Nicholson, Sharon E. et al. “A Two-Century Precipitation Dataset for the Continent of Africa.” Bulletin of the American Meteorological Society 93 (2012a): 1219–31. Nicholson, Sharon E. et al. “Spa…	x	https://www.ncdc.noaa.gov/paleo-search/study/12247
150	p	precipitation	annual		1801	1900	100			Rainfall region 48	Africa	Africa	1		-14.7	25.5					0		settlers' diaries, explorers' journals, reports of scientific expeditions, historical chronicles documenting the reign of centuries of kings, oral tradition, missionary reports, and government records	not specified in paper	reports of famine, droughts, the character of the year's rainy season, agricultural failure or prosperity (conditions of crops); unusual weather, the status of vegetation and waterways; Hydrologic records (e.g. Nile, lake levels...); Rain gauge measurements	combination of documentary records, hydrologic records amd rain gauge measurements	seven-point ordinal index: -3/3= extremely dry, anomalously dry, dry, normal, wet, anomalously wet, to extremely wet	precipitation index	direct observed, measured	yes	i	snicholson@fsu.edu	Nicholson, Sharon E. "A Semi-Quantitative, Regional Precipitation Data Set for Studying African Climates of the Nineteenth Century, Part I. Overview of the Data Set." Climatic Change 50 (2001): 317-353. Nicholson, Sharon E. et al. “A Two-Century Precipitation Dataset for the Continent of Africa.” Bulletin of the American Meteorological Society 93 (2012a): 1219–31. Nicholson, Sharon E. et al. “Spa…	x	https://www.ncdc.noaa.gov/paleo-search/study/12248
151	p	precipitation	annual		1801	1900	100			Rainfall region 49	Africa	Africa	1		-11.3	17.3					0		settlers' diaries, explorers' journals, reports of scientific expeditions, historical chronicles documenting the reign of centuries of kings, oral tradition, missionary reports, and government records	not specified in paper	reports of famine, droughts, the character of the year's rainy season, agricultural failure or prosperity (conditions of crops); unusual weather, the status of vegetation and waterways; Hydrologic records (e.g. Nile, lake levels...); Rain gauge measurements	combination of documentary records, hydrologic records amd rain gauge measurements	seven-point ordinal index: -3/3= extremely dry, anomalously dry, dry, normal, wet, anomalously wet, to extremely wet	precipitation index	direct observed, measured	yes	i	snicholson@fsu.edu	Nicholson, Sharon E. "A Semi-Quantitative, Regional Precipitation Data Set for Studying African Climates of the Nineteenth Century, Part I. Overview of the Data Set." Climatic Change 50 (2001): 317-353. Nicholson, Sharon E. et al. “A Two-Century Precipitation Dataset for the Continent of Africa.” Bulletin of the American Meteorological Society 93 (2012a): 1219–31. Nicholson, Sharon E. et al. “Spa…	x	https://www.ncdc.noaa.gov/paleo-search/study/12249
152	p	precipitation	annual		1801	1900	100			Rainfall region 50	Africa	Africa	1		-13.2	18.5					0		settlers' diaries, explorers' journals, reports of scientific expeditions, historical chronicles documenting the reign of centuries of kings, oral tradition, missionary reports, and government records	not specified in paper	reports of famine, droughts, the character of the year's rainy season, agricultural failure or prosperity (conditions of crops); unusual weather, the status of vegetation and waterways; Hydrologic records (e.g. Nile, lake levels...); Rain gauge measurements	combination of documentary records, hydrologic records amd rain gauge measurements	seven-point ordinal index: -3/3= extremely dry, anomalously dry, dry, normal, wet, anomalously wet, to extremely wet	precipitation index	direct observed, measured	yes	i	snicholson@fsu.edu	Nicholson, Sharon E. "A Semi-Quantitative, Regional Precipitation Data Set for Studying African Climates of the Nineteenth Century, Part I. Overview of the Data Set." Climatic Change 50 (2001): 317-353. Nicholson, Sharon E. et al. “A Two-Century Precipitation Dataset for the Continent of Africa.” Bulletin of the American Meteorological Society 93 (2012a): 1219–31. Nicholson, Sharon E. et al. “Spa…	x	https://www.ncdc.noaa.gov/paleo-search/study/12250
153	p	precipitation	annual		1801	1900	100			Rainfall region 51	Africa	Africa	1		-3.9	12.8					0		settlers' diaries, explorers' journals, reports of scientific expeditions, historical chronicles documenting the reign of centuries of kings, oral tradition, missionary reports, and government records	not specified in paper	reports of famine, droughts, the character of the year's rainy season, agricultural failure or prosperity (conditions of crops); unusual weather, the status of vegetation and waterways; Hydrologic records (e.g. Nile, lake levels...); Rain gauge measurements	combination of documentary records, hydrologic records amd rain gauge measurements	seven-point ordinal index: -3/3= extremely dry, anomalously dry, dry, normal, wet, anomalously wet, to extremely wet	precipitation index	direct observed, measured	yes	i	snicholson@fsu.edu	Nicholson, Sharon E. "A Semi-Quantitative, Regional Precipitation Data Set for Studying African Climates of the Nineteenth Century, Part I. Overview of the Data Set." Climatic Change 50 (2001): 317-353. Nicholson, Sharon E. et al. “A Two-Century Precipitation Dataset for the Continent of Africa.” Bulletin of the American Meteorological Society 93 (2012a): 1219–31. Nicholson, Sharon E. et al. “Spa…	x	https://www.ncdc.noaa.gov/paleo-search/study/12251
154	p	precipitation	annual		1801	1900	100			Rainfall region 52	Africa	Africa	1		-16.2	14.8					0		settlers' diaries, explorers' journals, reports of scientific expeditions, historical chronicles documenting the reign of centuries of kings, oral tradition, missionary reports, and government records	not specified in paper	reports of famine, droughts, the character of the year's rainy season, agricultural failure or prosperity (conditions of crops); unusual weather, the status of vegetation and waterways; Hydrologic records (e.g. Nile, lake levels...); Rain gauge measurements	combination of documentary records, hydrologic records amd rain gauge measurements	seven-point ordinal index: -3/3= extremely dry, anomalously dry, dry, normal, wet, anomalously wet, to extremely wet	precipitation index	direct observed, measured	yes	i	snicholson@fsu.edu	Nicholson, Sharon E. "A Semi-Quantitative, Regional Precipitation Data Set for Studying African Climates of the Nineteenth Century, Part I. Overview of the Data Set." Climatic Change 50 (2001): 317-353. Nicholson, Sharon E. et al. “A Two-Century Precipitation Dataset for the Continent of Africa.” Bulletin of the American Meteorological Society 93 (2012a): 1219–31. Nicholson, Sharon E. et al. “Spa…	x	https://www.ncdc.noaa.gov/paleo-search/study/12252
155	p	precipitation	annual		1801	1900	100			Rainfall region 53	Africa	Africa	1		-12.1	38					0		settlers' diaries, explorers' journals, reports of scientific expeditions, historical chronicles documenting the reign of centuries of kings, oral tradition, missionary reports, and government records	not specified in paper	reports of famine, droughts, the character of the year's rainy season, agricultural failure or prosperity (conditions of crops); unusual weather, the status of vegetation and waterways; Hydrologic records (e.g. Nile, lake levels...); Rain gauge measurements	combination of documentary records, hydrologic records amd rain gauge measurements	seven-point ordinal index: -3/3= extremely dry, anomalously dry, dry, normal, wet, anomalously wet, to extremely wet	precipitation index	direct observed, measured	yes	i	snicholson@fsu.edu	Nicholson, Sharon E. "A Semi-Quantitative, Regional Precipitation Data Set for Studying African Climates of the Nineteenth Century, Part I. Overview of the Data Set." Climatic Change 50 (2001): 317-353. Nicholson, Sharon E. et al. “A Two-Century Precipitation Dataset for the Continent of Africa.” Bulletin of the American Meteorological Society 93 (2012a): 1219–31. Nicholson, Sharon E. et al. “Spa…	x	https://www.ncdc.noaa.gov/paleo-search/study/12253
156	p	precipitation	annual		1801	1900	100			Rainfall region 54	Africa	Africa	1		-13.2	35					0		settlers' diaries, explorers' journals, reports of scientific expeditions, historical chronicles documenting the reign of centuries of kings, oral tradition, missionary reports, and government records	not specified in paper	reports of famine, droughts, the character of the year's rainy season, agricultural failure or prosperity (conditions of crops); unusual weather, the status of vegetation and waterways; Hydrologic records (e.g. Nile, lake levels...); Rain gauge measurements	combination of documentary records, hydrologic records amd rain gauge measurements	seven-point ordinal index: -3/3= extremely dry, anomalously dry, dry, normal, wet, anomalously wet, to extremely wet	precipitation index	direct observed, measured	yes	i	snicholson@fsu.edu	Nicholson, Sharon E. "A Semi-Quantitative, Regional Precipitation Data Set for Studying African Climates of the Nineteenth Century, Part I. Overview of the Data Set." Climatic Change 50 (2001): 317-353. Nicholson, Sharon E. et al. “A Two-Century Precipitation Dataset for the Continent of Africa.” Bulletin of the American Meteorological Society 93 (2012a): 1219–31. Nicholson, Sharon E. et al. “Spa…	x	https://www.ncdc.noaa.gov/paleo-search/study/12254
157	p	precipitation	annual		1801	1900	100			Rainfall region 55	Africa	Africa	1		-16.1	36.2					0		settlers' diaries, explorers' journals, reports of scientific expeditions, historical chronicles documenting the reign of centuries of kings, oral tradition, missionary reports, and government records	not specified in paper	reports of famine, droughts, the character of the year's rainy season, agricultural failure or prosperity (conditions of crops); unusual weather, the status of vegetation and waterways; Hydrologic records (e.g. Nile, lake levels...); Rain gauge measurements	combination of documentary records, hydrologic records amd rain gauge measurements	seven-point ordinal index: -3/3= extremely dry, anomalously dry, dry, normal, wet, anomalously wet, to extremely wet	precipitation index	direct observed, measured	yes	i	snicholson@fsu.edu	Nicholson, Sharon E. "A Semi-Quantitative, Regional Precipitation Data Set for Studying African Climates of the Nineteenth Century, Part I. Overview of the Data Set." Climatic Change 50 (2001): 317-353. Nicholson, Sharon E. et al. “A Two-Century Precipitation Dataset for the Continent of Africa.” Bulletin of the American Meteorological Society 93 (2012a): 1219–31. Nicholson, Sharon E. et al. “Spa…	x	https://www.ncdc.noaa.gov/paleo-search/study/12255
158	p	precipitation	annual		1801	1900	100			Rainfall region 56	Africa	Africa	1		-15.2	33.1					0		settlers' diaries, explorers' journals, reports of scientific expeditions, historical chronicles documenting the reign of centuries of kings, oral tradition, missionary reports, and government records	not specified in paper	reports of famine, droughts, the character of the year's rainy season, agricultural failure or prosperity (conditions of crops); unusual weather, the status of vegetation and waterways; Hydrologic records (e.g. Nile, lake levels...); Rain gauge measurements	combination of documentary records, hydrologic records amd rain gauge measurements	seven-point ordinal index: -3/3= extremely dry, anomalously dry, dry, normal, wet, anomalously wet, to extremely wet	precipitation index	direct observed, measured	yes	i	snicholson@fsu.edu	Nicholson, Sharon E. "A Semi-Quantitative, Regional Precipitation Data Set for Studying African Climates of the Nineteenth Century, Part I. Overview of the Data Set." Climatic Change 50 (2001): 317-353. Nicholson, Sharon E. et al. “A Two-Century Precipitation Dataset for the Continent of Africa.” Bulletin of the American Meteorological Society 93 (2012a): 1219–31. Nicholson, Sharon E. et al. “Spa…	x	https://www.ncdc.noaa.gov/paleo-search/study/12256
159	p	precipitation	annual		1801	1900	100			Rainfall region 57	Africa	Africa	1		-16.7	27.5					0		settlers' diaries, explorers' journals, reports of scientific expeditions, historical chronicles documenting the reign of centuries of kings, oral tradition, missionary reports, and government records	not specified in paper	reports of famine, droughts, the character of the year's rainy season, agricultural failure or prosperity (conditions of crops); unusual weather, the status of vegetation and waterways; Hydrologic records (e.g. Nile, lake levels...); Rain gauge measurements	combination of documentary records, hydrologic records amd rain gauge measurements	seven-point ordinal index: -3/3= extremely dry, anomalously dry, dry, normal, wet, anomalously wet, to extremely wet	precipitation index	direct observed, measured	yes	i	snicholson@fsu.edu	Nicholson, Sharon E. "A Semi-Quantitative, Regional Precipitation Data Set for Studying African Climates of the Nineteenth Century, Part I. Overview of the Data Set." Climatic Change 50 (2001): 317-353. Nicholson, Sharon E. et al. “A Two-Century Precipitation Dataset for the Continent of Africa.” Bulletin of the American Meteorological Society 93 (2012a): 1219–31. Nicholson, Sharon E. et al. “Spa…	x	https://www.ncdc.noaa.gov/paleo-search/study/12257
160	p	precipitation	annual		1801	1900	100			Rainfall region 58	Africa	Africa	1		-18	37.7					0		settlers' diaries, explorers' journals, reports of scientific expeditions, historical chronicles documenting the reign of centuries of kings, oral tradition, missionary reports, and government records	not specified in paper	reports of famine, droughts, the character of the year's rainy season, agricultural failure or prosperity (conditions of crops); unusual weather, the status of vegetation and waterways; Hydrologic records (e.g. Nile, lake levels...); Rain gauge measurements	combination of documentary records, hydrologic records amd rain gauge measurements	seven-point ordinal index: -3/3= extremely dry, anomalously dry, dry, normal, wet, anomalously wet, to extremely wet	precipitation index	direct observed, measured	yes	i	snicholson@fsu.edu	Nicholson, Sharon E. "A Semi-Quantitative, Regional Precipitation Data Set for Studying African Climates of the Nineteenth Century, Part I. Overview of the Data Set." Climatic Change 50 (2001): 317-353. Nicholson, Sharon E. et al. “A Two-Century Precipitation Dataset for the Continent of Africa.” Bulletin of the American Meteorological Society 93 (2012a): 1219–31. Nicholson, Sharon E. et al. “Spa…	x	https://www.ncdc.noaa.gov/paleo-search/study/12258
161	p	precipitation	annual		1801	1900	100			Rainfall region 59	Africa	Africa	1		-17.9	32.3					0		settlers' diaries, explorers' journals, reports of scientific expeditions, historical chronicles documenting the reign of centuries of kings, oral tradition, missionary reports, and government records	not specified in paper	reports of famine, droughts, the character of the year's rainy season, agricultural failure or prosperity (conditions of crops); unusual weather, the status of vegetation and waterways; Hydrologic records (e.g. Nile, lake levels...); Rain gauge measurements	combination of documentary records, hydrologic records amd rain gauge measurements	seven-point ordinal index: -3/3= extremely dry, anomalously dry, dry, normal, wet, anomalously wet, to extremely wet	precipitation index	direct observed, measured	yes	i	snicholson@fsu.edu	Nicholson, Sharon E. "A Semi-Quantitative, Regional Precipitation Data Set for Studying African Climates of the Nineteenth Century, Part I. Overview of the Data Set." Climatic Change 50 (2001): 317-353. Nicholson, Sharon E. et al. “A Two-Century Precipitation Dataset for the Continent of Africa.” Bulletin of the American Meteorological Society 93 (2012a): 1219–31. Nicholson, Sharon E. et al. “Spa…	x	https://www.ncdc.noaa.gov/paleo-search/study/12259
162	p	precipitation	annual		1801	1900	100			Rainfall region 60	Africa	Africa	1		-19.5	28.6					0		settlers' diaries, explorers' journals, reports of scientific expeditions, historical chronicles documenting the reign of centuries of kings, oral tradition, missionary reports, and government records	not specified in paper	reports of famine, droughts, the character of the year's rainy season, agricultural failure or prosperity (conditions of crops); unusual weather, the status of vegetation and waterways; Hydrologic records (e.g. Nile, lake levels...); Rain gauge measurements	combination of documentary records, hydrologic records amd rain gauge measurements	seven-point ordinal index: -3/3= extremely dry, anomalously dry, dry, normal, wet, anomalously wet, to extremely wet	precipitation index	direct observed, measured	yes	i	snicholson@fsu.edu	Nicholson, Sharon E. "A Semi-Quantitative, Regional Precipitation Data Set for Studying African Climates of the Nineteenth Century, Part I. Overview of the Data Set." Climatic Change 50 (2001): 317-353. Nicholson, Sharon E. et al. “A Two-Century Precipitation Dataset for the Continent of Africa.” Bulletin of the American Meteorological Society 93 (2012a): 1219–31. Nicholson, Sharon E. et al. “Spa…	x	https://www.ncdc.noaa.gov/paleo-search/study/12260
163	p	precipitation	annual		1801	1900	100			Rainfall region 61	Africa	Africa	1		-18.9	16.4					0		settlers' diaries, explorers' journals, reports of scientific expeditions, historical chronicles documenting the reign of centuries of kings, oral tradition, missionary reports, and government records	not specified in paper	reports of famine, droughts, the character of the year's rainy season, agricultural failure or prosperity (conditions of crops); unusual weather, the status of vegetation and waterways; Hydrologic records (e.g. Nile, lake levels...); Rain gauge measurements	combination of documentary records, hydrologic records amd rain gauge measurements	seven-point ordinal index: -3/3= extremely dry, anomalously dry, dry, normal, wet, anomalously wet, to extremely wet	precipitation index	direct observed, measured	yes	i	snicholson@fsu.edu	Nicholson, Sharon E. "A Semi-Quantitative, Regional Precipitation Data Set for Studying African Climates of the Nineteenth Century, Part I. Overview of the Data Set." Climatic Change 50 (2001): 317-353. Nicholson, Sharon E. et al. “A Two-Century Precipitation Dataset for the Continent of Africa.” Bulletin of the American Meteorological Society 93 (2012a): 1219–31. Nicholson, Sharon E. et al. “Spa…	x	https://www.ncdc.noaa.gov/paleo-search/study/12261
164	p	precipitation	annual		1801	1900	100			Rainfall region 62	Africa	Africa	1		-19.2	20.9					0		settlers' diaries, explorers' journals, reports of scientific expeditions, historical chronicles documenting the reign of centuries of kings, oral tradition, missionary reports, and government records	not specified in paper	reports of famine, droughts, the character of the year's rainy season, agricultural failure or prosperity (conditions of crops); unusual weather, the status of vegetation and waterways; Hydrologic records (e.g. Nile, lake levels...); Rain gauge measurements	combination of documentary records, hydrologic records amd rain gauge measurements	seven-point ordinal index: -3/3= extremely dry, anomalously dry, dry, normal, wet, anomalously wet, to extremely wet	precipitation index	direct observed, measured	yes	i	snicholson@fsu.edu	Nicholson, Sharon E. "A Semi-Quantitative, Regional Precipitation Data Set for Studying African Climates of the Nineteenth Century, Part I. Overview of the Data Set." Climatic Change 50 (2001): 317-353. Nicholson, Sharon E. et al. “A Two-Century Precipitation Dataset for the Continent of Africa.” Bulletin of the American Meteorological Society 93 (2012a): 1219–31. Nicholson, Sharon E. et al. “Spa…	x	https://www.ncdc.noaa.gov/paleo-search/study/12262
165	p	precipitation	annual		1801	1900	100			Rainfall region 63	Africa	Africa	1		-20.6	15.6					0		settlers' diaries, explorers' journals, reports of scientific expeditions, historical chronicles documenting the reign of centuries of kings, oral tradition, missionary reports, and government records	not specified in paper	reports of famine, droughts, the character of the year's rainy season, agricultural failure or prosperity (conditions of crops); unusual weather, the status of vegetation and waterways; Hydrologic records (e.g. Nile, lake levels...); Rain gauge measurements	combination of documentary records, hydrologic records amd rain gauge measurements	seven-point ordinal index: -3/3= extremely dry, anomalously dry, dry, normal, wet, anomalously wet, to extremely wet	precipitation index	direct observed, measured	yes	i	snicholson@fsu.edu	Nicholson, Sharon E. "A Semi-Quantitative, Regional Precipitation Data Set for Studying African Climates of the Nineteenth Century, Part I. Overview of the Data Set." Climatic Change 50 (2001): 317-353. Nicholson, Sharon E. et al. “A Two-Century Precipitation Dataset for the Continent of Africa.” Bulletin of the American Meteorological Society 93 (2012a): 1219–31. Nicholson, Sharon E. et al. “Spa…	x	https://www.ncdc.noaa.gov/paleo-search/study/12263
166	p	precipitation	annual		1801	1900	100			Rainfall region 64	Africa	Africa	1		-22.1	30.7					0		settlers' diaries, explorers' journals, reports of scientific expeditions, historical chronicles documenting the reign of centuries of kings, oral tradition, missionary reports, and government records	not specified in paper	reports of famine, droughts, the character of the year's rainy season, agricultural failure or prosperity (conditions of crops); unusual weather, the status of vegetation and waterways; Hydrologic records (e.g. Nile, lake levels...); Rain gauge measurements	combination of documentary records, hydrologic records amd rain gauge measurements	seven-point ordinal index: -3/3= extremely dry, anomalously dry, dry, normal, wet, anomalously wet, to extremely wet	precipitation index	direct observed, measured	yes	i	snicholson@fsu.edu	Nicholson, Sharon E. "A Semi-Quantitative, Regional Precipitation Data Set for Studying African Climates of the Nineteenth Century, Part I. Overview of the Data Set." Climatic Change 50 (2001): 317-353. Nicholson, Sharon E. et al. “A Two-Century Precipitation Dataset for the Continent of Africa.” Bulletin of the American Meteorological Society 93 (2012a): 1219–31. Nicholson, Sharon E. et al. “Spa…	x	https://www.ncdc.noaa.gov/paleo-search/study/12264
167	p	precipitation	annual		1801	1900	100			Rainfall region 65	Africa	Africa	1		-22	17.7					0		settlers' diaries, explorers' journals, reports of scientific expeditions, historical chronicles documenting the reign of centuries of kings, oral tradition, missionary reports, and government records	not specified in paper	reports of famine, droughts, the character of the year's rainy season, agricultural failure or prosperity (conditions of crops); unusual weather, the status of vegetation and waterways; Hydrologic records (e.g. Nile, lake levels...); Rain gauge measurements	combination of documentary records, hydrologic records amd rain gauge measurements	seven-point ordinal index: -3/3= extremely dry, anomalously dry, dry, normal, wet, anomalously wet, to extremely wet	precipitation index	direct observed, measured	yes	i	snicholson@fsu.edu	Nicholson, Sharon E. "A Semi-Quantitative, Regional Precipitation Data Set for Studying African Climates of the Nineteenth Century, Part I. Overview of the Data Set." Climatic Change 50 (2001): 317-353. Nicholson, Sharon E. et al. “A Two-Century Precipitation Dataset for the Continent of Africa.” Bulletin of the American Meteorological Society 93 (2012a): 1219–31. Nicholson, Sharon E. et al. “Spa…	x	https://www.ncdc.noaa.gov/paleo-search/study/12265
168	p	precipitation	annual		1801	1900	100			Rainfall region 66	Africa	Africa	1		-20.3	33.7					0		settlers' diaries, explorers' journals, reports of scientific expeditions, historical chronicles documenting the reign of centuries of kings, oral tradition, missionary reports, and government records	not specified in paper	reports of famine, droughts, the character of the year's rainy season, agricultural failure or prosperity (conditions of crops); unusual weather, the status of vegetation and waterways; Hydrologic records (e.g. Nile, lake levels...); Rain gauge measurements	combination of documentary records, hydrologic records amd rain gauge measurements	seven-point ordinal index: -3/3= extremely dry, anomalously dry, dry, normal, wet, anomalously wet, to extremely wet	precipitation index	direct observed, measured	yes	i	snicholson@fsu.edu	Nicholson, Sharon E. "A Semi-Quantitative, Regional Precipitation Data Set for Studying African Climates of the Nineteenth Century, Part I. Overview of the Data Set." Climatic Change 50 (2001): 317-353. Nicholson, Sharon E. et al. “A Two-Century Precipitation Dataset for the Continent of Africa.” Bulletin of the American Meteorological Society 93 (2012a): 1219–31. Nicholson, Sharon E. et al. “Spa…	x	https://www.ncdc.noaa.gov/paleo-search/study/12266
169	p	precipitation	annual		1801	1900	100			Rainfall region 67	Africa	Africa	1		-23	33.6					0		settlers' diaries, explorers' journals, reports of scientific expeditions, historical chronicles documenting the reign of centuries of kings, oral tradition, missionary reports, and government records	not specified in paper	reports of famine, droughts, the character of the year's rainy season, agricultural failure or prosperity (conditions of crops); unusual weather, the status of vegetation and waterways; Hydrologic records (e.g. Nile, lake levels...); Rain gauge measurements	combination of documentary records, hydrologic records amd rain gauge measurements	seven-point ordinal index: -3/3= extremely dry, anomalously dry, dry, normal, wet, anomalously wet, to extremely wet	precipitation index	direct observed, measured	yes	i	snicholson@fsu.edu	Nicholson, Sharon E. "A Semi-Quantitative, Regional Precipitation Data Set for Studying African Climates of the Nineteenth Century, Part I. Overview of the Data Set." Climatic Change 50 (2001): 317-353. Nicholson, Sharon E. et al. “A Two-Century Precipitation Dataset for the Continent of Africa.” Bulletin of the American Meteorological Society 93 (2012a): 1219–31. Nicholson, Sharon E. et al. “Spa…	x	https://www.ncdc.noaa.gov/paleo-search/study/12267
170	p	precipitation	annual		1801	1900	100			Rainfall region 68	Africa	Africa	1		-23	27.3					0		settlers' diaries, explorers' journals, reports of scientific expeditions, historical chronicles documenting the reign of centuries of kings, oral tradition, missionary reports, and government records	not specified in paper	reports of famine, droughts, the character of the year's rainy season, agricultural failure or prosperity (conditions of crops); unusual weather, the status of vegetation and waterways; Hydrologic records (e.g. Nile, lake levels...); Rain gauge measurements	combination of documentary records, hydrologic records amd rain gauge measurements	seven-point ordinal index: -3/3= extremely dry, anomalously dry, dry, normal, wet, anomalously wet, to extremely wet	precipitation index	direct observed, measured	yes	i	snicholson@fsu.edu	Nicholson, Sharon E. "A Semi-Quantitative, Regional Precipitation Data Set for Studying African Climates of the Nineteenth Century, Part I. Overview of the Data Set." Climatic Change 50 (2001): 317-353. Nicholson, Sharon E. et al. “A Two-Century Precipitation Dataset for the Continent of Africa.” Bulletin of the American Meteorological Society 93 (2012a): 1219–31. Nicholson, Sharon E. et al. “Spa…	x	https://www.ncdc.noaa.gov/paleo-search/study/12268
171	p	precipitation	annual		1801	1900	100			Rainfall region 69	Africa	Africa	1		-24.2	17.4					0		settlers' diaries, explorers' journals, reports of scientific expeditions, historical chronicles documenting the reign of centuries of kings, oral tradition, missionary reports, and government records	not specified in paper	reports of famine, droughts, the character of the year's rainy season, agricultural failure or prosperity (conditions of crops); unusual weather, the status of vegetation and waterways; Hydrologic records (e.g. Nile, lake levels...); Rain gauge measurements	combination of documentary records, hydrologic records amd rain gauge measurements	seven-point ordinal index: -3/3= extremely dry, anomalously dry, dry, normal, wet, anomalously wet, to extremely wet	precipitation index	direct observed, measured	yes	i	snicholson@fsu.edu	Nicholson, Sharon E. "A Semi-Quantitative, Regional Precipitation Data Set for Studying African Climates of the Nineteenth Century, Part I. Overview of the Data Set." Climatic Change 50 (2001): 317-353. Nicholson, Sharon E. et al. “A Two-Century Precipitation Dataset for the Continent of Africa.” Bulletin of the American Meteorological Society 93 (2012a): 1219–31. Nicholson, Sharon E. et al. “Spa…	x	https://www.ncdc.noaa.gov/paleo-search/study/12269
172	p	precipitation	annual		1801	1900	100			Rainfall region 70	Africa	Africa	1		-26.4	17					0		settlers' diaries, explorers' journals, reports of scientific expeditions, historical chronicles documenting the reign of centuries of kings, oral tradition, missionary reports, and government records	not specified in paper	reports of famine, droughts, the character of the year's rainy season, agricultural failure or prosperity (conditions of crops); unusual weather, the status of vegetation and waterways; Hydrologic records (e.g. Nile, lake levels...); Rain gauge measurements	combination of documentary records, hydrologic records amd rain gauge measurements	seven-point ordinal index: -3/3= extremely dry, anomalously dry, dry, normal, wet, anomalously wet, to extremely wet	precipitation index	direct observed, measured	yes	i	snicholson@fsu.edu	Nicholson, Sharon E. "A Semi-Quantitative, Regional Precipitation Data Set for Studying African Climates of the Nineteenth Century, Part I. Overview of the Data Set." Climatic Change 50 (2001): 317-353. Nicholson, Sharon E. et al. “A Two-Century Precipitation Dataset for the Continent of Africa.” Bulletin of the American Meteorological Society 93 (2012a): 1219–31. Nicholson, Sharon E. et al. “Spa…	x	https://www.ncdc.noaa.gov/paleo-search/study/12270
173	p	precipitation	annual		1801	1900	100			Rainfall region 71	Africa	Africa	1		-19.6	13.5					0		settlers' diaries, explorers' journals, reports of scientific expeditions, historical chronicles documenting the reign of centuries of kings, oral tradition, missionary reports, and government records	not specified in paper	reports of famine, droughts, the character of the year's rainy season, agricultural failure or prosperity (conditions of crops); unusual weather, the status of vegetation and waterways; Hydrologic records (e.g. Nile, lake levels...); Rain gauge measurements	combination of documentary records, hydrologic records amd rain gauge measurements	seven-point ordinal index: -3/3= extremely dry, anomalously dry, dry, normal, wet, anomalously wet, to extremely wet	precipitation index	direct observed, measured	yes	i	snicholson@fsu.edu	Nicholson, Sharon E. "A Semi-Quantitative, Regional Precipitation Data Set for Studying African Climates of the Nineteenth Century, Part I. Overview of the Data Set." Climatic Change 50 (2001): 317-353. Nicholson, Sharon E. et al. “A Two-Century Precipitation Dataset for the Continent of Africa.” Bulletin of the American Meteorological Society 93 (2012a): 1219–31. Nicholson, Sharon E. et al. “Spa…	x	https://www.ncdc.noaa.gov/paleo-search/study/12271
174	p	precipitation	annual		1801	1900	100			Rainfall region 72	Africa	Africa	1		-26.4	31.8					0		settlers' diaries, explorers' journals, reports of scientific expeditions, historical chronicles documenting the reign of centuries of kings, oral tradition, missionary reports, and government records	not specified in paper	reports of famine, droughts, the character of the year's rainy season, agricultural failure or prosperity (conditions of crops); unusual weather, the status of vegetation and waterways; Hydrologic records (e.g. Nile, lake levels...); Rain gauge measurements	combination of documentary records, hydrologic records amd rain gauge measurements	seven-point ordinal index: -3/3= extremely dry, anomalously dry, dry, normal, wet, anomalously wet, to extremely wet	precipitation index	direct observed, measured	yes	i	snicholson@fsu.edu	Nicholson, Sharon E. "A Semi-Quantitative, Regional Precipitation Data Set for Studying African Climates of the Nineteenth Century, Part I. Overview of the Data Set." Climatic Change 50 (2001): 317-353. Nicholson, Sharon E. et al. “A Two-Century Precipitation Dataset for the Continent of Africa.” Bulletin of the American Meteorological Society 93 (2012a): 1219–31. Nicholson, Sharon E. et al. “Spa…	x	https://www.ncdc.noaa.gov/paleo-search/study/12272
175	p	precipitation	annual		1801	1900	100			Rainfall region 73	Africa	Africa	1		-27.9	29.9					0		settlers' diaries, explorers' journals, reports of scientific expeditions, historical chronicles documenting the reign of centuries of kings, oral tradition, missionary reports, and government records	not specified in paper	reports of famine, droughts, the character of the year's rainy season, agricultural failure or prosperity (conditions of crops); unusual weather, the status of vegetation and waterways; Hydrologic records (e.g. Nile, lake levels...); Rain gauge measurements	combination of documentary records, hydrologic records amd rain gauge measurements	seven-point ordinal index: -3/3= extremely dry, anomalously dry, dry, normal, wet, anomalously wet, to extremely wet	precipitation index	direct observed, measured	yes	i	snicholson@fsu.edu	Nicholson, Sharon E. "A Semi-Quantitative, Regional Precipitation Data Set for Studying African Climates of the Nineteenth Century, Part I. Overview of the Data Set." Climatic Change 50 (2001): 317-353. Nicholson, Sharon E. et al. “A Two-Century Precipitation Dataset for the Continent of Africa.” Bulletin of the American Meteorological Society 93 (2012a): 1219–31. Nicholson, Sharon E. et al. “Spa…	x	https://www.ncdc.noaa.gov/paleo-search/study/12273
176	p	precipitation	annual		1801	1900	100			Rainfall region 74	Africa	Africa	1		-26.4	27					0		settlers' diaries, explorers' journals, reports of scientific expeditions, historical chronicles documenting the reign of centuries of kings, oral tradition, missionary reports, and government records	not specified in paper	reports of famine, droughts, the character of the year's rainy season, agricultural failure or prosperity (conditions of crops); unusual weather, the status of vegetation and waterways; Hydrologic records (e.g. Nile, lake levels...); Rain gauge measurements	combination of documentary records, hydrologic records amd rain gauge measurements	seven-point ordinal index: -3/3= extremely dry, anomalously dry, dry, normal, wet, anomalously wet, to extremely wet	precipitation index	direct observed, measured	yes	i	snicholson@fsu.edu	Nicholson, Sharon E. "A Semi-Quantitative, Regional Precipitation Data Set for Studying African Climates of the Nineteenth Century, Part I. Overview of the Data Set." Climatic Change 50 (2001): 317-353. Nicholson, Sharon E. et al. “A Two-Century Precipitation Dataset for the Continent of Africa.” Bulletin of the American Meteorological Society 93 (2012a): 1219–31. Nicholson, Sharon E. et al. “Spa…	x	https://www.ncdc.noaa.gov/paleo-search/study/12274
177	p	precipitation	annual		1801	1900	100			Rainfall region 75	Africa	Africa	1		-29.7	28.4					0		settlers' diaries, explorers' journals, reports of scientific expeditions, historical chronicles documenting the reign of centuries of kings, oral tradition, missionary reports, and government records	not specified in paper	reports of famine, droughts, the character of the year's rainy season, agricultural failure or prosperity (conditions of crops); unusual weather, the status of vegetation and waterways; Hydrologic records (e.g. Nile, lake levels...); Rain gauge measurements	combination of documentary records, hydrologic records amd rain gauge measurements	seven-point ordinal index: -3/3= extremely dry, anomalously dry, dry, normal, wet, anomalously wet, to extremely wet	precipitation index	direct observed, measured	yes	i	snicholson@fsu.edu	Nicholson, Sharon E. "A Semi-Quantitative, Regional Precipitation Data Set for Studying African Climates of the Nineteenth Century, Part I. Overview of the Data Set." Climatic Change 50 (2001): 317-353. Nicholson, Sharon E. et al. “A Two-Century Precipitation Dataset for the Continent of Africa.” Bulletin of the American Meteorological Society 93 (2012a): 1219–31. Nicholson, Sharon E. et al. “Spa…	x	https://www.ncdc.noaa.gov/paleo-search/study/12275
178	p	precipitation	annual		1801	1900	100			Rainfall region 76	Africa	Africa	1		-29.1	25.6					0		settlers' diaries, explorers' journals, reports of scientific expeditions, historical chronicles documenting the reign of centuries of kings, oral tradition, missionary reports, and government records	not specified in paper	reports of famine, droughts, the character of the year's rainy season, agricultural failure or prosperity (conditions of crops); unusual weather, the status of vegetation and waterways; Hydrologic records (e.g. Nile, lake levels...); Rain gauge measurements	combination of documentary records, hydrologic records amd rain gauge measurements	seven-point ordinal index: -3/3= extremely dry, anomalously dry, dry, normal, wet, anomalously wet, to extremely wet	precipitation index	direct observed, measured	yes	i	snicholson@fsu.edu	Nicholson, Sharon E. "A Semi-Quantitative, Regional Precipitation Data Set for Studying African Climates of the Nineteenth Century, Part I. Overview of the Data Set." Climatic Change 50 (2001): 317-353. Nicholson, Sharon E. et al. “A Two-Century Precipitation Dataset for the Continent of Africa.” Bulletin of the American Meteorological Society 93 (2012a): 1219–31. Nicholson, Sharon E. et al. “Spa…	x	https://www.ncdc.noaa.gov/paleo-search/study/12276
179	p	precipitation	annual		1801	1900	100			Rainfall region 77	Africa	Africa	1		-26.1	23					0		settlers' diaries, explorers' journals, reports of scientific expeditions, historical chronicles documenting the reign of centuries of kings, oral tradition, missionary reports, and government records	not specified in paper	reports of famine, droughts, the character of the year's rainy season, agricultural failure or prosperity (conditions of crops); unusual weather, the status of vegetation and waterways; Hydrologic records (e.g. Nile, lake levels...); Rain gauge measurements	combination of documentary records, hydrologic records amd rain gauge measurements	seven-point ordinal index: -3/3= extremely dry, anomalously dry, dry, normal, wet, anomalously wet, to extremely wet	precipitation index	direct observed, measured	yes	i	snicholson@fsu.edu	Nicholson, Sharon E. "A Semi-Quantitative, Regional Precipitation Data Set for Studying African Climates of the Nineteenth Century, Part I. Overview of the Data Set." Climatic Change 50 (2001): 317-353. Nicholson, Sharon E. et al. “A Two-Century Precipitation Dataset for the Continent of Africa.” Bulletin of the American Meteorological Society 93 (2012a): 1219–31. Nicholson, Sharon E. et al. “Spa…	x	https://www.ncdc.noaa.gov/paleo-search/study/12277
180	p	precipitation	annual		1801	1900	100			Rainfall region 78	Africa	Africa	1		-27.8	20.3					0		settlers' diaries, explorers' journals, reports of scientific expeditions, historical chronicles documenting the reign of centuries of kings, oral tradition, missionary reports, and government records	not specified in paper	reports of famine, droughts, the character of the year's rainy season, agricultural failure or prosperity (conditions of crops); unusual weather, the status of vegetation and waterways; Hydrologic records (e.g. Nile, lake levels...); Rain gauge measurements	combination of documentary records, hydrologic records amd rain gauge measurements	seven-point ordinal index: -3/3= extremely dry, anomalously dry, dry, normal, wet, anomalously wet, to extremely wet	precipitation index	direct observed, measured	yes	i	snicholson@fsu.edu	Nicholson, Sharon E. "A Semi-Quantitative, Regional Precipitation Data Set for Studying African Climates of the Nineteenth Century, Part I. Overview of the Data Set." Climatic Change 50 (2001): 317-353. Nicholson, Sharon E. et al. “A Two-Century Precipitation Dataset for the Continent of Africa.” Bulletin of the American Meteorological Society 93 (2012a): 1219–31. Nicholson, Sharon E. et al. “Spa…	x	https://www.ncdc.noaa.gov/paleo-search/study/12278
181	p	precipitation	annual		1801	1900	100			Rainfall region 79	Africa	Africa	1		-32.2	28.6					0		settlers' diaries, explorers' journals, reports of scientific expeditions, historical chronicles documenting the reign of centuries of kings, oral tradition, missionary reports, and government records	not specified in paper	reports of famine, droughts, the character of the year's rainy season, agricultural failure or prosperity (conditions of crops); unusual weather, the status of vegetation and waterways; Hydrologic records (e.g. Nile, lake levels...); Rain gauge measurements	combination of documentary records, hydrologic records amd rain gauge measurements	seven-point ordinal index: -3/3= extremely dry, anomalously dry, dry, normal, wet, anomalously wet, to extremely wet	precipitation index	direct observed, measured	yes	i	snicholson@fsu.edu	Nicholson, Sharon E. "A Semi-Quantitative, Regional Precipitation Data Set for Studying African Climates of the Nineteenth Century, Part I. Overview of the Data Set." Climatic Change 50 (2001): 317-353. Nicholson, Sharon E. et al. “A Two-Century Precipitation Dataset for the Continent of Africa.” Bulletin of the American Meteorological Society 93 (2012a): 1219–31. Nicholson, Sharon E. et al. “Spa…	x	https://www.ncdc.noaa.gov/paleo-search/study/12279
182	p	precipitation	annual		1801	1900	100			Rainfall region 80	Africa	Africa	1		-32.2	24.4					0		settlers' diaries, explorers' journals, reports of scientific expeditions, historical chronicles documenting the reign of centuries of kings, oral tradition, missionary reports, and government records	not specified in paper	reports of famine, droughts, the character of the year's rainy season, agricultural failure or prosperity (conditions of crops); unusual weather, the status of vegetation and waterways; Hydrologic records (e.g. Nile, lake levels...); Rain gauge measurements	combination of documentary records, hydrologic records amd rain gauge measurements	seven-point ordinal index: -3/3= extremely dry, anomalously dry, dry, normal, wet, anomalously wet, to extremely wet	precipitation index	direct observed, measured	yes	i	snicholson@fsu.edu	Nicholson, Sharon E. "A Semi-Quantitative, Regional Precipitation Data Set for Studying African Climates of the Nineteenth Century, Part I. Overview of the Data Set." Climatic Change 50 (2001): 317-353. Nicholson, Sharon E. et al. “A Two-Century Precipitation Dataset for the Continent of Africa.” Bulletin of the American Meteorological Society 93 (2012a): 1219–31. Nicholson, Sharon E. et al. “Spa…	x	https://www.ncdc.noaa.gov/paleo-search/study/12280
183	p	precipitation	annual		1801	1900	100			Rainfall region 81	Africa	Africa	1		-31.1	21					0		settlers' diaries, explorers' journals, reports of scientific expeditions, historical chronicles documenting the reign of centuries of kings, oral tradition, missionary reports, and government records	not specified in paper	reports of famine, droughts, the character of the year's rainy season, agricultural failure or prosperity (conditions of crops); unusual weather, the status of vegetation and waterways; Hydrologic records (e.g. Nile, lake levels...); Rain gauge measurements	combination of documentary records, hydrologic records amd rain gauge measurements	seven-point ordinal index: -3/3= extremely dry, anomalously dry, dry, normal, wet, anomalously wet, to extremely wet	precipitation index	direct observed, measured	yes	i	snicholson@fsu.edu	Nicholson, Sharon E. "A Semi-Quantitative, Regional Precipitation Data Set for Studying African Climates of the Nineteenth Century, Part I. Overview of the Data Set." Climatic Change 50 (2001): 317-353. Nicholson, Sharon E. et al. “A Two-Century Precipitation Dataset for the Continent of Africa.” Bulletin of the American Meteorological Society 93 (2012a): 1219–31. Nicholson, Sharon E. et al. “Spa…	x	https://www.ncdc.noaa.gov/paleo-search/study/12281
184	p	precipitation	annual		1801	1900	100			Rainfall region 82	Africa	Africa	1		-30	18					0		settlers' diaries, explorers' journals, reports of scientific expeditions, historical chronicles documenting the reign of centuries of kings, oral tradition, missionary reports, and government records	not specified in paper	reports of famine, droughts, the character of the year's rainy season, agricultural failure or prosperity (conditions of crops); unusual weather, the status of vegetation and waterways; Hydrologic records (e.g. Nile, lake levels...); Rain gauge measurements	combination of documentary records, hydrologic records amd rain gauge measurements	seven-point ordinal index: -3/3= extremely dry, anomalously dry, dry, normal, wet, anomalously wet, to extremely wet	precipitation index	direct observed, measured	yes	i	snicholson@fsu.edu	Nicholson, Sharon E. "A Semi-Quantitative, Regional Precipitation Data Set for Studying African Climates of the Nineteenth Century, Part I. Overview of the Data Set." Climatic Change 50 (2001): 317-353. Nicholson, Sharon E. et al. “A Two-Century Precipitation Dataset for the Continent of Africa.” Bulletin of the American Meteorological Society 93 (2012a): 1219–31. Nicholson, Sharon E. et al. “Spa…	x	https://www.ncdc.noaa.gov/paleo-search/study/12282
185	p	precipitation	annual		1801	1900	100			Rainfall region 83	Africa	Africa	1		-34.2	22.7					0		settlers' diaries, explorers' journals, reports of scientific expeditions, historical chronicles documenting the reign of centuries of kings, oral tradition, missionary reports, and government records	not specified in paper	reports of famine, droughts, the character of the year's rainy season, agricultural failure or prosperity (conditions of crops); unusual weather, the status of vegetation and waterways; Hydrologic records (e.g. Nile, lake levels...); Rain gauge measurements	combination of documentary records, hydrologic records amd rain gauge measurements	seven-point ordinal index: -3/3= extremely dry, anomalously dry, dry, normal, wet, anomalously wet, to extremely wet	precipitation index	direct observed, measured	yes	i	snicholson@fsu.edu	Nicholson, Sharon E. "A Semi-Quantitative, Regional Precipitation Data Set for Studying African Climates of the Nineteenth Century, Part I. Overview of the Data Set." Climatic Change 50 (2001): 317-353. Nicholson, Sharon E. et al. “A Two-Century Precipitation Dataset for the Continent of Africa.” Bulletin of the American Meteorological Society 93 (2012a): 1219–31. Nicholson, Sharon E. et al. “Spa…	x	https://www.ncdc.noaa.gov/paleo-search/study/12283
186	p	precipitation	annual		1801	1900	100			Rainfall region 84	Africa	Africa	1		-33.6	19.2					0		settlers' diaries, explorers' journals, reports of scientific expeditions, historical chronicles documenting the reign of centuries of kings, oral tradition, missionary reports, and government records	not specified in paper	reports of famine, droughts, the character of the year's rainy season, agricultural failure or prosperity (conditions of crops); unusual weather, the status of vegetation and waterways; Hydrologic records (e.g. Nile, lake levels...); Rain gauge measurements	combination of documentary records, hydrologic records amd rain gauge measurements	seven-point ordinal index: -3/3= extremely dry, anomalously dry, dry, normal, wet, anomalously wet, to extremely wet	precipitation index	direct observed, measured	yes	i	snicholson@fsu.edu	Nicholson, Sharon E. "A Semi-Quantitative, Regional Precipitation Data Set for Studying African Climates of the Nineteenth Century, Part I. Overview of the Data Set." Climatic Change 50 (2001): 317-353. Nicholson, Sharon E. et al. “A Two-Century Precipitation Dataset for the Continent of Africa.” Bulletin of the American Meteorological Society 93 (2012a): 1219–31. Nicholson, Sharon E. et al. “Spa…	x	https://www.ncdc.noaa.gov/paleo-search/study/12284
187	p	precipitation	annual		1801	1900	100			Rainfall region 85	Africa	Africa	1		6.8	28.9					0		settlers' diaries, explorers' journals, reports of scientific expeditions, historical chronicles documenting the reign of centuries of kings, oral tradition, missionary reports, and government records	not specified in paper	reports of famine, droughts, the character of the year's rainy season, agricultural failure or prosperity (conditions of crops); unusual weather, the status of vegetation and waterways; Hydrologic records (e.g. Nile, lake levels...); Rain gauge measurements	combination of documentary records, hydrologic records amd rain gauge measurements	seven-point ordinal index: -3/3= extremely dry, anomalously dry, dry, normal, wet, anomalously wet, to extremely wet	precipitation index	direct observed, measured	yes	i	snicholson@fsu.edu	Nicholson, Sharon E. "A Semi-Quantitative, Regional Precipitation Data Set for Studying African Climates of the Nineteenth Century, Part I. Overview of the Data Set." Climatic Change 50 (2001): 317-353. Nicholson, Sharon E. et al. “A Two-Century Precipitation Dataset for the Continent of Africa.” Bulletin of the American Meteorological Society 93 (2012a): 1219–31. Nicholson, Sharon E. et al. “Spa…	x	https://www.ncdc.noaa.gov/paleo-search/study/12285
188	p	precipitation	annual		1801	1900	100			Rainfall region 86	Africa	Africa	1		2.3	11.5					0		settlers' diaries, explorers' journals, reports of scientific expeditions, historical chronicles documenting the reign of centuries of kings, oral tradition, missionary reports, and government records	not specified in paper	reports of famine, droughts, the character of the year's rainy season, agricultural failure or prosperity (conditions of crops); unusual weather, the status of vegetation and waterways; Hydrologic records (e.g. Nile, lake levels...); Rain gauge measurements	combination of documentary records, hydrologic records amd rain gauge measurements	seven-point ordinal index: -3/3= extremely dry, anomalously dry, dry, normal, wet, anomalously wet, to extremely wet	precipitation index	direct observed, measured	yes	i	snicholson@fsu.edu	Nicholson, Sharon E. "A Semi-Quantitative, Regional Precipitation Data Set for Studying African Climates of the Nineteenth Century, Part I. Overview of the Data Set." Climatic Change 50 (2001): 317-353. Nicholson, Sharon E. et al. “A Two-Century Precipitation Dataset for the Continent of Africa.” Bulletin of the American Meteorological Society 93 (2012a): 1219–31. Nicholson, Sharon E. et al. “Spa…	x	https://www.ncdc.noaa.gov/paleo-search/study/12286
189	p	precipitation	annual		1801	1900	100			Rainfall region 87	Africa	Africa	1		-2.6	37.6					0		settlers' diaries, explorers' journals, reports of scientific expeditions, historical chronicles documenting the reign of centuries of kings, oral tradition, missionary reports, and government records	not specified in paper	reports of famine, droughts, the character of the year's rainy season, agricultural failure or prosperity (conditions of crops); unusual weather, the status of vegetation and waterways; Hydrologic records (e.g. Nile, lake levels...); Rain gauge measurements	combination of documentary records, hydrologic records amd rain gauge measurements	seven-point ordinal index: -3/3= extremely dry, anomalously dry, dry, normal, wet, anomalously wet, to extremely wet	precipitation index	direct observed, measured	yes	i	snicholson@fsu.edu	Nicholson, Sharon E. "A Semi-Quantitative, Regional Precipitation Data Set for Studying African Climates of the Nineteenth Century, Part I. Overview of the Data Set." Climatic Change 50 (2001): 317-353. Nicholson, Sharon E. et al. “A Two-Century Precipitation Dataset for the Continent of Africa.” Bulletin of the American Meteorological Society 93 (2012a): 1219–31. Nicholson, Sharon E. et al. “Spa…	x	https://www.ncdc.noaa.gov/paleo-search/study/12287
190	p	precipitation	annual		1801	1900	100			Rainfall region 88	Africa	Africa	1		9.5	41.4					0		settlers' diaries, explorers' journals, reports of scientific expeditions, historical chronicles documenting the reign of centuries of kings, oral tradition, missionary reports, and government records	not specified in paper	reports of famine, droughts, the character of the year's rainy season, agricultural failure or prosperity (conditions of crops); unusual weather, the status of vegetation and waterways; Hydrologic records (e.g. Nile, lake levels...); Rain gauge measurements	combination of documentary records, hydrologic records amd rain gauge measurements	seven-point ordinal index: -3/3= extremely dry, anomalously dry, dry, normal, wet, anomalously wet, to extremely wet	precipitation index	direct observed, measured	yes	i	snicholson@fsu.edu	Nicholson, Sharon E. "A Semi-Quantitative, Regional Precipitation Data Set for Studying African Climates of the Nineteenth Century, Part I. Overview of the Data Set." Climatic Change 50 (2001): 317-353. Nicholson, Sharon E. et al. “A Two-Century Precipitation Dataset for the Continent of Africa.” Bulletin of the American Meteorological Society 93 (2012a): 1219–31. Nicholson, Sharon E. et al. “Spa…	x	https://www.ncdc.noaa.gov/paleo-search/study/12288
191	p	precipitation	annual		1801	1900	100			Rainfall region 89	Africa	Africa	1		5.5	46.4					0		settlers' diaries, explorers' journals, reports of scientific expeditions, historical chronicles documenting the reign of centuries of kings, oral tradition, missionary reports, and government records	not specified in paper	reports of famine, droughts, the character of the year's rainy season, agricultural failure or prosperity (conditions of crops); unusual weather, the status of vegetation and waterways; Hydrologic records (e.g. Nile, lake levels...); Rain gauge measurements	combination of documentary records, hydrologic records amd rain gauge measurements	seven-point ordinal index: -3/3= extremely dry, anomalously dry, dry, normal, wet, anomalously wet, to extremely wet	precipitation index	direct observed, measured	yes	i	snicholson@fsu.edu	Nicholson, Sharon E. "A Semi-Quantitative, Regional Precipitation Data Set for Studying African Climates of the Nineteenth Century, Part I. Overview of the Data Set." Climatic Change 50 (2001): 317-353. Nicholson, Sharon E. et al. “A Two-Century Precipitation Dataset for the Continent of Africa.” Bulletin of the American Meteorological Society 93 (2012a): 1219–31. Nicholson, Sharon E. et al. “Spa…	x	https://www.ncdc.noaa.gov/paleo-search/study/12289
192	p	precipitation	annual		1801	1900	100			Rainfall region 90	Africa	Africa	1		0.6	20.4					0		settlers' diaries, explorers' journals, reports of scientific expeditions, historical chronicles documenting the reign of centuries of kings, oral tradition, missionary reports, and government records	not specified in paper	reports of famine, droughts, the character of the year's rainy season, agricultural failure or prosperity (conditions of crops); unusual weather, the status of vegetation and waterways; Hydrologic records (e.g. Nile, lake levels...); Rain gauge measurements	combination of documentary records, hydrologic records amd rain gauge measurements	seven-point ordinal index: -3/3= extremely dry, anomalously dry, dry, normal, wet, anomalously wet, to extremely wet	precipitation index	direct observed, measured	yes	i	snicholson@fsu.edu	Nicholson, Sharon E. "A Semi-Quantitative, Regional Precipitation Data Set for Studying African Climates of the Nineteenth Century, Part I. Overview of the Data Set." Climatic Change 50 (2001): 317-353. Nicholson, Sharon E. et al. “A Two-Century Precipitation Dataset for the Continent of Africa.” Bulletin of the American Meteorological Society 93 (2012a): 1219–31. Nicholson, Sharon E. et al. “Spa…	x	https://www.ncdc.noaa.gov/paleo-search/study/12290
193	w	wind	annual	June	1750	2013	264			North west Africa	North west Africa	Africa	1				13	7	-29	-17	0		International Comprehensive Ocean–Atmosphere Data Set (ICOADS) v2.5; English East India Company logbooks collection (1789-1834)	British Library	wind direction observations	southwesterly wind frequency in June	ASWI (African Southwesterly Index) characterizes the strength of the West African Monsoon; is computed as proportion of days per month (in %) inside the 29ºW-17ºW, 7ºN-13ºN limits with prevailing wind blowing from the southwest quadrant (between 180º and 270º from the true north).	African Southwesterly Index	direct observed, measured	no	i	dgalpuy@upo.es	Gallego, David et al. "An instrumental index of the West African Monsoon back to the nineteenth century." Quarterly Journal of the Royal Meteorological Society 141 (2015): 3166–3176.	x	https://www.upo.es/vareclim/Data/ASWI.txt
194	w	wind	annual	July	1750	2013	264			North west Africa	North west Africa	Africa	1				13	7	-29	-17	0		International Comprehensive Ocean–Atmosphere Data Set (ICOADS) v2.5; English East India Company logbooks collection (1789-1834)	British Library	wind direction observations	southwesterly wind frequency in July	ASWI (African Southwesterly Index) characterizes the strength of the West African Monsoon; is computed as proportion of days per month (in %) inside the 29ºW-17ºW, 7ºN-13ºN limits with prevailing wind blowing from the southwest quadrant (between 180º and 270º from the true north).	African Southwesterly Index	direct observed, measured	no	i	dgalpuy@upo.es	Gallego, David et al. "An instrumental index of the West African Monsoon back to the nineteenth century." Quarterly Journal of the Royal Meteorological Society 141 (2015): 3166–3176.	x	https://www.upo.es/vareclim/Data/ASWI.txt
195	w	wind	annual	August	1750	2013	264			North west Africa	North west Africa	Africa	1				13	7	-29	-17	0		International Comprehensive Ocean–Atmosphere Data Set (ICOADS) v2.5; English East India Company logbooks collection (1789-1834)	British Library	wind direction observations	southwesterly wind frequency in August	ASWI (African Southwesterly Index) characterizes the strength of the West African Monsoon; is computed as proportion of days per month (in %) inside the 29ºW-17ºW, 7ºN-13ºN limits with prevailing wind blowing from the southwest quadrant (between 180º and 270º from the true north).	African Southwesterly Index	direct observed, measured	no	i	dgalpuy@upo.es	Gallego, David et al. "An instrumental index of the West African Monsoon back to the nineteenth century." Quarterly Journal of the Royal Meteorological Society 141 (2015): 3166–3176.	x	https://www.upo.es/vareclim/Data/ASWI.txt
196	w	wind	annual	September	1750	2013	264			North west Africa	North west Africa	Africa	1				13	7	-29	-17	0		International Comprehensive Ocean–Atmosphere Data Set (ICOADS) v2.5; English East India Company logbooks collection (1789-1834)	British Library	wind direction observations	southwesterly wind frequency in September	ASWI (African Southwesterly Index) characterizes the strength of the West African Monsoon; is computed as proportion of days per month (in %) inside the 29ºW-17ºW, 7ºN-13ºN limits with prevailing wind blowing from the southwest quadrant (between 180º and 270º from the true north).	African Southwesterly Index	direct observed, measured	no	i	dgalpuy@upo.es	Gallego, David et al. "An instrumental index of the West African Monsoon back to the nineteenth century." Quarterly Journal of the Royal Meteorological Society 141 (2015): 3166–3176.	x	https://www.upo.es/vareclim/Data/ASWI.txt
197	p	precipitation	annual		622	1922	1301			Kairo	Egypt	Africa	1		30.01	31.23					1	Al-Roda Nilometer on Roda Island (Cairo)	Flood and low water marks		Nile level measurements from nilometer	water level height of nile river	there is a number of caveats with this series as e.g. changing measuring systems through time, change of the zero point of measurement, location of the nilometer. See Popper 1951 for a thorough review.	river discharge series	direct observed/mearued	yes	ts		Popper, W. The Cairo Nilometer; Studies in Ibn Taghrī Birdī’s Chronicles of Egypt: I. (University of California Press, 1951); Toussoun, O. Mémoire sur l'Histoire du Nil. (Cairo, 1925)	*	https://archive.org/details/MIE_9/mode/2up
198	p	precipitation	annual		1550	1830	281			Mozambique	Africa	Africa	1				-27	-10	28	42	2	based on graph in paper	Portuguese colonial and missionary materials, Dutch dagregisters, and British naval sources	primarily the Arquivo Histórico Ultramarino, Lisbon and the Nationaal Archief, The Hague	reports of droughts, famines, and observations of climate and climate-related phenomena	references to drought/famine and rainfall/floods	time series of precipitation variability based on presence of wet or dry rainy seasons	dryness-wetness index	direct observed	yes	ts	MHannaford@lincoln.ac.uk	Hannaford, M. J. & Beck, K. K. Rainfall variability in southeast and west-central Africa during the Little Ice Age: do documentary and proxy records agree? Clim. Change 168, (2021).	*	printed in supplementary materials in paper
199	p	precipitation	annual		1560	1830	271			Angola	Angola	Africa	1				-22	-6	12	28	2	based on graph in paper	Portuguese amateur observations of weather extremes along the Atlantic coast and very secondarily from African oral traditions	not specified in paper	reports of droughts, famines and diseases		time series of precipitation variability; excess rains, droughts (incl. strength: short localized, significant, serious, catastrophic), famines and diseases	dryness-wetness catalog	direct observed	yes	i		Miller, Joseph C. “The Significance of Drought, Disease and Famine in the Agriculturally Marginal Zones of West-Central Africa.” Journal of African History 23 (1982): 17–61.	*	graph in paper, could be transformed into an index
200	p	precipitation	annual		1750	1798	49			Guinea Coast	Guinea Coast	Africa	1		5.1037	1.241					1	Cape Coast Castle	logbooks of the Royal Navy, letters (official and private), dictionaries, narratives and schoolbooks	National Archives at Kew, London	descriptions of weather/climate (rain, droughts), harvest, health/mortality, slave trade		seven-point ordinal index: -3/3= famine, scarcity of corn/drought, weak rains/little rain or dry ponds, 0= no information, wet years=normal=1, wet rainy season, severe rainy season	dryness-wetness index	direct observed	yes	i	stefan.c.norrgard@abo.fi	Norrgård, Stefan. A New Climatic Periodisation of the Gold and Guinea Coasts in West Africa, 1750–1798: A Reconstruction of the Climate During the Slave Trade Era, Including an Analysis of the Climatically Facilitated Trans-Atlantic Slave Trade. Åbo: Åbo Akademi University Press, 2013.	*	Appendix A in paper
201	p	precipitation	annual, decadal		1750	1800	51			West Africa	West Africa	Africa	1				5	16	-17	10	2	West Africa, based on graph in paper	travel journals and biographies ,letters written by the CCC’s chief governor(responsible for all British castles on the Gold Coast in the Guinea coast region of West Africa)	The National Archives at Kew, London	descriptions of characteristics of seasonal rains and their impacts	onset and intensity of the seasonal rains and their effect on daily life at the castles.	six-point wetness index: 3=very wet, 2=heavy rain, 1=normal, -1=little rain, -2=lack of water/rain, -3=famines/drought	dryness-wetness index	direct observed	yes	i	stefan.c.norrgard@abo.fi	Norrgård, Stefan. “Practising Historical Climatology in West Africa: A Climatic Periodisation 1750–1800.” Climatic Change 129 (2015): 131–43.	*	graph in paper
202	t	temperature	annual	AMJJAS	1833	1900	68			Lesotho	Lesotho	Africa	1				-30.5	-28.5	27.5	29.5	2	based on graph in paper	letters, diaries, reports, monographs and newspaper articles written by missionaries and colonial officials who lived in, and travelled through, Lesotho and surrounding regions	School of Oriental and African Studies (University of London) and Bodleian Library of Commonwealth and African Studies at Rhodes House (University of Oxford) in the UK, and at the Lesotho National Archive, Morija Museum and Archives and National University of Lesotho library in Lesotho	observations of climate and climate-related phenomena	references to cold season weather phenomena, accounts of weather events such as snowfalls, frost/ground ice, hail, rain, fog, wind and storms/lightning, together with information about river levels and crop/vegetation condition	Very severe (‘‘much colder than normal’’), Severe (‘‘colder than normal’’), Normal/mild; includes a confidence rating	temperature index	direct observed	yes	i	stefan.grab@wits.ac.za	Grab, S. W., David, A. E. & Nash, J. Documentary evidence of climate variability during cold seasons in Lesotho, southern Africa, 1833-1900. doi:10.1007/s00382-009-0598-4.	*	table in paper
203	p	precipitation	annual	JASONDJFMAMJ	1824	1900	77			Lesotho	Lesotho	Africa	1		-29.08	26.92					0	Neukom et al. 2014	English-, French- and Sesotho-language letters, journals and reports written by missionaries and colonial authorities, which were supplemented by newspapers, diaries, travelogues and other historical sources	Lesotho National Archive (Maseru) and the Morija Museum and Archives, and archives in South Africa and the UK	descriptions of local climatic variability and the occurrence of events (droughts and floods, threat to livelihoods or communication routes), harvest quality, road conditions, river levels		five-point ordinal wetness index: -2/2 = very dry/drought, relatively dry, normal, relative wet, very wet/floods	dryness-wetness index	direct observed	yes	i	d.j.nash@bton.ac.uk	Nash, David J., and Stefan W. Grab. “‘A Sky of Brass and Burning Winds’: Documentary Evidence of Rainfall Variability in the Kingdom of Lesotho, Southern Africa, 1824–1900.” Climatic Change 101 (2010): 617–53.	x	https://www.ncdc.noaa.gov/paleo-search/study/14788
204	p	precipitation	annual	JASONDJFMAMJ	1840	1900	61			Kalahari	Botswana	Africa	1		-25	26					0	Neukom et al. 2014	documents by hunters, explorers and missionaries, monographs and travelogues	Council for World Mission (CWM) archive, School of Oriental and African Studies, University of London.		reference to local rainfall variability, many regarding climatic events hindering mobility or posing a threat to livelihoods; index value for each rain-year = July to June	five-point ordinal wetness index: -2/2 = very dry/drought, relatively dry, normal, relative wet, very wet/floods	dryness-wetness index	direct observed	yes	i	d.j.nash@bton.ac.uk	Nash, David J., and Georgina H. Endfield. “‘Splendid Rains Have Fallen’: Links Between El Niño and Rainfall Variability in the Kalahari, 1840–1900.” Climatic Change 86 (2008): 257–90; Nash, David J. and Georgina H. Endfield. "A 19th century climate chronology for the Kalahari region of central southern Africa derived from missionary correspondence." Int J Climatol 22 (2002): 821–841.	x	https://www.ncdc.noaa.gov/paleo-search/study/14788
205	p	precipitation	seasonal		1836	1900	65			southeast Africa (KwaZulu-Natal, South Africa)	South Africa	Africa	1				-31	-27	29	33	2	KwaZulu-Natal, South Africa; region based on graph in paper	newspapers; colonial and missionary materials (monographs, diaries..)	Bodleian Library at Rhodes House, University of Oxford, UK; British Library, London, UK; Council for World Mission archive, SOAS, London, UK; Evangelisch-lutherisches Missionswerk Niedersachsen, Archiv, Hermannsburg,Germany; Houghton Library, Harvard University, USA; Killie Campbell Africana Library, University of KwaZulu-Natal, Durban, South Africa; Msunduzi Municipal Library, Pietermaritzburg, …		information on climate and climate-dependent phenomena (7220 quotations or other observations)	five-point ordinal wetness index: -2/2 = very dry/drought, relatively dry, normal, relative wet, very wet/floods	dryness-wetness index	direct observed	yes	i	d.j.nash@bton.ac.uk	Nash, David J. et al. "Seasonal rainfall variability in southeast Africa during the nineteenth century reconstructed from documentary sources." Climatic Change 134 (2016): 605-619.	x	PAGES 2k: ID599
206	p	precipitation	annual		1821	1900	80		1996	Southern Cape	South Africa	Africa	1		-34	20					0	Neukom et al. 2014	missionary, official, bank and newspaper reports, traveller’s writings	e.g. National Archives in Cape Town, South African National Archives Pretoria, archives at University of the Witwatersrand		descriptions of the prevailing weather, harvest, economy; instrumental measurements	five-point ordinal wetness index: -2/2 = very dry/ severe drought, dry/ month of no rain reported, seasonal rains, wet/good rains, very wet/severe floods	dryness-wetness index	direct observed	yes	i	Coleen.Vogel@wits.ac.za	Vogel, Coleen H. “A Documentary-Derived Climatic Chronology for South Africa, 1820–1900.” Climatic Change 14 (1989): 291–307.; Kelso, Clare, and Coleen Vogel. “The Climate of Namaqualand in the Nineteenth Century.” Climatic Change 83 (2007): 357–80.	x	https://www.ncdc.noaa.gov/paleo-search/study/14788
207	p	precipitation	annual		1821	1900	80		2007	Eastern Cape	South Africa	Africa	1		-34	23.9					0	Neukom et al. 2014	missionary, official, bank and newspaper reports, traveller’s writings	e.g. National Archives in Cape Town, South African National Archives Pretoria, archives at University of the Witwatersrand		descriptions of the prevailing weather, harvest, economy; instrumental measurements	five-point ordinal wetness index: -2/2 = very dry/ severe drought, dry/ month of no rain reported, seasonal rains, wet/good rains, very wet/severe floods	dryness-wetness index	direct observed	yes	i	Coleen.Vogel@wits.ac.za	Vogel, Coleen H. “A Documentary-Derived Climatic Chronology for South Africa, 1820–1900.” Climatic Change 14 (1989): 291–307.; Kelso, Clare, and Coleen Vogel. “The Climate of Namaqualand in the Nineteenth Century.” Climatic Change 83 (2007): 357–80.	x	https://www.ncdc.noaa.gov/paleo-search/study/14788
208	p	precipitation	annual		1817	1900	84		1997	Namaqualand	South Africa	Africa	1		-29	17					0	Neukom et al. 2014	missionary, official, bank and newspaper reports, traveller’s writings	e.g. National Archives in Cape Town, South African National Archives Pretoria, archives at University of the Witwatersrand		descriptions of the prevailing weather, harvest, economy; instrumental measurements	five-point ordinal wetness index: -2/2 = drought, dry, normal, wet, flooding	dryness-wetness index	direct observed	yes	i	Coleen.Vogel@wits.ac.za	Vogel, Coleen H. “A Documentary-Derived Climatic Chronology for South Africa, 1820–1900.” Climatic Change 14 (1989): 291–307.; Kelso, Clare, and Coleen Vogel. “The Climate of Namaqualand in the Nineteenth Century.” Climatic Change 83 (2007): 357–80.	x	https://www.ncdc.noaa.gov/paleo-search/study/14788
209	p	precipitation	annual	ONDJFM	1796	1996	201			southern Africa	South Africa, plus Angola, Botswana, Lesotho, Malawi, Mozambique, Namibia, Swaziland, Zambia and Zimbabwe	Africa	1				-35	-10	10	50	0	Neukom et al. 2014	Nash and Endfield (2002, 2008), Kelso and Vogel (2007), Nash and Grab (2010), Vogel (1989)	Nash and Endfield (2002, 2008), Kelso and Vogel (2007), Nash and Grab (2010), Vogel (1989)		Coral, tree-ring, documentary, early instrumental	Summer rainfall zone (October–March)	precipitation reconstruction	multiproxy, direct observed	no	r (multiproxy)	raphael.neukom@giub.unibe.ch	Neukom, Raphael et al. “Multi-Proxy Summer and Winter Precipitation Reconstruction for Southern Africa Over the Last 200 Years.” Climate Dynamics 42 (2014): 2713–26.	x	https://www.ncdc.noaa.gov/paleo-search/study/14788
210	p	precipitation	annual	AMJJAS	1817	1999	183			southern Africa	South Africa, plus Angola, Botswana, Lesotho, Malawi, Mozambique, Namibia, Swaziland, Zambia and Zimbabwe	Africa	1				-35	-10	10	50	0	Neukom et al. 2014	Nash and Endfield (2002, 2008), Kelso and Vogel (2007), Nash and Grab (2010), Vogel (1989)	Nash and Endfield (2002, 2008), Kelso and Vogel (2007), Nash and Grab (2010), Vogel (1989)		Coral, tree-ring, documentary, early instrumental	Winter rainfall zone (April-September (AMJJAS))	precipitation reconstruction	multiproxy, direct observed	no	r (multiproxy)	raphael.neukom@giub.unibe.ch	Neukom, Raphael et al. “Multi-Proxy Summer and Winter Precipitation Reconstruction for Southern Africa Over the Last 200 Years.” Climate Dynamics 42 (2014): 2713–26.	x	https://www.ncdc.noaa.gov/paleo-search/study/14788
211	p	precipitation	annual	AMJJAS	1796	1854	59			Cape Town	South Africa	Africa	1	42	-33.97	18.6					0		ship logbooks (56,042 records)	archives in the United Kingdom, Spain, Netherlands and France resulted in the development of the CLIWOC project		Wind direction and wind speed observations + Reanalysis & station data	reconstructed precipitation anomalies Cape Town (AMJJAS)	precipitation reconstruction	direct observed, measured	yes	r	m.hannaford@sheffield.ac.uk	Hannaford, Matthew J. et al. "Early-nineteenth-century southern African precipitation reconstructions from ships' logbooks." The Holocene 25 (2015): 379-390.	x	https://www.ncdc.noaa.gov/paleo-search/study/18655
212	p	precipitation	annual	NDJFM	1796	1854	59			Mthatha	South Africa	Africa	1	742	-31.53	28.67					0		ship logbooks (56,042 records)	archives in the United Kingdom, Spain, Netherlands and France resulted in the development of the CLIWOC project		Wind direction and wind speed observations + Reanalysis & station data	reconstructed precipitation anomalies Mthatha (NDJFM)	precipitation reconstruction	direct observed, measured	yes	r	m.hannaford@sheffield.ac.uk	Hannaford, Matthew J. et al. "Early-nineteenth-century southern African precipitation reconstructions from ships' logbooks." The Holocene 25 (2015): 379-390.	x	https://www.ncdc.noaa.gov/paleo-search/study/18655
213	p	precipitation	annual	NDJFM	1796	1854	59			Royal National Park	South Africa	Africa	1	1392	-28.6858	28.9542					0		ship logbooks (56,042 records)	archives in the United Kingdom, Spain, Netherlands and France resulted in the development of the CLIWOC project		Wind direction and wind speed observations + Reanalysis & station data	reconstructed precipitation anomalies Royal National Park (NDJFM)	precipitation reconstruction	direct observed, measured	yes	r	m.hannaford@sheffield.ac.uk	Hannaford, Matthew J. et al. "Early-nineteenth-century southern African precipitation reconstructions from ships' logbooks." The Holocene 25 (2015): 379-390.	x	https://www.ncdc.noaa.gov/paleo-search/study/18655
214	p	precipitation	annual	ONDJFMA	1845	1900	56			Central Namibia	Namibia	Africa	1				-19.05	-15.95	21.25	23.4333	0		official missionary (RMS, Rhenish=of the River Rhine) reports, chronicles; letters, diaries and memoirs of various missionaries; from 1894/95 onwards: annual reports by district officials, journals of resident magistrates (German Colonial period); diraries and letters by Europeans staying or travelling in the area	Archives of the Mission 21, Basel, Switzerland; Archives of the Evangelical Lutheran Church, Windhoek, Namibia; Western Cape Provincial Archives, Cape Town; National Archives of Namibia; Archives of the United Evangelical Mission (VEM), Wuppertal, Germany; Basler Afrika Bibliographien	information on climate, environment, agriculture (e.g. state of grass/grazing/crops, river flow) and health/diseases		annual five-point ordinal wetness index: -2/2 = very dry/drought, relatively dry, normal, relative wet, very wet/floods	wetness-dryness index	direct observed	yes	i	stefan.grab@wits.ac.za	Grab, Stefan and Zumthurm, Tizian. "The land and its climate knows no transition, no middle ground, everywhere too much or too little: a documentary-based climate chronology for central Namibia, 1845–1900." International Journal of Climatology 38 (2018): e643-e659.	x	will be published in Documentary Proxy Dataset, for now contact angela-maria.burgdorf@giub.unibe.ch
215	p	precipitation	monthly		1788	1860	73			south-eastern Australia (SEA) (five sub-regions)	Australia	South-West Pacific	5				-44	-26	136	154	2	based on graph in paper (SEA)	newspapers, contemporary publications, explorer’s diaries and personal diaries, official government report	Jevons (1859), Russell (1877), Russell (1887b), Hunt (1911), Hunt (1914), Hunt (1918), Watt (1936), Warren (1948), Foley (1957), McAfee (1981), Keating (1992), Callaghan and Helman (2008); (mostly secondary sources)	climate events like drought, flood and bushfires; flood, harvest, livestock, insect plagues	classified as drought years if more than 3 sources agree	documentary rainfall chronology in south-eastern Australia (SEA)	precipitation chronology	direct observed	yes	e	Joelle.Gergis@anu.edu.au	Fenby, Claire, and Joëlle Gergis. “Rainfall Variations in South-Eastern Australia Part 1: Consolidating Evidence from Pre-Instrumental Documentary Sources, 1788–1860.” International Journal of Climatology 33 (2013): 2956–72.
216	p	precipitation	annual		1788	1860	73	1860	2008	south-eastern Australia (SEA) (five sub-regions)	Australia	South-West Pacific	5				-34	-33	150	151.3	2	based on graph in paper (SEA)	documentary chronology of droughts and wet years in south-eastern Australia (SEA) 1788-1860; Australian Bureau of Meteorology rainfall data 1860–2008; multiproxy reconstruction Gergis et al. 2012 (12 natural proxies in the Australasian region)	Jevons (1859), Russell (1877), Russell (1887b), Hunt (1911), Hunt (1914), Hunt (1918), Watt (1936), Warren (1948), Foley (1957), McAfee (1981), Keating (1992), Callaghan and Helman (2008); (mostly secondary sources)		climate events like drought, flood and bushfires; flood, harvest, livestock, insect plagues; documentary, historical instrumental and modern rainfall observations combined	Eastern NSW drought and wet year index over the 1788–2008 period: wet, normal, dry	rainfall index	direct observed, measured	yes	i	Joelle.Gergis@anu.edu.au	Gergis, Joëlle, and Linden Ashcroft. “Rainfall Variations in South-Eastern Australia Part 2: A Comparison of Documentary, Early Instrumental and Palaeoclimate Records, 1788–2008.” International Journal of Climatology 33 (2013): 2973–87.	x	will be published in Documentary Proxy Dataset, for now contact angela-maria.burgdorf@giub.unibe.ch	PAGES 2k: ID451
217	w	wind	annual	DJF	1817	2014	198			northern Australia	Australia	South-West Pacific	5				-18	-5	98	138	0		ship logbooks	ICOADS	wind direction observations from ICOADS v3.0 (Freeman et al. 2017)	wind direction observations (westerly wind frequency in December, January and February)	Australian Monsoon Directional Index (AMDI) for DJF: percentage of days per month inside the domain [4S-18S, 98E-138E] with prevailing surface wind blowing from the western direction +/-45 degrees (i.e. between 225° and 315° from the true north).	Monsoon index	direct observed, measured	no	i	dgalpuy@upo.es	Gallego David et al. "The steady increase of the Australian Summer Monsoon in the last 200 years." Scientific Reports 7 (2017): 16166.	x	https://www.upo.es/vareclim/Data/AMDI.txt
218	w	wind	monthly	Dec	1800	2014	215			northern Australia	Australia	South-West Pacific	5				-18	-5	98	138	0		ship logbooks	ICOADS	wind direction observations from ICOADS v3.0 (Freeman et al. 2017)	wind direction observations (westerly wind frequency in December)	Australian Monsoon Directional Index (AMDI) for Dec: percentage of days per month inside the domain [4S-18S, 98E-138E] with prevailing surface wind blowing from the western direction +/-45 degrees (i.e. between 225° and 315° from the true north).	Monsoon index	direct observed, measured	no	i	dgalpuy@upo.es	Gallego David et al. "The steady increase of the Australian Summer Monsoon in the last 200 years." Scientific Reports 7 (2017): 16166.	x	https://www.upo.es/vareclim/Data/AMDI.txt
219	w	wind	monthly	Jan	1802	2014	213			northern Australia	Australia	South-West Pacific	5				-18	-5	98	138	0		ship logbooks	ICOADS	wind direction observations from ICOADS v3.0 (Freeman et al. 2017)	wind direction observations (westerly wind frequency in January)	Australian Monsoon Directional Index (AMDI) for Jan: percentage of days per month inside the domain [4S-18S, 98E-138E] with prevailing surface wind blowing from the western direction +/-45 degrees (i.e. between 225° and 315° from the true north).	Monsoon index	direct observed, measured	no	i	dgalpuy@upo.es	Gallego David et al. "The steady increase of the Australian Summer Monsoon in the last 200 years." Scientific Reports 7 (2017): 16166.	x	https://www.upo.es/vareclim/Data/AMDI.txt
220	w	wind	monthly	Feb	1801	2014	214			northern Australia	Australia	South-West Pacific	5				-18	-5	98	138	0		ship logbooks	ICOADS	wind direction observations from ICOADS v3.0 (Freeman et al. 2017)	wind direction observations (westerly wind frequency in February)	Australian Monsoon Directional Index (AMDI) for Feb: percentage of days per month inside the domain [4S-18S, 98E-138E] with prevailing surface wind blowing from the western direction +/-45 degrees (i.e. between 225° and 315° from the true north).	Monsoon index	direct observed, measured	no	i	dgalpuy@upo.es	Gallego David et al. "The steady increase of the Australian Summer Monsoon in the last 200 years." Scientific Reports 7 (2017): 16166.	x	https://www.upo.es/vareclim/Data/AMDI.txt
221	t	temperature	annual		1718	1852	135			Churchill	Canada	North America	4		58.7684	-94.165					1	Churchill	Hudson’s Bay Company records	London	daily weather descriptions (wind direction, type and strength, precip, cloud cover, temperature, general weather, melting/freezing, drift)	First day of snow in the fall		first snow time series	direct observed, measured	yes	ts	timothyball@shaw.ca	Ball, T.F. “Historical and Instrumental Evidence of Climate: Western Hudson Bay, Canada, 1714–1850.” In Climate since A.D. 1500, edited by R.S. Bradley and P.D. Jones, revised ed., 40–73. London: Routledge, 1995	*	graphs in book chaper
222	t	temperature	annual		1715	1851	137			York Factory	Canada	North America	4		57.0049	-92.3107					1	York Factory	Hudson’s Bay Company records	London	daily weather descriptions (wind direction, type and strength, precip, cloud cover, temperature, general weather, melting/freezing, drift)	First day of snow in the fall		first snow time series	direct observed, measured	yes	ts	timothyball@shaw.ca	Ball, T.F. “Historical and Instrumental Evidence of Climate: Western Hudson Bay, Canada, 1714–1850.” In Climate since A.D. 1500, edited by R.S. Bradley and P.D. Jones, revised ed., 40–73. London: Routledge, 1995	*	graphs in book chaper
223	p	precipitation	annual		1718	1859	142			Churchill	Canada	North America	4		58.7684	-94.165					1	Churchill	Hudson’s Bay Company records	London	daily weather descriptions (wind direction, type and strength, precip, cloud cover, temperature, general weather, melting/freezing, drift)	First day of rain in the spring		first rain time series	direct observed, measured	yes	ts	timothyball@shaw.ca	Ball, T.F. “Historical and Instrumental Evidence of Climate: Western Hudson Bay, Canada, 1714–1850.” In Climate since A.D. 1500, edited by R.S. Bradley and P.D. Jones, revised ed., 40–73. London: Routledge, 1995	*	graphs in book chaper
224	p	precipitation	annual		1715	1851	137			York Factory	Canada	North America	4		57.0049	-92.3107					1	York Factory	Hudson’s Bay Company records	London	daily weather descriptions (wind direction, type and strength, precip, cloud cover, temperature, general weather, melting/freezing, drift)	First day of rain in the spring		first rain time series	direct observed, measured	yes	ts	timothyball@shaw.ca	Ball, T.F. “Historical and Instrumental Evidence of Climate: Western Hudson Bay, Canada, 1714–1850.” In Climate since A.D. 1500, edited by R.S. Bradley and P.D. Jones, revised ed., 40–73. London: Routledge, 1995	*	graphs in book chaper
225	t	temperature	annual		1718	1839	122			Churchill	Canada	North America	4		58.7684	-94.165					1	Churchill	Hudson’s Bay Company records	London	daily weather descriptions (wind direction, type and strength, precip, cloud cover, temperature, general weather, melting/freezing, drift)	First day of frost in the fall		first autumn frost time series	direct observed, measured	yes	ts	timothyball@shaw.ca	Ball, T.F. “Historical and Instrumental Evidence of Climate: Western Hudson Bay, Canada, 1714–1850.” In Climate since A.D. 1500, edited by R.S. Bradley and P.D. Jones, revised ed., 40–73. London: Routledge, 1995	*	graphs in book chaper
226	t	temperature	annual		1715	1837	123			York Factory	Canada	North America	4		57.0049	-92.3107					1	York Factory	Hudson’s Bay Company records	London	daily weather descriptions (wind direction, type and strength, precip, cloud cover, temperature, general weather, melting/freezing, drift)	First day of frost in the fall		first autumn frost time series	direct observed, measured	yes	ts	timothyball@shaw.ca	Ball, T.F. “Historical and Instrumental Evidence of Climate: Western Hudson Bay, Canada, 1714–1850.” In Climate since A.D. 1500, edited by R.S. Bradley and P.D. Jones, revised ed., 40–73. London: Routledge, 1995	*	graphs in book chaper
227	t	temperature	annual		1718	1838	121			Churchill	Canada	North America	4		58.7684	-94.165					1	Churchill	Hudson’s Bay Company records	London	daily weather descriptions (wind direction, type and strength, precip, cloud cover, temperature, general weather, melting/freezing, drift)	First day of melting in the spring		first spring melt time series	direct observed, measured	yes	ts	timothyball@shaw.ca	Ball, T.F. “Historical and Instrumental Evidence of Climate: Western Hudson Bay, Canada, 1714–1850.” In Climate since A.D. 1500, edited by R.S. Bradley and P.D. Jones, revised ed., 40–73. London: Routledge, 1995	x	will be published in Documentary Proxy Dataset, for now contact angela-maria.burgdorf@giub.unibe.ch
228	t	temperature	annual		1715	1836	122			York Factory	Canada	North America	4		57.0049	-92.3107					1	York Factory	Hudson’s Bay Company records	London	daily weather descriptions (wind direction, type and strength, precip, cloud cover, temperature, general weather, melting/freezing, drift)	First day of melting in the spring		first spring melt time series	direct observed, measured	yes	ts	timothyball@shaw.ca	Ball, T.F. “Historical and Instrumental Evidence of Climate: Western Hudson Bay, Canada, 1714–1850.” In Climate since A.D. 1500, edited by R.S. Bradley and P.D. Jones, revised ed., 40–73. London: Routledge, 1995	x	will be published in Documentary Proxy Dataset, for now contact angela-maria.burgdorf@giub.unibe.ch
229	p	precipitation	annual	ONDJFMAM	1718	1850	133			Churchill	Canada	North America	4		58.7684	-94.165					1	Churchill	Hudson’s Bay Company records	London	daily weather descriptions (wind direction, type and strength, precip, cloud cover, temperature, general weather, melting/freezing, drift)	Number of days with snowfall, October through May.		snowfall days time series	direct observed, measured	yes	ts	timothyball@shaw.ca	Ball, T.F. “Historical and Instrumental Evidence of Climate: Western Hudson Bay, Canada, 1714–1850.” In Climate since A.D. 1500, edited by R.S. Bradley and P.D. Jones, revised ed., 40–73. London: Routledge, 1995	*	graphs in book chaper
230	p	precipitation	annual	ONDJFMAM	1715	1850	136			York Factory	Canada	North America	4		57.0049	-92.3107					1	York Factory	Hudson’s Bay Company records	London	daily weather descriptions (wind direction, type and strength, precip, cloud cover, temperature, general weather, melting/freezing, drift)	Number of days with snowfall, October through May.		snowfall days time series	direct observed, measured	yes	ts	timothyball@shaw.ca	Ball, T.F. “Historical and Instrumental Evidence of Climate: Western Hudson Bay, Canada, 1714–1850.” In Climate since A.D. 1500, edited by R.S. Bradley and P.D. Jones, revised ed., 40–73. London: Routledge, 1995	*	graphs in book chaper
231	p	precipitation	annual		1718	1850	133			Churchill	Canada	North America	4		58.7684	-94.165					1	Churchill	Hudson’s Bay Company records	London	daily weather descriptions (wind direction, type and strength, precip, cloud cover, temperature, general weather, melting/freezing, drift)	Number of days with rainfall, January through December.		rainfall days time series	direct observed, measured	yes	ts	timothyball@shaw.ca	Ball, T.F. “Historical and Instrumental Evidence of Climate: Western Hudson Bay, Canada, 1714–1850.” In Climate since A.D. 1500, edited by R.S. Bradley and P.D. Jones, revised ed., 40–73. London: Routledge, 1995	*	graphs in book chaper
232	p	precipitation	annual		1715	1850	136			York Factory	Canada	North America	4		57.0049	-92.3107					1	York Factory	Hudson’s Bay Company records	London	daily weather descriptions (wind direction, type and strength, precip, cloud cover, temperature, general weather, melting/freezing, drift)	Number of days with rainfall, January through December.		rainfall days time series	direct observed, measured	yes	ts	timothyball@shaw.ca	Ball, T.F. “Historical and Instrumental Evidence of Climate: Western Hudson Bay, Canada, 1714–1850.” In Climate since A.D. 1500, edited by R.S. Bradley and P.D. Jones, revised ed., 40–73. London: Routledge, 1995	*	graphs in book chaper
233	t	temperature	monthly		1751	1869	119			Churchill/York Factory	Canada	North America	4				57.0049	58.7684	-94.164	-92.3107	2	based on graph in paper	Ships’ Log-Books from Hudson’s Bay Company	Hudson's Bay Company Archives (HBCA), Provincial Archives of Manitoba (PAM)	detailed descriptions of encountered ice	ice severity during the approach to Churchill/York Factory (Western Hudson Bay)	ice severity index based on a daily ice index derived from both the severity and the relative lateness (see Catchpole and Halpin 1987 for the method)	summer ice severity	direct observed	yes	i		Catchpole, A.J.W. “Hudson’s Bay Company Ships’ Log-Books as Sources of Sea Ice Data, 1751–1870.” In Climate since A.D. 1500, edited by R.S. Bradley and P.D. Jones, revised ed., 17–39. London: Routledge, 1995	*	angie
234	t	temperature	monthly		1750	1870	121			Moose Factory	Canada	North America	4		51.2625	-80.593					1	Moose Factory	Ships’ Log-Books from Hudson’s Bay Company	Hudson's Bay Company Archives (HBCA), Provincial Archives of Manitoba (PAM)	detailed descriptions of encountered ice	ice severity during the approach to Moose Factory (Eastern Hudson Bay)	ice severity index based on a daily ice index derived from both the severity and the relative lateness (see Catchpole and Halpin 1987 for the method)	summer ice severity	direct observed	yes	i		Catchpole, A.J.W. “Hudson’s Bay Company Ships’ Log-Books as Sources of Sea Ice Data, 1751–1870.” In Climate since A.D. 1500, edited by R.S. Bradley and P.D. Jones, revised ed., 17–39. London: Routledge, 1995	*	angie
235	t	temperature	annual	ON	1799	1994	196			Winnipeg	Canada	North America	4		50	-97.25					0		diaries by clergymen, diaries and letters from individuals, incidental accounts by travellers and explorers, newspapers	Hudson's Bay Company Archives, Manitoba Archives	phenological records	records of ice freeze-up of Red River	ice freeze-up of Red River	ice freeze up series	indirect inorganic	yes	ts		Rannie, W.F. "Breakup and freezeup of the Red River at Winnipeg, Manitoba Canada in the 19th century and some climatic implications." Climatic Change 5 (1983): 283-296.	x	http://nsidc.org/data/lake_river_ice/freezethaw.html
236	t	temperature	annual	MA	1799	1994	196			Winnipeg	Canada	North America	4		50	-97.25					0		diaries by clergymen, diaries and letters from individuals, incidental accounts by travellers and explorers, newspapers	Hudson's Bay Company Archives, Manitoba Archives	phenological records	records of break-up of Red River	ice break-up of Red River	ice break up series	indirect inorganic	yes	ts		Rannie, W.F. "Breakup and freezeup of the Red River at Winnipeg, Manitoba Canada in the 19th century and some climatic implications." Climatic Change 5 (1983): 283-296.	x	http://nsidc.org/data/lake_river_ice/freezethaw.html
237	t	temperature	annual		1640	1820	181			New England	USA	North America	4				41	47	-73.5	-67	1	New England	diaries, almanacs, newspapers, periodicals,	over 150 archives	weather observations (references to storms, droughts and other climatic phenomena) daily, monthly and seasonally	temperature index scale: -14 (very coldest), 0 (normal), 14 (very hottest)	temperature index scale: -14 (very coldest), 0 (normal), 14 (very hottest)	temperature index	direct observed	yes	i		Baron, W.R. “Historical Climate Records from the Northeastern United States, 1640 to 1900.” In Climate since A.D. 1500, edited by R.S. Bradley and P.D. Jones, revised ed., 74–91. London: Routledge, 1995.	*	graphs in book chaper
238	p	precipitation	annual		1640	1820	181			New England	USA	North America	4				41	47	-73.5	-67	1	New England	diaries, almanacs, newspapers, periodicals,	over 150 archives	weather observations (references to storms, droughts and other climatic phenomena) daily, monthly and seasonally	New England precipitation index	precipitation index scale: -10, 0, 10	precipitation index	direct observed	yes	i		Baron, W.R. “Historical Climate Records from the Northeastern United States, 1640 to 1900.” In Climate since A.D. 1500, edited by R.S. Bradley and P.D. Jones, revised ed., 74–91. London: Routledge, 1995.	*	graphs in book chaper
239	p	precipitation	annual		1710	1800	91			Southern New England	USA	North America	4				41	47	-73.5	-67	1	New England	diaries, almanacs, newspapers, periodicals,	over 150 archives	weather observations (references to storms, droughts and other climatic phenomena) daily, monthly and seasonally	Southern New England precipitation index based on daily diaries	0 (no precipitation) to 30 (wettest day ever remembered)	percipitation index	direct observed	yes	i		Baron, W.R. “Historical Climate Records from the Northeastern United States, 1640 to 1900.” In Climate since A.D. 1500, edited by R.S. Bradley and P.D. Jones, revised ed., 74–91. London: Routledge, 1995.	*	graphs in book chaper
240	p	precipitation	annual		1752	1900	149			Southern New Hampshire	USA	North America	4				41	47	-73.5	-67	1	New England	diaries, almanacs, newspapers, periodicals,	over 150 archives	weather observations (references to storms, droughts and other climatic phenomena) daily, monthly and seasonally	length of growing season in New Hampshire		growing season length	direct observed	yes	i		Baron, W.R. “Historical Climate Records from the Northeastern United States, 1640 to 1900.” In Climate since A.D. 1500, edited by R.S. Bradley and P.D. Jones, revised ed., 74–91. London: Routledge, 1995.	*	graphs in book chaper
241	w	wind	annual		1700	1855	156			Atlantic	Atlantic	North America	4				0	48	-90	-15	2	based on graph in paper	newspaper accounts, weather diaries, and ships’ logbooks.	various places (US, Spain, UK)	important political and economic affairs of the colonies, storm damage, floods, wind…	references to cyclones and their impact		cyclone chronology	direct observed	yes	e	mike.chenoweth@verizon.net	Chenoweth, Michael. “A Reassessment of Historical Atlantic Basin Tropical Cyclone Activity, 1700–1855.” Climatic Change 76 (2006): 169–240.; Chenoweth, Michael. “A New Compilation of North Atlantic Tropical Cyclones, 1851–98*. Journal of Climate 27 (2014): 8674̣–8685.	*	table printed in article
242	w	wind	annual		1495	1825	331			Caribbean	Caribbean	North America	4				15	25	-85	-60	0		643 registers in the Registros de Ida, ship logs	General Archive of the Indies (AGI)	spanish ship registers	656 Spanish shipwreck events that occurred in the Caribbean	tropical cyclone count	tropical cyclone count	direct observed	yes	e	trouet@ltrr.arizona.edu	Trouet, Valerie et al. Shipwreck rates reveal Caribbean tropical cyclone response to past radiative forcing. Proceedings of the National Academy of Sciences, 113 (2016): 3169-3174.	x	https://www.ncdc.noaa.gov/paleo-search/study/20105
243	t	temperature	annual	AMJJ	1256	1431	176			East Anglia	UK	Europe	6				52	53	0.5	1.75	2	based on graph in paper	Manorial accounts	Norwich Cathedral Priory; Estates of the Bishop of Norwich, St Giles’s Hospital, Heacham, Hunstanton & Ringstead.St Benet’s Abbey of Hulme	reports on the cost and profits of the farming activities on the manor; list expenses and receipts, the state of the agricultural and pastoral sectors; grain harvest dates and length, weather references,	reports on the cost and profits of the farming activities on the manor; list expenses and receipts, the state of the agricultural and pastoral sectors; grain harvest dates and length, weather references,	reconstruction April-July mean temperature	temperature reconstruction	direct observed, indirect organic	yes	r	k.pribyl@brighton.ac.uk	Pribyl, Kathleen et al. “Reconstructing Medieval April–July Mean Temperatures in East Anglia, 1256–1431.” Climatic Change 113 (2012): 393–412.
244	t	temperature	annual	AMJJ	1256	1431	176			East Anglia	UK	Europe	6				52	53	0.5	1.75	2	based on graph in paper	Manorial accounts	Norwich Cathedral Priory; Estates of the Bishop of Norwich, St Giles’s Hospital, Heacham, Hunstanton & Ringstead.St Benet’s Abbey of Hulme	reports on the cost and profits of the farming activities on the manor; list expenses and receipts, the state of the agricultural and pastoral sectors; grain harvest dates and length, weather references,	reports on the cost and profits of the farming activities on the manor; list expenses and receipts, the state of the agricultural and pastoral sectors; grain harvest dates and length, weather references,	Langham harvest date series (1768–1867)	harvest date	direct observed, indirect organic	yes	ts	k.pribyl@brighton.ac.uk	Pribyl, Kathleen et al. “Reconstructing Medieval April–July Mean Temperatures in East Anglia, 1256–1431.” Climatic Change 113 (2012): 393–412.
245	t	temperature	monthly		1205	1429	225			England	England	Europe	6				50	59	-9	2	2	based on graph in paper	England: medieval annals, chronicles, account rolls (church)	not specified in paper	weather descriptions, temperature and precipitation descriptions, corp failures, extreme events	monthly temperature indices for England	monthly temperature ±3 = particularly severe month, ±2 = hotter/wetter than normal	temperature index	direct observed	yes	i	astrid.ogilvie@colorado.edu	Ogilvie, Astrid E.J., and Graham Farmer. “Documenting the Medieval Climate.” In Climates of the British Isles: Present, Past and Future, edited by Mike Hulme and Elaine Barrow, 112–33. London: Routledge, 1997.	*	table printed in book chapter
246	p	precipitation	monthly		1202	1431	230			England	England	Europe	6				50	59	-9	2	2	based on graph in paper	England: medieval annals, chronicles, account rolls (church)	not specified in paper	weather descriptions, temperature and precipitation descriptions, corp failures, extreme events	monthly precipitation indices for England	monthly precipitation ±3 = particularly severe month, ±2 = wetter than normal	precipitation index	direct observed	yes	i	astrid.ogilvie@colorado.edu	Ogilvie, Astrid E.J., and Graham Farmer. “Documenting the Medieval Climate.” In Climates of the British Isles: Present, Past and Future, edited by Mike Hulme and Elaine Barrow, 112–33. London: Routledge, 1997.	*	table printed in book chapter
247	t	cryosphere	annual		1601	1780	180			Iceland	Iceland	Europe	6		64.9631	-19.0208					1	Iceland	sagas, historical annals, works on geography and history, travellers' account, descriptions of Iceland, official reports on crops and weather and early meteorological observations	National Archives, Reykjavik,		reports on ice occurrence, sea-ice records, severe weather; see Ogilvie (1981) for details on the indices	sea ice index; regional winter/spring thermal indices	sea ice index	direct observed, indirect inorganic	yes	i	astrid.ogilvie@colorado.edu	Ogilvie, A. E. J. The past climate and sea-ice record from Iceland, Part 1: Data to A.D. 1780. Climatic Change 6, 131–152 (1984). Ogilvie, A. E. J. & Jónsdóttir, I. Sea Ice, Climate, and Icelandic Fisheries in the Eighteenth and Nineteenth Centuries. ARCTIC 53, 383–394 (2000).	x	will be published in Documentary Proxy Dataset, for now contact angela-maria.burgdorf@giub.unibe.ch
248	w	wind	annual		1390	1725	336			North Sea Area (coasts of Belgium, Netherlands)	Belgium, Netherlands	Europe	6				51.833	51.15	2.74825	4.11507	1	Latitudes based on description in paper, longitudes don't seem to be correct, therefore google: North-eastern point: Goeree-Overflakkee, Netherlands; South-western point:Nieuwpoort, Belgium	annual accounts of coastal towns and series of accounts of dyke and dune maintenance (administrative documents concerning the annual maintenance of sea walls)	National Archives, The Hague; Regional Archives Middelharni; Zealand Archives, Middelburg; National Archives, Brussels; Archives Générales du Royaume (Brussels)		information about the maintenance of quays and wharves and vulnerable public buildings; storm and high tide events; indirect mentioning of damage to a precise storm date; annual number of high tides, storms and storm surges; storm intensity (1-8 grade system: high tides to storm surges)	Annual storm frequency, storm intensity index (1-8)	storm frequency-intensity index	direct observed	yes	i	krakeram@Zeelandnet.nl	De Kraker, Adriaan. “Reconstruction of Storm Frequency in the North Sea Area of the Pre-industrial Period, 1400-1625 and the Connection with Reconstructed Time Series of Temperatures.” Hydrological Sciences Journal 2 (2005): 51-69.; De Kraker, Adriaan. “Storminess in the Low Countries, 1390–1725.” Environment and History 19 (2013): 149–71.
249	t	temperature	annual	JJA	764	1705	942	1705	1998	Low Countries (present-day Netherlands and Belgian Flanders)	Netherlands, Belgium	Europe	6				50.7	53.5	2.5	7.2	1	Belgian Flanders and Netherlands	weather diaries, letters, annals, chronicles, accounts of townships, ship cargos, agriculture, water- and windmills, river tolls	not specified in paper	phenological reports, reports on harvest and more	length of frost period, freezing of rivers, lakes and seas, quality of harvest, price of agricultural products	reconstructed summer (June-August) temperatures based on 9 degree indices (extremely mild/cool to extremely severe/warm) ; instrumental data from 1705 onwards	temperature reconstruction	indirect inorganic	yes	r	shabalov@knmi.nl	Van Engelen, Aryan F.V. et al. “A Millennium of Weather, Winds and Water in the Low Countries.” In History and Climate: Memories of the Future?, edited by Philip D. Jones et al., 101–23. New York: Springer, 2001.; Shabalova, Marina V., and Aryan F.V. Van Engelen. “Evaluation of a Reconstruction of Winter and Summer Temperatures in the Low Countries, AD 764–1998.” Climatic Change 58 (2003): 219–42.	x	KNMI climate explorer: http://climexp.knmi.nl/getindices.cgi?WMO=KNMIData/nederland_yr&STATION=Tnetherlands&TYPE=i&id=someone@somewhere&NPERYEAR=1
250	t	temperature	annual	DJF	764	1705	942	1705	1998	Low Countries (present-day Netherlands and Belgian Flanders)	Netherlands, Belgium	Europe	6				50.7	53.5	2.5	7.2	1	Belgian Flanders and Netherlands	weather diaries, letters, annals, chronicles, accounts of townships, ship cargos, agriculture, water- and windmills, river tolls	not specified in paper	phenological reports, reports on harvest and more	length of frost period, freezing of rivers, lakes and seas, quality of harvest, price of agricultural products	reconstructed winter (December-February) temperatures based on 9 degree indices (extremely mild/cool to extremely severe/warm) ; instrumental data from 1705 onwards	temperature reconstruction	indirect inorganic	yes	r	shabalov@knmi.nl	Van Engelen, Aryan F.V. et al. “A Millennium of Weather, Winds and Water in the Low Countries.” In History and Climate: Memories of the Future?, edited by Philip D. Jones et al., 101–23. New York: Springer, 2001.; Shabalova, Marina V., and Aryan F.V. Van Engelen. “Evaluation of a Reconstruction of Winter and Summer Temperatures in the Low Countries, AD 764–1998.” Climatic Change 58 (2003): 219–42.	x	KNMI climate explorer: http://climexp.knmi.nl/getindices.cgi?WMO=KNMIData/nederland_yr&STATION=Tnetherlands&TYPE=i&id=someone@somewhere&NPERYEAR=1
251	t	temperature	annual	AMJJAS	1700	2005	306			Ribeauvillé; Riquewihr	France	Europe	6		48.17	7.28					0		Series published in recent literature, French books, French-language journals; Unpublished series collected from public organizations and services (Towns Archives, Chambers of Agriculture, Direction Departementale de l'Agriculture et de la Forêt, Meteo France, private winegrowers	Towns Archives, Chambers of Agriculture, Direction Departementale de l'Agriculture et de la Forêt, Meteo France	plant phenology record	GHD from Alsace	grape harvest date (GHD) series	grape harvest date (GHD) series	Indirect organic	yes	ts	valerie.daux@lsce.ipsl.fr	Daux, Valérie et al. “An Open-Access Database of Grape Harvest Dates for Climate Research: Data Description and Quality Assessment.” Climate of the Past 8 (2012): 1403–18.	x	https://www.ncdc.noaa.gov/paleo/study/13195
252	t	temperature	annual	AMJJAS	1799	1879	81			Chadeleuf	France	Europe	6		45.58	3.17					0		Series published in recent literature, French books, French-language journals; Unpublished series collected from public organizations and services (Towns Archives, Chambers of Agriculture, Direction Departementale de l'Agriculture et de la Forêt, Meteo France, private winegrowers	Towns Archives, Chambers of Agriculture, Direction Departementale de l'Agriculture et de la Forêt, Meteo France	plant phenology record	GHD from Auvergne	grape harvest date (GHD) series	grape harvest date (GHD) series	Indirect organic	yes	ts	valerie.daux@lsce.ipsl.fr	Daux, Valérie et al. “An Open-Access Database of Grape Harvest Dates for Climate Research: Data Description and Quality Assessment.” Climate of the Past 8 (2012): 1403–18.	x	https://www.ncdc.noaa.gov/paleo/study/13196
253	t	temperature	annual	AMJJAS	1751	1879	129			Auxerre-Avalon	France	Europe	6		47.78	3.57					0		Series published in recent literature, French books, French-language journals; Unpublished series collected from public organizations and services (Towns Archives, Chambers of Agriculture, Direction Departementale de l'Agriculture et de la Forêt, Meteo France, private winegrowers	Towns Archives, Chambers of Agriculture, Direction Departementale de l'Agriculture et de la Forêt, Meteo France	plant phenology record	GHD from Auvergne-Avalon	grape harvest date (GHD) series	grape harvest date (GHD) series	Indirect organic	yes	ts	valerie.daux@lsce.ipsl.fr	Daux, Valérie et al. “An Open-Access Database of Grape Harvest Dates for Climate Research: Data Description and Quality Assessment.” Climate of the Past 8 (2012): 1403–18.	x	https://www.ncdc.noaa.gov/paleo/study/13197
254	t	temperature	annual	AMJJAS	1449	2006	558			Pichon-Longueville	France	Europe	6		45.18	-0.75					0		Series published in recent literature, French books, French-language journals; Unpublished series collected from public organizations and services (Towns Archives, Chambers of Agriculture, Direction Departementale de l'Agriculture et de la Forêt, Meteo France, private winegrowers	Towns Archives, Chambers of Agriculture, Direction Departementale de l'Agriculture et de la Forêt, Meteo France	plant phenology record	GHD from Bordeaux	grape harvest date (GHD) series	grape harvest date (GHD) series	Indirect organic	yes	ts	valerie.daux@lsce.ipsl.fr	Daux, Valérie et al. “An Open-Access Database of Grape Harvest Dates for Climate Research: Data Description and Quality Assessment.” Climate of the Past 8 (2012): 1403–18.	x	https://www.ncdc.noaa.gov/paleo/study/13199
255	t	temperature	annual	AMJJAS	1354	2006	653			Dijon	France	Europe	6		47.32	5.04					0		Series published in recent literature, French books, French-language journals; Unpublished series collected from public organizations and services (Towns Archives, Chambers of Agriculture, Direction Departementale de l'Agriculture et de la Forêt, Meteo France, private winegrowers	Towns Archives, Chambers of Agriculture, Direction Departementale de l'Agriculture et de la Forêt, Meteo France	plant phenology record	GHD from Burgundy	grape harvest date (GHD) series	grape harvest date (GHD) series	Indirect organic	yes	ts	valerie.daux@lsce.ipsl.fr	Daux, Valérie et al. “An Open-Access Database of Grape Harvest Dates for Climate Research: Data Description and Quality Assessment.” Climate of the Past 8 (2012): 1403–18.	x	https://www.ncdc.noaa.gov/paleo/study/13200
256	t	temperature	annual	AMJJAS	1806	2006	201			Sézanne	France	Europe	6		49.04	3.97					0		Series published in recent literature, French books, French-language journals; Unpublished series collected from public organizations and services (Towns Archives, Chambers of Agriculture, Direction Departementale de l'Agriculture et de la Forêt, Meteo France, private winegrowers	Towns Archives, Chambers of Agriculture, Direction Departementale de l'Agriculture et de la Forêt, Meteo France	plant phenology record	GHD from Champagne 1	grape harvest date (GHD) series	grape harvest date (GHD) series	Indirect organic	yes	ts	valerie.daux@lsce.ipsl.fr	Daux, Valérie et al. “An Open-Access Database of Grape Harvest Dates for Climate Research: Data Description and Quality Assessment.” Climate of the Past 8 (2012): 1403–18.	x	https://www.ncdc.noaa.gov/paleo/study/13201
257	t	temperature	annual	AMJJAS	1799	1879	81			Les Riceys	France	Europe	6		47.98	4.28					0		Series published in recent literature, French books, French-language journals; Unpublished series collected from public organizations and services (Towns Archives, Chambers of Agriculture, Direction Departementale de l'Agriculture et de la Forêt, Meteo France, private winegrowers	Towns Archives, Chambers of Agriculture, Direction Departementale de l'Agriculture et de la Forêt, Meteo France	plant phenology record	GHD from Champagne 2	grape harvest date (GHD) series	grape harvest date (GHD) series	Indirect organic	yes	ts	valerie.daux@lsce.ipsl.fr	Daux, Valérie et al. “An Open-Access Database of Grape Harvest Dates for Climate Research: Data Description and Quality Assessment.” Climate of the Past 8 (2012): 1403–18.	x	https://www.ncdc.noaa.gov/paleo/study/13202
258	t	temperature	annual	AMJJAS	1483	1789	307			Gaillac- South-West	France	Europe	6		43.9	1.9					0		Series published in recent literature, French books, French-language journals; Unpublished series collected from public organizations and services (Towns Archives, Chambers of Agriculture, Direction Departementale de l'Agriculture et de la Forêt, Meteo France, private winegrowers	Towns Archives, Chambers of Agriculture, Direction Departementale de l'Agriculture et de la Forêt, Meteo France	plant phenology record	GHD from Gaillac- South-West	grape harvest date (GHD) series	grape harvest date (GHD) series	Indirect organic	yes	ts	valerie.daux@lsce.ipsl.fr	Daux, Valérie et al. “An Open-Access Database of Grape Harvest Dates for Climate Research: Data Description and Quality Assessment.” Climate of the Past 8 (2012): 1403–18.	x	https://www.ncdc.noaa.gov/paleo/study/13203
259	t	temperature	annual	AMJJAS	1611	1830	220			Stuttgart	Germany	Europe	6		48.77	9.17					0		Series published in recent literature, French books, French-language journals; Unpublished series collected from public organizations and services (Towns Archives, Chambers of Agriculture, Direction Departementale de l'Agriculture et de la Forêt, Meteo France, private winegrowers	Towns Archives, Chambers of Agriculture, Direction Departementale de l'Agriculture et de la Forêt, Meteo France	plant phenology record	GHD from Germany	grape harvest date (GHD) series	grape harvest date (GHD) series	Indirect organic	yes	ts	valerie.daux@lsce.ipsl.fr	Daux, Valérie et al. “An Open-Access Database of Grape Harvest Dates for Climate Research: Data Description and Quality Assessment.” Climate of the Past 8 (2012): 1403–18.	x	https://www.ncdc.noaa.gov/paleo/study/13204
260	t	temperature	annual	AMJJAS	1600	1879	280			High Loire Valley	France	Europe	6		47.07	2					0		Series published in recent literature, French books, French-language journals; Unpublished series collected from public organizations and services (Towns Archives, Chambers of Agriculture, Direction Departementale de l'Agriculture et de la Forêt, Meteo France, private winegrowers	Towns Archives, Chambers of Agriculture, Direction Departementale de l'Agriculture et de la Forêt, Meteo France	plant phenology record	GHD from High Loire Valley	grape harvest date (GHD) series	grape harvest date (GHD) series	Indirect organic	yes	ts	valerie.daux@lsce.ipsl.fr	Daux, Valérie et al. “An Open-Access Database of Grape Harvest Dates for Climate Research: Data Description and Quality Assessment.” Climate of the Past 8 (2012): 1403–18.	x	https://www.ncdc.noaa.gov/paleo/study/13205
261	t	temperature	annual	AMJJAS	1478	1977	500			Argenteuil	France	Europe	6		48.93	2.23					0		Series published in recent literature, French books, French-language journals; Unpublished series collected from public organizations and services (Towns Archives, Chambers of Agriculture, Direction Departementale de l'Agriculture et de la Forêt, Meteo France, private winegrowers	Towns Archives, Chambers of Agriculture, Direction Departementale de l'Agriculture et de la Forêt, Meteo France	plant phenology record	GHD from Ile de France	grape harvest date (GHD) series	grape harvest date (GHD) series	Indirect organic	yes	ts	valerie.daux@lsce.ipsl.fr	Daux, Valérie et al. “An Open-Access Database of Grape Harvest Dates for Climate Research: Data Description and Quality Assessment.” Climate of the Past 8 (2012): 1403–18.	x	https://www.ncdc.noaa.gov/paleo/study/13206
262	t	temperature	annual	AMJJAS	1449	1976	528			Salins	Swityerland	Europe	6		46.93	5.88					0		Series published in recent literature, French books, French-language journals; Unpublished series collected from public organizations and services (Towns Archives, Chambers of Agriculture, Direction Departementale de l'Agriculture et de la Forêt, Meteo France, private winegrowers	Towns Archives, Chambers of Agriculture, Direction Departementale de l'Agriculture et de la Forêt, Meteo France	plant phenology record	GHD from Jura	grape harvest date (GHD) series	grape harvest date (GHD) series	Indirect organic	yes	ts	valerie.daux@lsce.ipsl.fr	Daux, Valérie et al. “An Open-Access Database of Grape Harvest Dates for Climate Research: Data Description and Quality Assessment.” Climate of the Past 8 (2012): 1403–18.	x	https://www.ncdc.noaa.gov/paleo/study/13207
263	t	temperature	annual	AMJJAS	1524	2007	484			Montpellier	France	Europe	6		43.6	3.87					0		Series published in recent literature, French books, French-language journals; Unpublished series collected from public organizations and services (Towns Archives, Chambers of Agriculture, Direction Departementale de l'Agriculture et de la Forêt, Meteo France, private winegrowers	Towns Archives, Chambers of Agriculture, Direction Departementale de l'Agriculture et de la Forêt, Meteo France	plant phenology record	GHD from Languedoc	grape harvest date (GHD) series	grape harvest date (GHD) series	Indirect organic	yes	ts	valerie.daux@lsce.ipsl.fr	Daux, Valérie et al. “An Open-Access Database of Grape Harvest Dates for Climate Research: Data Description and Quality Assessment.” Climate of the Past 8 (2012): 1403–18.	x	https://www.ncdc.noaa.gov/paleo/study/13208
264	t	temperature	annual	AMJJAS	1801	2006	206			Chinon	France	Europe	6		47.15	0.22					0		Series published in recent literature, French books, French-language journals; Unpublished series collected from public organizations and services (Towns Archives, Chambers of Agriculture, Direction Departementale de l'Agriculture et de la Forêt, Meteo France, private winegrowers	Towns Archives, Chambers of Agriculture, Direction Departementale de l'Agriculture et de la Forêt, Meteo France	plant phenology record	GHD from Low Loire Valley	grape harvest date (GHD) series	grape harvest date (GHD) series	Indirect organic	yes	ts	valerie.daux@lsce.ipsl.fr	Daux, Valérie et al. “An Open-Access Database of Grape Harvest Dates for Climate Research: Data Description and Quality Assessment.” Climate of the Past 8 (2012): 1403–18.	x	https://www.ncdc.noaa.gov/paleo/study/13209
265	t	temperature	annual	AMJJAS	1840	1949	110			Grand Duché	Luxembourg	Europe	6		49.67	6.13					0		Series published in recent literature, French books, French-language journals; Unpublished series collected from public organizations and services (Towns Archives, Chambers of Agriculture, Direction Departementale de l'Agriculture et de la Forêt, Meteo France, private winegrowers	Towns Archives, Chambers of Agriculture, Direction Departementale de l'Agriculture et de la Forêt, Meteo France	plant phenology record	GHD from Luxembourg	grape harvest date (GHD) series	grape harvest date (GHD) series	Indirect organic	yes	ts	valerie.daux@lsce.ipsl.fr	Daux, Valérie et al. “An Open-Access Database of Grape Harvest Dates for Climate Research: Data Description and Quality Assessment.” Climate of the Past 8 (2012): 1403–18.	x	https://www.ncdc.noaa.gov/paleo/study/13210
266	t	temperature	annual	AMJJAS	1500	1796	297			Maritime alps	France	Europe	6		43.5	6					0		Series published in recent literature, French books, French-language journals; Unpublished series collected from public organizations and services (Towns Archives, Chambers of Agriculture, Direction Departementale de l'Agriculture et de la Forêt, Meteo France, private winegrowers	Towns Archives, Chambers of Agriculture, Direction Departementale de l'Agriculture et de la Forêt, Meteo France	plant phenology record	GHD from Maritime alps	grape harvest date (GHD) series	grape harvest date (GHD) series	Indirect organic	yes	ts	valerie.daux@lsce.ipsl.fr	Daux, Valérie et al. “An Open-Access Database of Grape Harvest Dates for Climate Research: Data Description and Quality Assessment.” Climate of the Past 8 (2012): 1403–18.	x	https://www.ncdc.noaa.gov/paleo/study/13211
267	t	temperature	annual	AMJJAS	1623	1884	262			Tirano	Italz	Europe	6		46.22	10.17					0		Series published in recent literature, French books, French-language journals; Unpublished series collected from public organizations and services (Towns Archives, Chambers of Agriculture, Direction Departementale de l'Agriculture et de la Forêt, Meteo France, private winegrowers	Towns Archives, Chambers of Agriculture, Direction Departementale de l'Agriculture et de la Forêt, Meteo France	plant phenology record	GHD from Northern Italy	grape harvest date (GHD) series	grape harvest date (GHD) series	Indirect organic	yes	ts	valerie.daux@lsce.ipsl.fr	Daux, Valérie et al. “An Open-Access Database of Grape Harvest Dates for Climate Research: Data Description and Quality Assessment.” Climate of the Past 8 (2012): 1403–18.	x	https://www.ncdc.noaa.gov/paleo/study/13212
268	t	temperature	annual	AMJJAS	1752	1884	133			Toul	Italy	Europe	6		48.68	5.88					0		Series published in recent literature, French books, French-language journals; Unpublished series collected from public organizations and services (Towns Archives, Chambers of Agriculture, Direction Departementale de l'Agriculture et de la Forêt, Meteo France, private winegrowers	Towns Archives, Chambers of Agriculture, Direction Departementale de l'Agriculture et de la Forêt, Meteo France	plant phenology record	GHD from Northern Lorraine	grape harvest date (GHD) series	grape harvest date (GHD) series	Indirect organic	yes	ts	valerie.daux@lsce.ipsl.fr	Daux, Valérie et al. “An Open-Access Database of Grape Harvest Dates for Climate Research: Data Description and Quality Assessment.” Climate of the Past 8 (2012): 1403–18.	x	https://www.ncdc.noaa.gov/paleo/study/13213
269	t	temperature	annual	AMJJAS	1537	2006	470			Northern Rhône valley	Frace	Europe	6		45.48	4.83					0		Series published in recent literature, French books, French-language journals; Unpublished series collected from public organizations and services (Towns Archives, Chambers of Agriculture, Direction Departementale de l'Agriculture et de la Forêt, Meteo France, private winegrowers	Towns Archives, Chambers of Agriculture, Direction Departementale de l'Agriculture et de la Forêt, Meteo France	plant phenology record	GHD from Northern Rhône valley	grape harvest date (GHD) series	grape harvest date (GHD) series	Indirect organic	yes	ts	valerie.daux@lsce.ipsl.fr	Daux, Valérie et al. “An Open-Access Database of Grape Harvest Dates for Climate Research: Data Description and Quality Assessment.” Climate of the Past 8 (2012): 1403–18.	x	https://www.ncdc.noaa.gov/paleo/study/13214
270	t	temperature	annual	AMJJAS	1713	1879	167			Savoie	France	Europe	6		45.6	6					0		Series published in recent literature, French books, French-language journals; Unpublished series collected from public organizations and services (Towns Archives, Chambers of Agriculture, Direction Departementale de l'Agriculture et de la Forêt, Meteo France, private winegrowers	Towns Archives, Chambers of Agriculture, Direction Departementale de l'Agriculture et de la Forêt, Meteo France	plant phenology record	GHD from Savoie	grape harvest date (GHD) series	grape harvest date (GHD) series	Indirect organic	yes	ts	valerie.daux@lsce.ipsl.fr	Daux, Valérie et al. “An Open-Access Database of Grape Harvest Dates for Climate Research: Data Description and Quality Assessment.” Climate of the Past 8 (2012): 1403–18.	x	https://www.ncdc.noaa.gov/paleo/study/13215
271	t	temperature	annual	AMJJAS	1499	2007	509			Spain	Spain	Europe	6		42.34	-3.3					0		Series published in recent literature, French books, French-language journals; Unpublished series collected from public organizations and services (Towns Archives, Chambers of Agriculture, Direction Departementale de l'Agriculture et de la Forêt, Meteo France, private winegrowers	Towns Archives, Chambers of Agriculture, Direction Departementale de l'Agriculture et de la Forêt, Meteo France	plant phenology record	GHD from Spain	grape harvest date (GHD) series	grape harvest date (GHD) series	Indirect organic	yes	ts	valerie.daux@lsce.ipsl.fr	Daux, Valérie et al. “An Open-Access Database of Grape Harvest Dates for Climate Research: Data Description and Quality Assessment.” Climate of the Past 8 (2012): 1403–18.	x	https://www.ncdc.noaa.gov/paleo/study/13216
272	t	temperature	annual	AMJJAS	1760	1879	120			Châtillon-sur-Saône	France	Europe	6		47.98	5.88					0		Series published in recent literature, French books, French-language journals; Unpublished series collected from public organizations and services (Towns Archives, Chambers of Agriculture, Direction Departementale de l'Agriculture et de la Forêt, Meteo France, private winegrowers	Towns Archives, Chambers of Agriculture, Direction Departementale de l'Agriculture et de la Forêt, Meteo France	plant phenology record	GHD from Southern Lorraine	grape harvest date (GHD) series	grape harvest date (GHD) series	Indirect organic	yes	ts	valerie.daux@lsce.ipsl.fr	Daux, Valérie et al. “An Open-Access Database of Grape Harvest Dates for Climate Research: Data Description and Quality Assessment.” Climate of the Past 8 (2012): 1403–18.	x	https://www.ncdc.noaa.gov/paleo/study/13217
273	t	temperature	annual	AMJJAS	1433	2006	574			Pernes-les-Fontaines, Couvent des Pernes	France	Europe	6		43.98	5.05					0		Series published in recent literature, French books, French-language journals; Unpublished series collected from public organizations and services (Towns Archives, Chambers of Agriculture, Direction Departementale de l'Agriculture et de la Forêt, Meteo France, private winegrowers	Towns Archives, Chambers of Agriculture, Direction Departementale de l'Agriculture et de la Forêt, Meteo France	plant phenology record	GHD from Southern Rhône valley	grape harvest date (GHD) series	grape harvest date (GHD) series	Indirect organic	yes	ts	valerie.daux@lsce.ipsl.fr	Daux, Valérie et al. “An Open-Access Database of Grape Harvest Dates for Climate Research: Data Description and Quality Assessment.” Climate of the Past 8 (2012): 1403–18.	x	https://www.ncdc.noaa.gov/paleo/study/13218
274	t	temperature	annual	AMJJAS	1480	2007	528			Lausanne	Switzerland	Europe	6		46.57	6.52					0		Series published in recent literature, French books, French-language journals; Unpublished series collected from public organizations and services (Towns Archives, Chambers of Agriculture, Direction Departementale de l'Agriculture et de la Forêt, Meteo France, private winegrowers	Towns Archives, Chambers of Agriculture, Direction Departementale de l'Agriculture et de la Forêt, Meteo France	plant phenology record	GHD from Lausanne	grape harvest date (GHD) series	grape harvest date (GHD) series	Indirect organic	yes	ts	valerie.daux@lsce.ipsl.fr	Daux, Valérie et al. “An Open-Access Database of Grape Harvest Dates for Climate Research: Data Description and Quality Assessment.” Climate of the Past 8 (2012): 1403–18.	x	https://www.ncdc.noaa.gov/paleo/study/13219
275	t	temperature	annual	AMJJAS	1543	1933	391			Various South-East	Fraace	Europe	6		43.74	3.47					0		Series published in recent literature, French books, French-language journals; Unpublished series collected from public organizations and services (Towns Archives, Chambers of Agriculture, Direction Departementale de l'Agriculture et de la Forêt, Meteo France, private winegrowers	Towns Archives, Chambers of Agriculture, Direction Departementale de l'Agriculture et de la Forêt, Meteo France	plant phenology record	GHD from Various South-East	grape harvest date (GHD) series	grape harvest date (GHD) series	Indirect organic	yes	ts	valerie.daux@lsce.ipsl.fr	Daux, Valérie et al. “An Open-Access Database of Grape Harvest Dates for Climate Research: Data Description and Quality Assessment.” Climate of the Past 8 (2012): 1403–18.	x	https://www.ncdc.noaa.gov/paleo/study/13220
276	t	temperature	annual	AMJJAS	1600	1877	278			Saint-Hilaire-de-Talmont	France	Europe	6		46.45	-1.5					0		Series published in recent literature, French books, French-language journals; Unpublished series collected from public organizations and services (Towns Archives, Chambers of Agriculture, Direction Departementale de l'Agriculture et de la Forêt, Meteo France, private winegrowers	Towns Archives, Chambers of Agriculture, Direction Departementale de l'Agriculture et de la Forêt, Meteo France	plant phenology record	GHD from Vendée - Poitou Charente	grape harvest date (GHD) series	grape harvest date (GHD) series	Indirect organic	yes	ts	valerie.daux@lsce.ipsl.fr	Daux, Valérie et al. “An Open-Access Database of Grape Harvest Dates for Climate Research: Data Description and Quality Assessment.” Climate of the Past 8 (2012): 1403–18.	x	https://www.ncdc.noaa.gov/paleo/study/13221
277	t	temperature	annual	AMJJ	1354	2018	665			Baune	France	Europe	6	219	47.026	4.84					1	Beaune	Wage payment data (1354-1506); Meetings of the Notre Dame Church chapter (1507-1699); Deliberations of the city council (1700 to 1965); Newspaper reports (1966 to 2018)	archives municipales de Beaune, archives privées et orales, newspapers	plant phenology record	GHD from Baune	grape harvest date (GHD) series	grape harvest date (GHD) series	Indirect organic	yes	r	thomas.labbe@u-bourgogne.fr	Labbé, T., et al. "The longest homogeneous series of grape harvest dates, Beaune 1354–2018, and its significance for the understanding of past and present climate." Clim. Past, 15 (2019):1485–1501. Labbé, Thomas, and Fabien Gaveau. “Les dates de vendange à Beaune (1371–2010). Analyse et données d’une nouvelle série vendémiologique.” Revue historique 666 (2013): 333–67.	x	https://www.euroclimhist.unibe.ch/en
278	t	temperature	annual	AMJJ	1354	2018	665			Baune	France	Europe	6	219	47.026	4.84					1	Beaune	Wage payment data (1354-1506); Meetings of the Notre Dame Church chapter (1507-1699); Deliberations of the city council (1700 to 1965); Newspaper reports (1966 to 2018)	archives municipales de Beaune, archives privées et orales, newspapers	daily wage payments made to day-labourers; date of the last meeting before the vacation of the chapter who had to organize the harvest; opening date of the harvest; article reports the date when the vine-growers start the harvest in the town vineyard --> GHD	GHD from Baune	reconstructed April-July temperatures	temperature reconstruction	Indirect organic	yes	r	thomas.labbe@u-bourgogne.fr	Labbé, T., et al. "The longest homogeneous series of grape harvest dates, Beaune 1354–2018, and its significance for the understanding of past and present climate." Clim. Past, 15 (2019):1485–1501. Labbé, Thomas, and Fabien Gaveau. “Les dates de vendange à Beaune (1371–2010). Analyse et données d’une nouvelle série vendémiologique.” Revue historique 666 (2013): 333–67.	x	https://www.euroclimhist.unibe.ch/en
279	t	temperature	annual	DJF	1400	1500	101			Burgundian Low Countries	Belgium, Netherlands and Northern France	Europe	6				49	53	1.5	7	2	based on graph in paper	annals, chronicles, memoirs, journals, letters, weather diaries, travel reports, monastic records, town records, toll accounts, charters	not specified in paper	weather spells, climatic anomalies or weather-induced disasters, plant phenology		seven-point ordinal temperature index: -3/3 = extremely cold, very cold, cold, normal, warm, very warm, extremely warm	temperature index	direct observed	yes	i	chantal.camenisch@hist.unibe.ch	Camenisch, Chantal. “Endless Cold: A Seasonal Reconstruction of Temperature and Precipitation in the Burgundian Low Countries during the 15th Century Based on Documentary Evidence.” Climate of the Past 11 (2015a): 1049–66.	x	will be published in Documentary Proxy Dataset, for now contact angela-maria.burgdorf@giub.unibe.ch
280	t	temperature	annual	MAM	1400	1500	101			Burgundian Low Countries	Belgium, Netherlands and Northern France	Europe	6				49	53	1.5	7	2	based on graph in paper	annals, chronicles, memoirs, journals, letters, weather diaries, travel reports, monastic records, town records, toll accounts, charters	not specified in paper	weather spells, climatic anomalies or weather-induced disasters, plant phenology		seven-point ordinal temperature index: -3/3 = extremely cold, very cold, cold, normal, warm, very warm, extremely warm	temperature index	direct observed	yes	i	chantal.camenisch@hist.unibe.ch	Camenisch, Chantal. “Endless Cold: A Seasonal Reconstruction of Temperature and Precipitation in the Burgundian Low Countries during the 15th Century Based on Documentary Evidence.” Climate of the Past 11 (2015a): 1049–66.	x	will be published in Documentary Proxy Dataset, for now contact angela-maria.burgdorf@giub.unibe.ch
281	t	temperature	annual	JJA	1400	1500	101			Burgundian Low Countries	Belgium, Netherlands and Northern France	Europe	6				49	53	1.5	7	2	based on graph in paper	annals, chronicles, memoirs, journals, letters, weather diaries, travel reports, monastic records, town records, toll accounts, charters	not specified in paper	weather spells, climatic anomalies or weather-induced disasters, plant phenology		seven-point ordinal temperature index: -3/3 = extremely cold, very cold, cold, normal, warm, very warm, extremely warm	temperature index	direct observed	yes	i	chantal.camenisch@hist.unibe.ch	Camenisch, Chantal. “Endless Cold: A Seasonal Reconstruction of Temperature and Precipitation in the Burgundian Low Countries during the 15th Century Based on Documentary Evidence.” Climate of the Past 11 (2015a): 1049–66.	x	will be published in Documentary Proxy Dataset, for now contact angela-maria.burgdorf@giub.unibe.ch
282	t	temperature	annual	SON	1400	1500	101			Burgundian Low Countries	Belgium, Netherlands and Northern France	Europe	6				49	53	1.5	7	2	based on graph in paper	annals, chronicles, memoirs, journals, letters, weather diaries, travel reports, monastic records, town records, toll accounts, charters	not specified in paper	weather spells, climatic anomalies or weather-induced disasters, plant phenology		seven-point ordinal temperature index: -3/3 = extremely cold, very cold, cold, normal, warm, very warm, extremely warm	temperature index	direct observed	yes	i	chantal.camenisch@hist.unibe.ch	Camenisch, Chantal. “Endless Cold: A Seasonal Reconstruction of Temperature and Precipitation in the Burgundian Low Countries during the 15th Century Based on Documentary Evidence.” Climate of the Past 11 (2015a): 1049–66.	x	will be published in Documentary Proxy Dataset, for now contact angela-maria.burgdorf@giub.unibe.ch
283	p	precipitation	annual	DJF	1400	1500	101			Burgundian Low Countries	Belgium, Netherlands and Northern France	Europe	6				49	53	1.5	7	2	based on graph in paper	annals, chronicles, memoirs, journals, letters, weather diaries, travel reports, monastic records, town records, toll accounts, charters	not specified in paper	weather spells, climatic anomalies or weather-induced disasters, plant phenology		seven-point ordinal precipitation index: -3/3 = extremely dry, very dry, dry, normal, wet, very wet, extremely wet	precipitation index	direct observed	yes	i	chantal.camenisch@hist.unibe.ch	Camenisch, Chantal. “Endless Cold: A Seasonal Reconstruction of Temperature and Precipitation in the Burgundian Low Countries during the 15th Century Based on Documentary Evidence.” Climate of the Past 11 (2015a): 1049–66.	x	will be published in Documentary Proxy Dataset, for now contact angela-maria.burgdorf@giub.unibe.ch
284	p	precipitation	annual	MAM	1400	1500	101			Burgundian Low Countries	Belgium, Netherlands and Northern France	Europe	6				49	53	1.5	7	2	based on graph in paper	annals, chronicles, memoirs, journals, letters, weather diaries, travel reports, monastic records, town records, toll accounts, charters	not specified in paper	weather spells, climatic anomalies or weather-induced disasters, plant phenology		seven-point ordinal precipitation index: -3/3 = extremely dry, very dry, dry, normal, wet, very wet, extremely wet	precipitation index	direct observed	yes	i	chantal.camenisch@hist.unibe.ch	Camenisch, Chantal. “Endless Cold: A Seasonal Reconstruction of Temperature and Precipitation in the Burgundian Low Countries during the 15th Century Based on Documentary Evidence.” Climate of the Past 11 (2015a): 1049–66.	x	will be published in Documentary Proxy Dataset, for now contact angela-maria.burgdorf@giub.unibe.ch
285	p	precipitation	annual	JJA	1400	1500	101			Burgundian Low Countries	Belgium, Netherlands and Northern France	Europe	6				49	53	1.5	7	2	based on graph in paper	annals, chronicles, memoirs, journals, letters, weather diaries, travel reports, monastic records, town records, toll accounts, charters	not specified in paper	weather spells, climatic anomalies or weather-induced disasters, plant phenology		seven-point ordinal precipitation index: -3/3 = extremely dry, very dry, dry, normal, wet, very wet, extremely wet	precipitation index	direct observed	yes	i	chantal.camenisch@hist.unibe.ch	Camenisch, Chantal. “Endless Cold: A Seasonal Reconstruction of Temperature and Precipitation in the Burgundian Low Countries during the 15th Century Based on Documentary Evidence.” Climate of the Past 11 (2015a): 1049–66.	x	will be published in Documentary Proxy Dataset, for now contact angela-maria.burgdorf@giub.unibe.ch
286	p	precipitation	annual	SON	1400	1500	101			Burgundian Low Countries	Belgium, Netherlands and Northern France	Europe	6				49	53	1.5	7	2	based on graph in paper	annals, chronicles, memoirs, journals, letters, weather diaries, travel reports, monastic records, town records, toll accounts, charters	not specified in paper	weather spells, climatic anomalies or weather-induced disasters, plant phenology		seven-point ordinal precipitation index: -3/3 = extremely dry, very dry, dry, normal, wet, very wet, extremely wet	precipitation index	direct observed	yes	i	chantal.camenisch@hist.unibe.ch	Camenisch, Chantal. “Endless Cold: A Seasonal Reconstruction of Temperature and Precipitation in the Burgundian Low Countries during the 15th Century Based on Documentary Evidence.” Climate of the Past 11 (2015a): 1049–66.	x	will be published in Documentary Proxy Dataset, for now contact angela-maria.burgdorf@giub.unibe.ch
287	t	temperature	annual	MAMJJ	1454	1970	517			Switzerland and southwestern Germany	Belgium, Netherlands and Northern France	Europe	6				47	48.5	7	10	2	based on graph in paper	harvest related book-keeping of institutions (hospitals, municipalities); (early) phenological observations	Spitalarchiv F12 Staatsarchiv Basel-Stadt; Burgerbibliothek Bern; Zentralbibliothek Zürich; Stadtbibliothek Winterthur; Stiftsarchiv Einsiedeln; Klosterarchiv Mariastein...	Wage payment dates (WPD); Tithe auction data (TAD); Historic phenological data (HPD); Phenological network observations (PNO)	winter grain harvest starting dates (WGHD)		winter grain harvest date (WGHD) series	Indirect organic	yes	r	oliver.wetter@hist.unibe.ch	Wetter, Oliver, and Christian Pfister. “Spring-Summer Temperatures Reconstructed for Northern Switzerland and Southwestern Germany from Winter Rye Harvest Dates, 1454–1970.” Climate of the Past 7 (2011): 1307–26.	x	https://www.ncei.noaa.gov/pub/data/paleo/historical/europe/switzerland/swiss-summer-temp2011.txt
288	t	temperature	annual	MAMJJ	1454	1970	517			Switzerland and southwestern Germany	Belgium, Netherlands and Northern France	Europe	6				47	48.5	7	10	2	based on graph in paper	harvest related book-keeping of institutions (hospitals, municipalities); (early) phenological observations	Spitalarchiv F12 Staatsarchiv Basel-Stadt; Burgerbibliothek Bern; Zentralbibliothek Zürich; Stadtbibliothek Winterthur; Stiftsarchiv Einsiedeln; Klosterarchiv Mariastein...	Wage payment dates (WPD); Tithe auction data (TAD); Historic phenological data (HPD); Phenological network observations (PNO)	winter grain harvest starting dates (WGHD)	Reconstructed March-July temperatures	temperature reconstruction	Indirect organic	yes	r	oliver.wetter@hist.unibe.ch	Wetter, Oliver, and Christian Pfister. “Spring-Summer Temperatures Reconstructed for Northern Switzerland and Southwestern Germany from Winter Rye Harvest Dates, 1454–1970.” Climate of the Past 7 (2011): 1307–26.	x	https://www.ncei.noaa.gov/pub/data/paleo/historical/europe/switzerland/swiss-summer-temp2011.txt
289	t	temperature	annual	AMJJ	1444	2011	568			Switzerland and southwestern Germany	Belgium, Netherlands and Northern France	Europe	6				46.4953	47.6968	6.3918	9.23334	2	based on graph in paper (Aubonne,Hallau, Murg)	harvest related book-keeping of institutions (hospitals, municipalities); (early) phenological observations	State Archive of Basel	Wage payment dates (WPD) hospital basel; Tithe auction data (TAD); Historic phenological data (HPD); Phenological network observations (PNO)	grape harvest starting dates (GHD)		grape harvest date (GHD) series	Indirect organic	yes	r	oliver.wetter@hist.unibe.ch	Wetter, Oliver, and Christian Pfister. “An underestimated record breaking event – why summer 1540 was likely warmer than 2003” Climate of the Past 9 (2013): 41–56.	x	https://www.ncei.noaa.gov/pub/data/paleo/historical/europe/switzerland/swiss-summer-temp2013.txt
290	t	temperature	annual	AMJJ	1444	2011	568			Switzerland and southwestern Germany	Belgium, Netherlands and Northern France	Europe	6				46.4953	47.6968	6.3918	9.23334	2	based on graph in paper (Aubonne,Hallau, Murg)	harvest related book-keeping of institutions (hospitals, municipalities); (early) phenological observations	State Archive of Basel	Wage payment dates (WPD) hospital basel; Tithe auction data (TAD); Historic phenological data (HPD); Phenological network observations (PNO)	grape harvest starting dates (GHD)	Reconstructed April-July temperatures	temperature reconstruction	Indirect organic	yes	r	oliver.wetter@hist.unibe.ch	Wetter, Oliver, and Christian Pfister. “An underestimated record breaking event – why summer 1540 was likely warmer than 2003” Climate of the Past 9 (2013): 41–56.	x	https://www.ncei.noaa.gov/pub/data/paleo/historical/europe/switzerland/swiss-summer-temp2013.txt
291	t	temperature	annual		853	1963	1111			Venice	Italy	Europe	6		45.4408	12.3155					1	Venice	original sources in Latin, Venetian, and Italian (See appendix of paper)	many libraries (e.g. Marciana National Library), museums and private collections in Venice as well as abroad	records on freezing of the Lagoon and the internal canals	records on freezing of the Lagoon and the internal canals	catalog of freezing of the venetian lagoon: 5 categories = 1 severe winters without freezing, 2 partial freezing of the edges of the Lagoon, 3 ice on the internal canals, 4 generic news about exceptional freezing, 5 freezing of Lagoon with ice supporting people	ice freeze up catalog	direct observed	yes	e	d.camuffo@isac.cnr.it	Camuffo, Dario. “Freezing of the Venetian Lagoon Since the 9th Century AD in Comparison to the Climate of Western Europe and England.” Climatic Change 10 (1987): 43–66.
292	p	precipitation	annual		1500	2000	501			Europe	Europe	Europe	6				36	54	-6	25	2	based on graph in paper	town chronicles, weather diaries, annals, newspapers, flood marks	not specified in paper	flooding records of twelve Central European rivers and for eight Mediterranean rivers; flood reconstruction based on intensity-classification of historical floods (Sturm et al. 2001)	flooding records of twelve Central European rivers and for eight Mediterranean rivers; flood reconstruction based on intensity-classification of historical floods (Sturm et al. 2001)	Long-term series of flood events with respect to the underlying climatological cause	flood frequency	direct observed, measured	yes	ts	ruediger.glaser@geographie.uni-freiburg.de	Glaser, Rüdiger et al. “The Variability of European Floods Since AD 1500.” Climatic Change 101 (2010): 235–56.
293	t	temperature	decadal	ONDJFMAMJ	1561	1800	240			Iceland	Iceland	Europe	6		64.9631	-19.0208					1	Iceland	Annals, Private and official correspondence, Descriptions of Iceland by Icelanders, The fon fonssons' weather diary from Eyjafjord	Pjoskjalasafn (National Archives), Reykjavik; Landsbokasafn (National Library), Reykjavik	movements and duration of the sea ice, weather descriptions, extremes, livestock...	decadal winter/spring thermal index	decadal winter/spring thermal index 1561-1580 and 1601-1800: -1/1 = very cold, normal, mild	temperature index	direct observed	yes	i	astrid.ogilvie@colorado.edu	Ogilvie, Astrid E.J. “Documentary Evidence for Changes in the Climate of Iceland, A.D. 1500 to 1800.” In Climate Since A.D. 1500, edited by R.S. Bradley and P.D. Jones, 92–117. London: Routledge, 1995.	*	graph in book chapter
294	t	temperature	decadal		1561	1800	240			Iceland	Iceland	Europe	6		64.9631	-19.0208					1	Iceland	Annals, Private and official correspondence, Descriptions of Iceland by Icelanders, The fon fonssons' weather diary from Eyjafjord	Pjoskjalasafn (National Archives), Reykjavik; Landsbokasafn (National Library), Reykjavik	movements and duration of the sea ice, weather descriptions, extremes, livestock...	decadal sea ice index	decadal sea ice index 1561-1580 and 1601-1800: value 1 is awarded if a region documented sea ice; max number per year 4, 40 per decade)	sea ice index	direct observed	yes	i	astrid.ogilvie@colorado.edu	Ogilvie, Astrid E.J. “Documentary Evidence for Changes in the Climate of Iceland, A.D. 1500 to 1800.” In Climate Since A.D. 1500, edited by R.S. Bradley and P.D. Jones, 92–117. London: Routledge, 1995.
295	w	wind	annual		1500	1991	492			Scotland	Scotland	Europe	6		56.4907	4.2026					1	Scotland	historical data of coastal areas especially port towns, and compilations of extreme weather events undertaken in previous and current research and in newspapers	manorial, legal, ecclesiastical, and administrative archives	records of coastal flooding, erosion and sand movements and their associated impacts	Chronologies of coastal flooding		coastal flood frequency	direct observed	yes	ts	kieran.hickey@nuigalway.ie	Hickey, Kieran Richard. "Documentary records of coastal storms in Scotland 1500-1991 A.D. Volume 1." Unpublished Thesis. Coventry, UK: Coventry University, 1997.
296	w	wind	monthly		1685	1851	167	1850	2008	English Channel	English Channel	Europe	6				48	52	-10	5	0		Royal Navy ships’ logbooks	National Maritime Museum at Greenwich (South East London) and the UK National Archives (Kew, Surrey)	57'817 daily wind records (strength and direction) of precise location of ships; marine meteorological datasets (1850-2008)	daily wind records	proportion of days per month (in %) with prevailing wind from the west	westwind index	direct observed, measured	no	i	dbarriop@fis.ucm.es	Barriopedro, David et al. “Witnessing North Atlantic Westerlies Variability from Ships’ Logbooks (1685–2008).” Climate Dynamics 43 (2014): 939–55.	x	https://www.upo.es/vareclim/Data/WI.txt
297	t	temperature	annual	DJF	1500	1995	496			Western Baltic	Western Baltic	Europe	6				54	56	9	15	2	based on graph in paper	Journal notes, 'Segel-Handbuch für die Ostsee' (Hydrographisches Amt der Kaiserlichen Marine, 1878), 'Eysbuch' (river chronicle), records from the minutes of sessions of the Hamburg Senate, newspaper reports, other chronicles, Historische Klimadatenbank Deutschland (HISKLID)	regional archives (Bremen, Hamburg, Lübeck, Wismar, Rostock, Stralsund, Greifswald, incorporated in the Historische Klimadatenbank Deutschland (Historical Climatic Data Bank Germany, HISKLID), Speerschneider's compilation	Finnish Institute of Marine Research constructed the early part of the time series using many different types of data sources to estimate the severity of the winter and thus the ice extent; Later on the Finnish Ice Service: on the basis of regular observations of different types. Today: remote sensing observations	Western Baltic sea ice index	ice winter severity index numerals: Extreme =3, Very strong =2, Strong+ =1,Strong- =0.5, Moderate+ = 0.3, Moderate- =0.1, Weak =0	ice severity index	indirect inorganic	yes	i	ruediger.glaser@geographie.uni-freiburg.de	Koslowski, Gerhard and Glaser, Rüdiger. "Variations in reconstructed ice winter severity in the Western Baltic from 1501 to 1995, and their implications for the North Atlantic oscillation." Climatic Change 41 (1999): 175-191. Koslowski, Gerhard and Glaser, Rüdiger. "Reconstruction of the ice winter severity since 1701 in the Western Baltic." Climatic Change 31 (1995): 79-98.	x	will be published in Documentary Proxy Dataset, for now contact angela-maria.burgdorf@giub.unibe.ch	not mentioned what is meant by "winter", DJF assumed
298	t	temperature	annual	DJFM	1529	1990	462			Riga	northern Baltic Sea	Europe	6		56.9496	24.1052					1	Riga	historical chronicles, port journals, custom books, town council minutes and trade company records; first ts by Stakle (1936), updated by Betin (1957), updated to present day: yearbooks in the library of the Estonian Meteorological and Hydrological Institute;	Estonian Meteorological and Hydrological Institute (EMHI) archives	date of the first freezing, the date of formation and end of permanent ice cover, the final disappearance of ice, number of days with ice, ice thickness and air temperature	date of the first freezing, the date of formation and end of permanent ice cover, the final disappearance of ice, number of days with ice, ice thickness and air temperature	historical time series of ice break-up at the port of Riga	ice break up series	indirect inorganic	yes	ts	sveta.jevrejeva@neti.ee	Jevrejeva, Sveta. “Severity of Winter Seasons in the Northern Baltic Sea Between 1529 and 1990: Reconstruction and Analysis.” Climate Research 17 (2001): 55-62. Stakle, P. "Die Eisverhältnisse der Ostsee und ihre Erforschung. Sitzungsberichte der finnischen Acadamie der Wissenschaften", Helsinki, 1936. Betin ,V.V. "Ice conditions in different parts of the Baltic Sea and their variations. State Oc…
299	t	temperature	annual	boreal winter	1720	2000	281		2018	northern Baltic Sea	northern Baltic Sea	Europe	6				53	66	10	30	2	based on graph in paper	different types of data sources (paper not available for exact information)	not specified in paper	ice phenology record		Finnish Institute of Marine Research constructed the early part of the time series using many different types of data sources to estimate the severity of the winter and thus the ice extent. Later on the Finnish Ice Service: on the basis of regular observations of different types. Today: remote sensing observations	maximum annual ice extent	indirect inorganic, direct observed	yes	ts	jouni.vainio@fmi.fi	Seinä Ari and Palosuo E. "The classification of the maximum annual extent of ice cover in the Baltic Sea 1720–1995." MERI-Report Series of the Finnish Inst of Marine Res 27 (1996): 79–91; Seinä, Ari et al."Ice seasons 1996–2000 in Finnish sea areas." MERI-Report Series of the Finnish Inst of Marine Res 43 (2001):132. papers not available but some information here: Alenius, Pekka et al. "Sea ice a…	x	https://www.eea.europa.eu/data-and-maps/daviz/maximum-extent-of-ice-cover-3#tab-chart_1
300	t	temperature	annual	FMAMJ	1750	1924	175			southern Finnland	Finnland	Europe	6				60	63	19	29	2	based on graph in paper	phenological reports	not specified in paper	plant phenology record	information from fragmentary, partly overlapping, partly non-systematically biased plant phenological records of 14 different phenomena (a total of 3,144 observations): records compiled into one dataset by Linkola (1924)	mean phenological index: computed as an average of all available phenomenon-specific index series; proxy for Feb-June temperature	phenological index	indirect organic	yes	i	jari.holopainen@uef.fi	Holopainen, Jari et al. "Plant phenological data and tree-rings as palaeoclimate indicators since AD 1750 in SW Finland." International Journal of Biometeorology 51 (2006): 61-72.	x	will be published in Documentary Proxy Dataset, for now contact angela-maria.burgdorf@giub.unibe.ch
301	t	temperature	annual	AMJJ	1750	1875	126			Finnland	Finnland	Europe	6				59.87	69.85	19.55	30.9	0		phenological reports	digitized from books: Moberg, 1857, Moberg, 1860, Moberg, 1885, Moberg, 1894	plant phenology record	notes on phenological phases (e.g. budburst, flowering): the year, month, and the day of the month, as well as the site name and its geographical coordinates; mean phenological record correlates negatively and strongly significant with April-July temperatures.	catalog of phenological phases; proxy for April-June temperature	phenological time series	Indirect organic	yes	ts	jari.holopainen@uef.fi	Holopainen, Jari et al. "Digitizing the plant phenological dataset (1750-1875) from collections of Professor Adolf Moberg: Towards the development of historical climate records." Agricultural and Forest Meteorology 253-254 (2018):141-150.	x	https://www.ncdc.noaa.gov/paleo-search/study/23610
302	t	temperature	annual	AM	1693	2011	319	1860	2011	Tornio	Finnland	Europe	6	6	65.85	24.16					0		personal journals, newspapers, gaming accounts and government monitoring records	not specified in paper	record of ice break-up on the Tornio river at Tornio/Haparanda: compared to Haparanda instrumental record 1860–2011; early instrumental record 1802–1858	ice break up of Tornio River	ice break-up series of Tornio river	ice break up series	indirect inorganic	yes	ts	N.J.Loader@swansea.ac.uk	Loader, Neil J. et al. "Spring temperature variability in northern Fennoscandia AD 1693-2011." Journal of Quaternary Science 26 (2011): 566-570; Kajander, Juha. "Methodological Aspects on River Cryophenology Exemplified by a Tricentennial Break-up Time Series from Tornio." Geophysica 29 (1993): 73-95.	x	https://nsidc.org/data/lake_river_ice/freezethaw.html
303	t	temperature	annual	AM	1693	2011	319	1860	2011	Tornio	Finnland	Europe	6	6	65.85	24.16					0		personal journals, newspapers, gaming accounts and government monitoring records	not specified in paper	record of ice break-up on the Tornio river at Tornio/Haparanda: compared to Haparanda instrumental record 1860–2011; early instrumental record 1802–1858	ice break up of Tornio River	April-Mai temperature reconstruction	temperature reconstruction	indirect inorganic	yes	r	N.J.Loader@swansea.ac.uk	Loader, Neil J. et al. "Spring temperature variability in northern Fennoscandia AD 1693-2011." Journal of Quaternary Science 26 (2011): 566-570; Kajander, Juha. "Methodological Aspects on River Cryophenology Exemplified by a Tricentennial Break-up Time Series from Tornio." Geophysica 29 (1993): 73-95.	x	https://www.ncdc.noaa.gov/paleo-search/study/11927
304	t	temperature	annual		1749	2018	270			Turku	Finnland	Europe	6		60.75	22.45					0		Newspapers, Harbour diaries and statistical records, Personal records	National Archives in Stockholm, Sweden; National Archives in Helsinki, Finnland; archive collections at Åbo Akademi University;	ice phenology record	ice break up of Aura River	ice break-up date of Aura river	ice break up series	indirect inorganic	yes	ts	stnorrga@abo.fi	Norrgård, Stefan and Helama, Samuli "Historical trends in spring ice breakup for the Aura River in Southwest Finland, AD 1749–2018." The Holocene (2019): 1-11.
305	t	temperature	annual	FMA	1758	1874	117	1875	2006	Jonsrud	Norway	Europe	6		60.3713	10.4247					0		farm diaries; Ice maps of lake Randsfjord; Ship observations from lake Mjøsa;	archive of Norwegian Water Resources and Energy Directorate (NVE) and others (not specifically mentioned)	start and end dates of the ice break-up; ice break-up index for Lake Randsfjord (IBR)	ice break up of Lake Randsfjord	number of days counted from 1 January to the day of the ice break-up	ice break up series	indirect inorganic	yes	ts	oyvind.nordli@met.no	Nordli, Øyvind et al. “A Late-Winter to Early-Spring Temperature Reconstruction for Southeastern Norway from 1758 to 2006.” Annals of Glaciology 46 (2007): 404–08.	x	will be published in Documentary Proxy Dataset, for now contact angela-maria.burgdorf@giub.unibe.ch
306	t	temperature	annual	FMA	1758	1874	117	1875	2006	Jonsrud	Norway	Europe	6		60.3713	10.4247					0		farm diaries; Ice maps of lake Randsfjord; Ship observations from lake Mjøsa;	archive of Norwegian Water Resources and Energy Directorate (NVE) and others (not specifically mentioned)	start and end dates of the ice break-up; ice break-up index for Lake Randsfjord (IBR)	ice break up of Lake Randsfjord	reconstructed February-April temperatures	temperature reconstruction	indirect inorganic	yes	r	oyvind.nordli@met.no	Nordli, Øyvind et al. “A Late-Winter to Early-Spring Temperature Reconstruction for Southeastern Norway from 1758 to 2006.” Annals of Glaciology 46 (2007): 404–08.	x	will be published in Documentary Proxy Dataset, for now contact angela-maria.burgdorf@giub.unibe.ch
307	t	temperature	annual	JFMA	1712	1892	181			Stockholm	Sweden	Europe	6	75	59.15	18					0		administrative records related to shipping and harbour activities: Custom ledgers, Weigh books, Short administrative series, Freight books, Harbour fee, Pole penny, Drafts of Sjöpass “Sea Passports”, Planks granted for ballast, Ice break-up, Official port statistics, Ship record, Descriptive sources	The National Archive of Sweden; The City archive of Stockholm; The National Board of Trade, Huvudarkivet, (Main archive); The Chancellor’s archive, Stockholms	date of the start of the sailing season; quantitative reconstruction (QUAN): time series of dates, regarded as proxies for winter/spring temperatures; qualitative index series (QUAL): Descriptive climate information from all sources: seven-point ordinal classification	ice break up of Stockholm harbour	compillation of when ship freights started from Västerås. Hildebrandtsson (1915)	ice break up series	direct observed, indirect organic	yes	ts	Lotta.Leijonhufvud@natgeo.su.se	Leijonhufvud, Lotta et al. “Five Centuries of Stockholm Winter/Spring Temperatures Reconstructed from Documentary Evidence and Instrumental Observations.” Climatic Change 101 (2010): 109–41.	x	https://www.ncdc.noaa.gov/paleo-search/study/10429
308	t	temperature	annual	JFMA	1533	1664	132			Stockholm	Sweden	Europe	6	75	59.15	18					0		administrative records related to shipping and harbour activities: Custom ledgers, Weigh books, Short administrative series, Freight books, Harbour fee, Pole penny, Drafts of Sjöpass “Sea Passports”, Planks granted for ballast, Ice break-up, Official port statistics, Ship record, Descriptive sources	The National Archive of Sweden; The City archive of Stockholm; The National Board of Trade, Huvudarkivet, (Main archive); The Chancellor’s archive	date of the start of the sailing season; quantitative reconstruction (QUAN): time series of dates, regarded as proxies for winter/spring temperatures; qualitative index series (QUAL): Descriptive climate information from all sources: seven-point ordinal classification	Stockholm harbour	Stora Sjötullen 1st Arrival	ice break up series	direct observed, indirect organic	yes	ts	Lotta.Leijonhufvud@natgeo.su.se	Leijonhufvud, Lotta et al. “Five Centuries of Stockholm Winter/Spring Temperatures Reconstructed from Documentary Evidence and Instrumental Observations.” Climatic Change 101 (2010): 109–41.	x	https://www.ncdc.noaa.gov/paleo-search/study/10429
309	t	temperature	annual	JFMA	1636	1841	206			Stockholm	Sweden	Europe	6	75	59.15	18					0		administrative records related to shipping and harbour activities: Custom ledgers, Weigh books, Short administrative series, Freight books, Harbour fee, Pole penny, Drafts of Sjöpass “Sea Passports”, Planks granted for ballast, Ice break-up, Official port statistics, Ship record, Descriptive sources	The National Archive of Sweden; The City archive of Stockholm; The National Board of Trade, Huvudarkivet, (Main archive); The Chancellor’s archive, Stockholms	date of the start of the sailing season; quantitative reconstruction (QUAN): time series of dates, regarded as proxies for winter/spring temperatures; qualitative index series (QUAL): Descriptive climate information from all sources: seven-point ordinal classification	Stockholm harbour	City of Stockholm's import tax 1st Arrival	ice break up series	direct observed, indirect organic	yes	ts	Lotta.Leijonhufvud@natgeo.su.se	Leijonhufvud, Lotta et al. “Five Centuries of Stockholm Winter/Spring Temperatures Reconstructed from Documentary Evidence and Instrumental Observations.” Climatic Change 101 (2010): 109–41.	x	https://www.ncdc.noaa.gov/paleo-search/study/10429
310	t	temperature	annual	JFMA	1636	1841	206			Stockholm	Sweden	Europe	6	75	59.15	18					0		administrative records related to shipping and harbour activities: Custom ledgers, Weigh books, Short administrative series, Freight books, Harbour fee, Pole penny, Drafts of Sjöpass “Sea Passports”, Planks granted for ballast, Ice break-up, Official port statistics, Ship record, Descriptive sources	The National Archive of Sweden; The City archive of Stockholm; The National Board of Trade, Huvudarkivet, (Main archive); The Chancellor’s archive, Stockholms	date of the start of the sailing season; quantitative reconstruction (QUAN): time series of dates, regarded as proxies for winter/spring temperatures; qualitative index series (QUAL): Descriptive climate information from all sources: seven-point ordinal classification	Stockholm harbour	City of Stockholm's export tax 1st Departure	ice break up series	direct observed, indirect organic	yes	ts	Lotta.Leijonhufvud@natgeo.su.se	Leijonhufvud, Lotta et al. “Five Centuries of Stockholm Winter/Spring Temperatures Reconstructed from Documentary Evidence and Instrumental Observations.” Climatic Change 101 (2010): 109–41.	x	https://www.ncdc.noaa.gov/paleo-search/study/10429
311	t	temperature	annual	JFMA	1733	1831	99			Stockholm	Sweden	Europe	6	75	59.15	18					0		administrative records related to shipping and harbour activities: Custom ledgers, Weigh books, Short administrative series, Freight books, Harbour fee, Pole penny, Drafts of Sjöpass “Sea Passports”, Planks granted for ballast, Ice break-up, Official port statistics, Ship record, Descriptive sources	The National Archive of Sweden; The City archive of Stockholm; The National Board of Trade, Huvudarkivet, (Main archive); The Chancellor’s archive, Stockholms	date of the start of the sailing season; quantitative reconstruction (QUAN): time series of dates, regarded as proxies for winter/spring temperatures; qualitative index series (QUAL): Descriptive climate information from all sources: seven-point ordinal classification	Stockholm harbour	sea passport, insurance document for ships	ice break up series	direct observed, indirect organic	yes	ts	Lotta.Leijonhufvud@natgeo.su.se	Leijonhufvud, Lotta et al. “Five Centuries of Stockholm Winter/Spring Temperatures Reconstructed from Documentary Evidence and Instrumental Observations.” Climatic Change 101 (2010): 109–41.	x	https://www.ncdc.noaa.gov/paleo-search/study/10429
312	t	temperature	annual	JFMA	1815	1892	78			Stockholm	Sweden	Europe	6	75	59.15	18					0		administrative records related to shipping and harbour activities: Custom ledgers, Weigh books, Short administrative series, Freight books, Harbour fee, Pole penny, Drafts of Sjöpass “Sea Passports”, Planks granted for ballast, Ice break-up, Official port statistics, Ship record, Descriptive sources	The National Archive of Sweden; The City archive of Stockholm; The National Board of Trade, Huvudarkivet, (Main archive); The Chancellor’s archive, Stockholms	date of the start of the sailing season; quantitative reconstruction (QUAN): time series of dates, regarded as proxies for winter/spring temperatures; qualitative index series (QUAL): Descriptive climate information from all sources: seven-point ordinal classification	Stockholm harbour	official statistics from the harbour master of Stockholm when the sailing season started.	ice break up series	direct observed, indirect organic	yes	ts	Lotta.Leijonhufvud@natgeo.su.se	Leijonhufvud, Lotta et al. “Five Centuries of Stockholm Winter/Spring Temperatures Reconstructed from Documentary Evidence and Instrumental Observations.” Climatic Change 101 (2010): 109–41.	x	https://www.ncdc.noaa.gov/paleo-search/study/10429
313	t	temperature	annual	JFMA	1793	1837	45			Årsta	Sweden	Europe	6	75	59.15	18					0		administrative records related to shipping and harbour activities: Custom ledgers, Weigh books, Short administrative series, Freight books, Harbour fee, Pole penny, Drafts of Sjöpass “Sea Passports”, Planks granted for ballast, Ice break-up, Official port statistics, Ship record, Descriptive sources	The National Archive of Sweden; The City archive of Stockholm; The National Board of Trade, Huvudarkivet, (Main archive); The Chancellor’s archive, Stockholms	date of the start of the sailing season; quantitative reconstruction (QUAN): time series of dates, regarded as proxies for winter/spring temperatures; qualitative index series (QUAL): Descriptive climate information from all sources: seven-point ordinal classification	ice break up of Årsta bay	Årsta diary: a private diary by lady Reenstierna. Daily weather observations, including ice break-ups in the bay of Årsta	ice break up series	direct observed, indirect organic	yes	ts	Lotta.Leijonhufvud@natgeo.su.se	Leijonhufvud, Lotta et al. “Five Centuries of Stockholm Winter/Spring Temperatures Reconstructed from Documentary Evidence and Instrumental Observations.” Climatic Change 101 (2010): 109–41.	x	https://www.ncdc.noaa.gov/paleo-search/study/10429
314	t	temperature	annual	JFMA	1500	1892	393	1893	2000	Stockholm	Sweden	Europe	6	75	59.15	18					0		administrative records related to shipping and harbour activities: Custom ledgers, Weigh books, Short administrative series, Freight books, Harbour fee, Pole penny, Drafts of Sjöpass “Sea Passports”, Planks granted for ballast, Ice break-up, Official port statistics, Ship record, Descriptive sources	The National Archive of Sweden; The City archive of Stockholm; The National Board of Trade, Huvudarkivet, (Main archive); The Chancellor’s archive, Stockholms	date of the start of the sailing season; quantitative reconstruction (QUAN): time series of dates, regarded as proxies for winter/spring temperatures; qualitative index series (QUAL): Descriptive climate information from all sources: seven-point ordinal classification	Stockholm harbour	reconstructed January-April Stockholm temperatures	temperature reconstruction	direct observed, indirect organic	yes	r	Lotta.Leijonhufvud@natgeo.su.se	Leijonhufvud, Lotta et al. “Five Centuries of Stockholm Winter/Spring Temperatures Reconstructed from Documentary Evidence and Instrumental Observations.” Climatic Change 101 (2010): 109–41.	x	https://www.ncdc.noaa.gov/paleo-search/study/10429
315	p	precipitation	annual	DJFM	1765	1849	85	1850	2015	Ireland	Ireland	Europe	6				51.5	55.5	-5.5	-10.5	1	area of ireland	newspapers: Belfast Newsletter, Freeman's Journal etc. (see paper for full list)	Irish Newspaper Archive (www.irishnewsarchive.com)	plant phenology record	reports of drought events and impacts	drought reconstruction (SPI) with instumental data	drought reconstruction SPI	direct observed	yes	r	conor.murphy@nuim.ie	Murphy, Connor et al. "Irish droughts in newspaper archives: rediscovering forgotten hazards?" Weather 72 (2017): 151-155.; Noone Simon et al. "250 year drought catalogue for the Island of Ireland (1765–2015)." International Journal of Climatology 37 (2017): 239-254.; Wilby, Robert L. "An evaluation of persistent meteorological drought using a homogeneous Island of Ireland precipitation network."…	x	will be published in Documentary Proxy Dataset, for now contact angela-maria.burgdorf@giub.unibe.ch
316	t	temperature	annual	AMJJ	1721	1849	129	1850	2000	Tallinn	Estland	Europe	6	10	59.4	24.75					0		port journals, custom books, town council minutes, letters, trade companies' documents, newspapers, periodicals, and memoirs	Tallinn town archives; "Estonian Historical Archive", Tartu	plant phenology record	first day of rye harvest	harvest dates from 25 locations	rye harvest series	Indirect organic	yes	ts	oyvind.nordli@met.no	Tarand, A. and Nordli, P. Øyvind. "The Tallinn temperature series reconstructed back half a millennium by use of proxy data." Climatic Change 48 (2001): 189-199.	x	https://www.ncdc.noaa.gov/paleo-search/study/22834
317	t	temperature	annual	DJFM	1500	1849	350	1850	2000	Tallinn	Estland	Europe	6	10	59.4	24.75					0		port journals, custom books, town council minutes, letters, trade companies' documents, newspapers, periodicals, and memoirs	Tallinn town archives; "Estonian Historical Archive", Tartu	ice phenology record	first day of ice break-up in Tallinn port	reconstructed December-March temperatures	ice break up series	Indirect inorganic	yes	ts	oyvind.nordli@met.no	Tarand, A. and Nordli, P. Øyvind. "The Tallinn temperature series reconstructed back half a millennium by use of proxy data." Climatic Change 48 (2001): 189-199.	x	https://www.ncdc.noaa.gov/paleo-search/study/22834
318	t	temperature	annual	DJFM	1500	1849	350	1850	2000	Tallinn	Estland	Europe	6	10	59.4	24.75					0		port journals, custom books, town council minutes, letters, trade companies' documents, newspapers, periodicals, and memoirs	Tallinn town archives; "Estonian Historical Archive", Tartu	ice phenology record	first day of ice break-up in Tallinn port	reconstructed December-March temperatures	temperature reconstruction	Indirect inorganic	yes	r	oyvind.nordli@met.no	Tarand, A. and Nordli, P. Øyvind. "The Tallinn temperature series reconstructed back half a millennium by use of proxy data." Climatic Change 48 (2001): 189-199.	x	https://www.ncdc.noaa.gov/paleo-search/study/22834
319	t	temperature	annual	AMJJ	1731	1849	119	1850	2000	Tallinn		Europe	6	10	59.4	24.75					0		port journals, custom books, town council minutes, letters, trade companies' documents, newspapers, periodicals, and memoirs	Tallinn town archives; "Estonian Historical Archive", Tartu	plant phenology record	first day of the rye harvest, first day of ice break-up on the rivers in northern Estonia	reconstructed April-July temperatures	temperature reconstruction	indirect organic, indirect inorganic	yes	r	oyvind.nordli@met.no	Tarand, A. and Nordli, P. Øyvind. "The Tallinn temperature series reconstructed back half a millennium by use of proxy data." Climatic Change 48 (2001): 189-199.	x	https://www.ncdc.noaa.gov/paleo-search/study/22834
320	t	temperature	annual		1721	1956	236			Irkutsk	Russia	Europe	6	10	52.3	106.33					0		separate notes and observations of various explorers of Siberia, Irkutsk chronicles	not specified in paper	historical data on ice regime from the Listvyanka and Nizhneangarsk Stations, ice phenology data on Angara river	ice freeze up of Angara River	ice freeze-up series	ice freeze up series	indirect inorganic	yes	ts	alexei.kouraev@legos.obs-mip.fr	Kouraev, Alexei et al. "The ice regime of Lake Baikal from historical and satellite data: Relationship to air temperature, dynamical, and other factors." Limnology and Oceanography 52 (2007): 1268-1286.	x	http://nsidc.org/data/lake_river_ice/freezethaw.html
321	t	temperature	annual		1721	1956	236			Irkutsk	Russia	Europe	6	10	52.3	106.33					0		separate notes and observations of various explorers of Siberia, Irkutsk chronicles	not specified in paper	historical data on ice regime from the Listvyanka and Nizhneangarsk Stations, ice phenology data on Angara river	ice break up of Angara River	ice break-up series	ice break up series	indirect inorganic	yes	ts	alexei.kouraev@legos.obs-mip.fr	Kouraev, Alexei et al. "The ice regime of Lake Baikal from historical and satellite data: Relationship to air temperature, dynamical, and other factors." Limnology and Oceanography 52 (2007): 1268-1286.	x	http://nsidc.org/data/lake_river_ice/freezethaw.html
322	p	precipitation	daily		1751	1900	150			south-eastern Moravia, Czech Republic	Czech Republic	Europe	6				48.8	50	17	17.8	2	based on graph in paper	taxation records	Moravian Land Archives, Brno; Uherské Hradiště State District Archives; Hodonı́n State District Archives	harvest related records, records on extreme events	tax relief for farmers if their crop yields had been negatively affected by hydrological and meteorological extremes: type of extreme event (flood, thunderstorm, flash flood, late frost, windstorm) and the date of its occurrence	Annual frequency of reported total extreme hydrometeorological events; Annual frequency of individually classified types of extremes	frequency of hydrological extreme events	indirect organic, direct observed	yes	e	brazdil@sci.muni.cz	Brázdil, Rudolf et al. “Hydrometeorological Extremes Derived from Taxation Records for South-Eastern Moravia, Czech Republic, 1751–1900 AD.” Climate of the Past 8 (2012): 467–81
323	p	precipitation	monthly		1501	1854	354	1804	2010	Czech Lands (now the Czech Republic)	Czech Republic	Europe	6		49.817	15.473	48.5	51	12.1	18.8	1	Czech Republic	annals, chron-annals, chronicles, memoirs; weather diaries (visual daily weather records); personal and official correspondence; financial records; special publications and broadsheets; newspapers; liturgical records; epigraphic information; and early instrumental observations	Moravian Land Archives, Brno and more?	weather and climate reports	descriptive information about the weather and related phenomena	seven-point ordinal index for precipitation: -3/3 =extremely dry to extremely wet	precipitation index	direct observed	yes	i	dobro@sci.muni.cz	Dobrovolný, Petr et al. “Precipitation Reconstruction for the Czech Lands, AD 1501–2010.” International Journal of Climatology 35 (2015): 1–14.	x	will be published in Documentary Proxy Dataset, for now contact angela-maria.burgdorf@giub.unibe.ch
324	p	precipitation	monthly		1501	1854	354	1804	2010	Czech Lands (now the Czech Republic)	Czech Republic	Europe	6		49.817	15.473	48.5	51	12.1	18.8	1	Czech Republic	annals, chron-annals, chronicles, memoirs; weather diaries (visual daily weather records); personal and official correspondence; financial records; special publications and broadsheets; newspapers; liturgical records; epigraphic information; and early instrumental observations	Moravian Land Archives, Brno and more?	weather and climate reports	descriptive information about the weather and related phenomena	long homogenized series of reconstructed seasonal precipitation anomalies based on precipitation index	precipitation reconstruction	direct observed	yes	r	dobro@sci.muni.cz	Dobrovolný, Petr et al. “Precipitation Reconstruction for the Czech Lands, AD 1501–2010.” International Journal of Climatology 35 (2015): 1–14.	x	will be published in Documentary Proxy Dataset, for now contact angela-maria.burgdorf@giub.unibe.ch
325	p	precipitation	annual	AMJJA	1501	1854	354	1841	2012	Czech Lands (now the Czech Republic)	Czech Republic	Europe	6		49.817	15.473	48.5	51	12.1	18.8	1	Czech Republic	documentary evidence (chronicles, town documents, aristocratic documents, ecclesiastical materials, farming calendars, personal diaries, farming records and reports);systematic phenological observations after 1845 (PHENO DATA database)	not specified in paper	plant phenology record	Observations of grape harvest days; vintage quality data (vintage quality assessment: 2, excellent; 1, good; 0, average; and −1, poor)	grape harvest dates	grape harvest date (GHD) series	indirect organic	yes	ts	martin.mozny@chmi.cz	Martin Možný et al. "Drought reconstruction based on grape harvest dates for the Czech Lands, 1499−2012" Climatic Research 70 (2016):119-132.	x	https://www.echdb.unibe.ch/
326	p	precipitation	annual	AMJJA	1501	1854	354	1841	2012	Czech Lands (now the Czech Republic)	Czech Republic	Europe	6		49.817	15.473	48.5	51	12.1	18.8	1	Czech Republic	documentary evidence (chronicles, town documents, aristocratic documents, ecclesiastical materials, farming calendars, personal diaries, farming records and reports);systematic phenological observations after 1845 (PHENO DATA database)	not specified in paper	plant phenology record	Observations of grape harvest days; vintage quality data (vintage quality assessment: 2, excellent; 1, good; 0, average; and −1, poor)	Reconstructed April−August Standardized Precipitation Evapotranspiration Index (SPEI)	precipitation reconstruction	indirect organic	yes	r	martin.mozny@chmi.cz	Martin Možný et al. "Drought reconstruction based on grape harvest dates for the Czech Lands, 1499−2012" Climatic Research 70 (2016):119-132.	x	https://www.echdb.unibe.ch/
327	t	temperature	annual	MAMJ	1499	2008	510			Czech Republic	Czech Republic	Europe	6		49.817	15.473	48.5	51	12.1	18.8	1	Czech Republic	documentary evidence (chronicles, farming calendars, personal diaries, farming records and reports);systematic phenological observations after 1845 (PHENO DATA database)	not specified in paper	plant phenology record	Observations of cereal crop harvest (winter wheat) harvest days (WWHD)		winter grain harvest date (WGHD) series	Indirect organic	yes	ts	martin.mozny@chmi.cz	Martin Možný et al. "Cereal harvest dates as a proxy for Czech Republic March to June temperature." Climatic Change 110 (2012): 801-812.	x	https://www.echdb.unibe.ch/
328	t	temperature	annual	MAMJ	1499	2008	510			Czech Republic	Czech Republic	Europe	6		49.817	15.473	48.5	51	12.1	18.8	1	Czech Republic	documentary evidence (chronicles, farming calendars, personal diaries, farming records and reports);systematic phenological observations after 1845 (PHENO DATA database)	not specified in paper	plant phenology record	Observations of cereal crop harvest (winter wheat) harvest days (WWHD)	Reconstructed March-June temperatures	temperature reconstruction	Indirect organic	yes	r	martin.mozny@chmi.cz	Martin Možný et al. "Cereal harvest dates as a proxy for Czech Republic March to June temperature." Climatic Change 110 (2012): 801-812.	x	https://www.echdb.unibe.ch/
329	t	temperature	annual	AMJJA	1499	2015	517	1801	2015	Czech Republic	Czech Republic	Europe	6		49.817	15.473	49.7	50.7	13.5	15.5	2	estimated based on graph, Czech Republic	documentary evidence (chronicles, farming calendars, personal diaries, farming records and reports);systematic phenological observations after 1845 (PHENO DATA database)	not specified in paper	plant phenology record	5431 GHD from 61 sites; observed by institutional phenological networks (1845–2015) PHENODATA database of the Czech Hydrometeorological Institute (CHMI)		grape harvest date (GHD) series	Indirect organic	yes	ts	martin.mozny@chmi.cz	Martin Možný et al. "April-August temperatures in the Czech Lands, 1499-2015, reconstructed from grape-harvest dates." Climate of the Past 12 (2016): 1421-1434.	x	https://www.echdb.unibe.ch/
330	t	temperature	annual	AMJJA	1499	2015	517	1801	2015	Czech Republic	Czech Republic	Europe	6		49.817	15.473	49.7	50.7	13.5	15.5	2	estimated based on graph, Czech Republic	documentary evidence (chronicles, farming calendars, personal diaries, farming records and reports);systematic phenological observations after 1845 (PHENO DATA database)	not specified in paper	plant phenology record	5431 GHD from 61 sites; observed by institutional phenological networks (1845–2015) PHENODATA database of the Czech Hydrometeorological Institute (CHMI)	Reconstructed April-August temperatures	temperature reconstruction	Indirect organic	yes	r	martin.mozny@chmi.cz	Martin Možný et al. "April-August temperatures in the Czech Lands, 1499-2015, reconstructed from grape-harvest dates." Climate of the Past 12 (2016): 1421-1434.	x	https://www.echdb.unibe.ch/
331	t	temperature	annual	MJJ	1618	1873	256	1874	2006	Kőszeg	Hungary	Europe	6		47.3833	16.5333					0		five vine- and grain-related historical phenological series	town archives of Kőszeg	plant phenology record	five different phenology series: beginning of grape ripening dates (GR), beginning of vine harvest dates (VD), collection dates of vine tithes (TV), collection dates of grain tithes (TG) and vine quality (VQ) indices	Reconstructed May-June temperatures	temperature reconstruction	Indirect organic	yes	r	kissandi@geo.u-szeged.hu	Kiss, Andrea et al. "An experimental 392-year documentary-based multi proxy (vine and grain) reconstruction of May-July temperatures for Koszeg, West-Hungary." International Journal of Biometeorology 55 (2011): 595-611.	x	https://www.ncdc.noaa.gov/paleo-search/study/13138
332	t	temperature	annual	MJJ	1618	1873	256	1874	2006	Kőszeg	Hungary	Europe	6		47.3833	16.5333					0		historical phenological series	town archives of Kőszeg	plant phenology record	beginning of grape ripening dates (GR)	Grape Ripening Date: announcing the appearance of ripened grapes; election date of vine shepherds (guarding vineyards)	grape ripening date series	Indirect organic	yes	ts	kissandi@geo.u-szeged.hu	Kiss, Andrea et al. "An experimental 392-year documentary-based multi proxy (vine and grain) reconstruction of May-July temperatures for Koszeg, West-Hungary." International Journal of Biometeorology 55 (2011): 595-611.	x	https://www.ncdc.noaa.gov/paleo-search/study/13138
333	t	temperature	annual	MJJ	1618	1873	256	1874	2006	Kőszeg	Hungary	Europe	6		47.3833	16.5333					0		historical phenological series	town archives of Kőszeg	plant phenology record	beginning of vine harvest dates (VD)	Vine Harvest Date: starting date of common (grapevine) harvest	grape harvest date (GHD) series	Indirect organic	yes	ts	kissandi@geo.u-szeged.hu	Kiss, Andrea et al. "An experimental 392-year documentary-based multi proxy (vine and grain) reconstruction of May-July temperatures for Koszeg, West-Hungary." International Journal of Biometeorology 55 (2011): 595-611.	x	https://www.ncdc.noaa.gov/paleo-search/study/13138
334	t	temperature	annual	MJJ	1618	1873	256	1874	2006	Kőszeg	Hungary	Europe	6		47.3833	16.5333					0		historical phenological series	town archives of Kőszeg	harvest related records	collection dates of vine tithes (TV)	Grain Tithe Collection Dates: starting date of collecting church tax - cereals	grain tithe collection date series	Indirect organic	yes	ts	kissandi@geo.u-szeged.hu	Kiss, Andrea et al. "An experimental 392-year documentary-based multi proxy (vine and grain) reconstruction of May-July temperatures for Koszeg, West-Hungary." International Journal of Biometeorology 55 (2011): 595-611.	x	https://www.ncdc.noaa.gov/paleo-search/study/13138
335	t	temperature	annual	MJJ	1618	1873	256	1874	2006	Kőszeg	Hungary	Europe	6		47.3833	16.5333					0		historical phenological series	town archives of Kőszeg	harvest related records	collection dates of grain tithes (TG)	Wine Tithe Collection Dates: starting date of collecting church tax - wine	grape tithe collection date series	Indirect organic	yes	ts	kissandi@geo.u-szeged.hu	Kiss, Andrea et al. "An experimental 392-year documentary-based multi proxy (vine and grain) reconstruction of May-July temperatures for Koszeg, West-Hungary." International Journal of Biometeorology 55 (2011): 595-611.	x	https://www.ncdc.noaa.gov/paleo-search/study/13138
336	t	temperature	annual	MJJ	1618	1873	256	1874	2006	Kőszeg	Hungary	Europe	6		47.3833	16.5333					0		historical phenological series	town archives of Kőszeg	harvest related records	vine quality (VQ) indices	Wine Quality Index: 5-scale indexing of descriptive annual wine quality information (1=very bad, 2=bad, 0=average, mediocre, 1=good, 2=very good, excellent)	wine quality index	Indirect organic	yes	i	kissandi@geo.u-szeged.hu	Kiss, Andrea et al. "An experimental 392-year documentary-based multi proxy (vine and grain) reconstruction of May-July temperatures for Koszeg, West-Hungary." International Journal of Biometeorology 55 (2011): 595-611.	x	https://www.ncdc.noaa.gov/paleo-search/study/13138
337	t	temperature	monthly		1502	1825	324	1826	2000	Poland	Poland	Europe	6		51.9194	19.1451					1	Poland	paper not available	published sources by Instytut Meteorologii i Gospodarki Wodnej (IMGW); Centrum Monitoringu Klimatu Polski (Institute of Meteorology and Water Management, Center for Poland's Climate Monitoring)		paper not available	seven-point ordinal indices for temperature: -3/3	temperature index	paper not available	yes	i		Klimat Krakowa w XX wieku (Climate of Cracow in 20th Century). 2007. IGiGP UJ, edited by D. Matuszko 251p.	x	https://www.ncdc.noaa.gov/paleo-search/study/10050
338	p	precipitation	monthly		1502	1825	324	1826	2000	Poland	Poland	Europe	6		51.9194	19.1451					1	Poland	paper not available	published sources by Instytut Meteorologii i Gospodarki Wodnej (IMGW); Centrum Monitoringu Klimatu Polski (Institute of Meteorology and Water Management, Center for Poland's Climate Monitoring)		paper not available	seven-point ordinal indices for precipitation: -3/3	precipitation index	paper not available	yes	i		Klimat Krakowa w XX wieku (Climate of Cracow in 20th Century). 2007. IGiGP UJ, edited by D. Matuszko 251p.	x	https://www.ncdc.noaa.gov/paleo-search/study/10050
339	t	temperature	monthly		1792	1825	34	1826	2000	Cracow	Poland	Europe	6	220	50.067	19.967					0		paper not available	published sources by Instytut Meteorologii i Gospodarki Wodnej (IMGW); Centrum Monitoringu Klimatu Polski (Institute of Meteorology and Water Management, Center for Poland's Climate Monitoring)		paper not available	seven-point ordinal indices for temperature: -3/3	temperature index	paper not available	yes	i		Klimat Krakowa w XX wieku (Climate of Cracow in 20th Century). 2007. IGiGP UJ, edited by D. Matuszko 251p.	x	https://www.ncdc.noaa.gov/paleo-search/study/10050
340	p	precipitation	monthly		1812	1839	28	1840	2000	Cracow	Poland	Europe	6	220	50.067	19.967					0		paper not available	published sources by Instytut Meteorologii i Gospodarki Wodnej (IMGW); Centrum Monitoringu Klimatu Polski (Institute of Meteorology and Water Management, Center for Poland's Climate Monitoring)		paper not available	seven-point ordinal indices for precipitation: -3/3	precipitation index	paper not available	yes	i		Klimat Krakowa w XX wieku (Climate of Cracow in 20th Century). 2007. IGiGP UJ, edited by D. Matuszko 251p.	x	https://www.ncdc.noaa.gov/paleo-search/study/10050
341	t	temperature	monthly		1779	1880	102	1881	2000	Warsaw	Poland	Europe	6	110	52.2167	21.033					0		paper not available	published sources by Instytut Meteorologii i Gospodarki Wodnej (IMGW); Centrum Monitoringu Klimatu Polski (Institute of Meteorology and Water Management, Center for Poland's Climate Monitoring)		paper not available	seven-point ordinal indices for temperature: -3/3	temperature index	paper not available	yes	i		Klimat Krakowa w XX wieku (Climate of Cracow in 20th Century). 2007. IGiGP UJ, edited by D. Matuszko 251p.	x	https://www.ncdc.noaa.gov/paleo-search/study/10050
342	t	temperature	monthly		1701	1800	100	1881	2000	Wroclaw	Poland	Europe	6	120	51.1	16.883					0		paper not available	published sources by Instytut Meteorologii i Gospodarki Wodnej (IMGW); Centrum Monitoringu Klimatu Polski (Institute of Meteorology and Water Management, Center for Poland's Climate Monitoring)		paper not available	seven-point ordinal indices for temperature: -3/3	temperature index	paper not available	yes	i		Klimat Krakowa w XX wieku (Climate of Cracow in 20th Century). 2007. IGiGP UJ, edited by D. Matuszko 251p.	x	https://www.ncdc.noaa.gov/paleo-search/study/10050
343	t	temperature	monthly		1650	1900	251			Carpathian basin	Austria, Slovakia, Croatia, Hungary, Serbia, Romania	Europe	6				44	50	15	25	2	based on graph in paper	documentary collection of Réthly (Réthly, 1962, 1970, 1999); in Hungarian	not specified in paper; see Réthly, (1962, 1970, 1999)	reports on weather and climate	temperature-related climate events and extremes evaluated via a code system	seven-point ordinal index for temperature: -3/3 =cold/warm	temperature index	direct observed	yes	i	bari@ludens.elte.hu	Bartholy, Judit et al. "Classification and analysis of past climate information based on historical documentary sources for the Carpathian Basin." International Journal of Climatology 24 (2004): 1759-1776.	x	will be published in Documentary Proxy Dataset, for now contact angela-maria.burgdorf@giub.unibe.ch
344	p	precipitation	monthly		1760	1863	104	1864	2003	Bern	Switzerland	Europe	6		46.948	7.4474					1	Bern	weather diaries	not specified in paper	daily weather records	descriptive information about precipitation, wind and exceptional weather phenomena	reconstructed monthly precipitation (mm)	precipitation reconstruction	direct observed	yes	r	urs.gimmi@wsl.ch	Gimmi, Urs et al. “A Method to Reconstruct Long Precipitation Series Using Systematic Descriptive Observations in Weather Diaries: The Example of the Precipitation Series for Bern, Switzerland (1760–2003).” Theoretical and Applied Climatology 87 (2007): 185–97.	x	will be published in Documentary Proxy Dataset, for now contact angela-maria.burgdorf@giub.unibe.ch
345	p	precipitation	monthly		1525	1979	455			Central Europe	Switzerland	Europe	6		47.1167	7.367					1	not specified what "Central Europe" means; coordinates of Swiss Plateau are used	chronicles, from personal papers (diaries, calendars) containing intermittent meteorological entries, from non-instrumental weather diaries to weather logs	Swiss libraries and archives	ice phenology record	snow-cover and the freezing of water bodies; phenophases or other signs of biological activity; climatic anomalies (floods, droughts); Tithe auction dates; harvest yields	monthly precipitation indices	precipitation index	direct observed, indirect organic, indirect inorganic	yes	i	christian.pfister@hist.unibe.ch	Pfister, Christian "The creation of high resolution spatio- temporal reconstructions of past climate from direct meteorological observations and proxy data. Methodological considerations and results. Climate in Europe 1675-1715." In Climatic Trends and Anomalies in Europe 1675–1715, edited by Frenzel, B., Pfister C., Glaeser, B, 329–76. Stuttgart: 1994. Pfister, Christian “Monthly temperature and…	x	https://www.ncdc.noaa.gov/paleo/study/5411
346	t	temperature	monthly		1525	1979	455			Central Europe	Switzerland	Europe	6		47.1167	7.367					1	not specified what "Central Europe" means; coordinates of Swiss Plateau are used	chronicles, from personal papers (diaries, calendars) containing intermittent meteorological entries, from non-instrumental weather diaries to weather logs	Swiss libraries and archives	ice phenology record	snow-cover and the freezing of water bodies; phenophases or other signs of biological activity; climatic anomalies (floods, droughts); Tithe auction dates; harvest yields	monthly temperature indices	temperature index	direct observed, indirect organic, indirect inorganic	yes	i	christian.pfister@hist.unibe.ch	Pfister, Christian "The creation of high resolution spatio- temporal reconstructions of past climate from direct meteorological observations and proxy data. Methodological considerations and results. Climate in Europe 1675-1715." In Climatic Trends and Anomalies in Europe 1675–1715, edited by Frenzel, B., Pfister C., Glaeser, B, 329–76. Stuttgart: 1994. Pfister, Christian “Monthly temperature and…	x	https://www.ncdc.noaa.gov/paleo/study/5411
347	t	temperature	annual	AMJJA	1480	2006	527			Switzerland (Midlands)	Switzerland	Europe	6	550			46.75	47.5	6.75	8.75	0		referenced to EuroClimhist	referenced to EuroClimhist	plant phenology record	date of the grape harvest series (GHD) of 15 locations	Median time series of Swiss grape harvest dates	grape harvest date (GHD) series	Indirect organic	yes	ts	this.rutishauser@giub.unibe.ch	Meier, Nicole et al. "Grape harvest dates as a proxy for Swiss April to August temperature reconstructions back to AD 1480." Geophysical Research Letters 34 (2007): L20705.	x	https://www.ncdc.noaa.gov/paleo-search/study/6099
348	t	temperature	annual	AMJJA	1480	2006	527			Switzerland (Midlands)	Switzerland	Europe	6	550			46.75	47.5	6.75	8.75	0		referenced to EuroClimhist	referenced to EuroClimhist	plant phenology record	date of the grape harvest series (GHD) of 15 locations	Reconstructed April-August temperatures	temperature reconstruction	Indirect organic	yes	r	this.rutishauser@giub.unibe.ch	Meier, Nicole et al. "Grape harvest dates as a proxy for Swiss April to August temperature reconstructions back to AD 1480." Geophysical Research Letters 34 (2007): L20705.	x	https://www.ncdc.noaa.gov/paleo-search/study/6099
349	t	temperature	monthly		1500	1854	355	1760	2007	Central Europe	Switzerland, Germany, Czech Republic	Europe	6				45	53	6	20	0		annals, town or family chronicles, personal diaries,weather diaries, newspapers, sources of economic character, Visual daily weather records, plant-phenological evidence	not specified in paper		reports on temperature-related features; documentary index series from Germany, Switzerland and Czech Republic (1500–1854); 11 instrumental temperature records (1760–2007)	reconstructed monthly mean temperatures based on seven-point ordinal temperature indices: -3/3= extremely cold, very cold, cold, normal, warm, very warm, extremely warm	temperature reconstruction	direct observed, indirect organic	no	r	dobro@sci.muni.cz	Dobrovolný, Petr et al. "Monthly, seasonal and annual temperature reconstructions for Central Europe derived from documentary evidence and instrumental records since AD 1500." Climatic Change 101 (2010): 69-107	x	https://www.ncdc.noaa.gov/paleo/study/9970
350	t	temperature	annual	J	1406	1985	580			northern Italy	Italy	Europe	6				44	46.5	7	14	1	not specified what "Northern Italy" means; coordinates of estimated	chronicles, annals, diaries, letters,	archival sources in northern Italy		reports on locusts invasions (=grasshoppers), freezing of the Venetian lagoon, sea flooding at Venice, thunderstorms and hailstorms; winter severity indications; "winters dated by January"	catalog of great and severe winters in northern Italy	severe winters catalog	direct observed, indirect inorganic	yes	e	d.camuffo@isac.cnr.it	Camuffo, Dario, and Silvia Enzi. “Reconstructing the Climate of Northern Italy from Archive Sources.” In Climate Since A.D. 1500, edited by R.S. Bradley and P.D. Jones, revised, 143–54. London: Routledge, 1995.
351	p	precipitation	annual		1581	2007	427			southern Italy	Italy	Europe	6				36.8	41.9	13.6	18.8	0		chronicles (Ferrari 1977), annals (Corradi 1972), liturgical offices (Piervitali & Colacino 2001), Catalogue EVA – Environmental Events of the ENEA (Clemente and Margottini 1991)	not specified in paper		reports of environmental and climatological extremes and their consequences, famines, weather informations	annual drought weighted index sum (DWIS) based on an monthly drought (DI) classificaiton: 1=meteorological drought associated with agricultural drought at least two sites, 0=otherwise; DWI: 0-3= 0 for absence of drought, 1 for 3≤ drought duration ≤5 mo, 2 for drought duration >5 mo in each year (drought year = at least 3 continuous arid month (DI=1)); DWIS: 0-62= calculated for each year in a 31 …	drought index	direct observed	yes	i	nazdiod@tin.it	Diodato, Nazzareno and Gianni Bellocchi. “Historical perspective of drought response in central-southern Italy.” Climate Research 49 (2011): 189-200.
352	p	precipitation	annual		1675	1868	194	1869	2002	Benevento, southern Italy, Samnium River Region	Italy	Europe	6		41.1298	14.7826					1	Benveneto	chronicles, annals, archival records, Catalogue EVA – Environmental Events of the ENEA (Clemente and Margottini 1991)	Library of the Benevento State Archives; Library of the Samnium Museum of Benevento; Libraries Avellino and Benevento Provincials; Library Benevento Archiepiscopal; Library of the Campobasso State Archives		records of weather conditions that affect agriculture and living conditions; Benevento rain gauge (1869-2002)	monthly five-point ordinal precipitation index: -2/2 = hydrological droughts, meteorological droughts/lack of rain, normal conditions, intensive and/or continuous rains, rains with floods; Precipitation Index Sum (PIS)= sum of monthly values	precipitation index	direct observed	yes	i	nazdiod@tin.it	Diodato, Nazzareno. “Climatic Fluctuations in Southern Italy Since the 17th Century: Reconstruction with Precipitation Records at Benevento.” Climatic Change 80 (2007): 411–31.
353	p	precipitation	annual		1675	1868	194	1869	2002	Benevento, southern Italy, Samnium River Region	Italy	Europe	6		41.1298	14.7826					1	Benveneto	chronicles, annals, archival records, Catalogue EVA – Environmental Events of the ENEA (Clemente and Margottini 1991)	Library of the Benevento State Archives; Library of the Samnium Museum of Benevento; Libraries Avellino and Benevento Provincials; Library Benevento Archiepiscopal; Library of the Campobasso State Archives		records of weather conditions that affect agriculture and living conditions; Benevento rain gauge (1869-2002)	reconstructed annual precipitation anomalies	precipitation reconstruction	direct observed	yes	r	nazdiod@tin.it	Diodato, Nazzareno. “Climatic Fluctuations in Southern Italy Since the 17th Century: Reconstruction with Precipitation Records at Benevento.” Climatic Change 80 (2007): 411–31.
354	p	precipitation	annual		1565	1915	351			Erice, western Sicily	Italy	Europe	6		38.0381	12.5874					1	Erice	marble plate inside cathedral of Erice with procession dates, clerical chronicles	city hall library of Erice		dates and descriptions of processions, tales of historical and religious events	drought chronology	drought catalog	cultural	yes	e		Piervitali, E. and Colacino, M. "Evidence of Drought in Western Sicily during the Period 1565–1915 from Liturgical Offices." Climatic Change 49 (2001) 225–238.	*	http://inpro.unizar.es/
355	t	temperature	annual	AMJJA	1370	2003	634			Burgundy	France	Europe	6		45.316	5.016					0		grape-harvest date records	parish and municipal archives	plant phenology record	Grape-harvest dates (GHD) for Burgundy region	Reconstructed April-August temperatures	grape harvest date (GHD) series	Indirect organic	yes	ts	isabelle.chuine@cefe.cnrs.fr	Chuine, Isabel et al. “Historical Phenology: Grape Ripening as a Past Climate Indicator.” Nature 432 (2004): 289–90.	x	https://www.ncdc.noaa.gov/paleo/study/5414
356	t	temperature	annual	AMJJA	1370	2003	634			Burgundy	France	Europe	6		45.316	5.016					0		grape-harvest date records	parish and municipal archives	plant phenology record	Grape-harvest dates (GHD) for Burgundy region	Reconstructed April-August temperatures	temperature reconstruction	Indirect organic	yes	r	isabelle.chuine@cefe.cnrs.fr	Chuine, Isabel et al. “Historical Phenology: Grape Ripening as a Past Climate Indicator.” Nature 432 (2004): 289–90.	x	https://www.ncdc.noaa.gov/paleo/study/5414
357	t	temperature	annual	DJF	1550	1599	50			central Iberian Peninsula	Spain, Portugal	Europe	6				40.41	40.9	-4.6	-3.17	1	Avla, Segovia, Guadalajara, Madrid	public documents such as monastery records, books of agreements, orders or royal dispositions; private correspondence; reports on the state of the royal forests; tithe account books and game	Spanish National Library; Town Council of Segovia Archive; General of Palace Archive; General of Simancas Archive; Historic National Archive; Regional of Madrid Archive; Royal Monastery of San Lorenzo de El Escorial	reports on weather and climate	references to natural events when resulting in damage to goods or persons; spontaneous observations about events, especially weather; agricultural crops, wine production	Winter Cold Intensity (WCI): ordinal index ranging from +4 to −4	temperature index	direct observed, indirect organic	yes	i	teresa.bullon@uam.es	Bullón, Teresa. “Winter Temperatures in the Second Half of the Sixteenth Century in the Central Area of the Iberian Peninsula.” Climate of the Past 4 (2008): 357–67.	x	https://edatos.consorciomadrono.es/dataset.xhtml?persistentId=doi:10.21950/F96BVX
358	t	temperature	annual	DJF	1550	1599	50			central Iberian Peninsula	Spain, Portugal	Europe	6				40.41	40.9	-4.6	-3.17	1	Avla, Segovia, Guadalajara, Madrid	public documents such as monastery records, books of agreements, orders or royal dispositions; private correspondence; reports on the state of the royal forests; tithe account books and game	Spanish National Library; Town Council of Segovia Archive; General of Palace Archive; General of Simancas Archive; Historic National Archive; Regional of Madrid Archive; Royal Monastery of San Lorenzo de El Escorial	reports on weather and climate	references to natural events when resulting in damage to goods or persons; spontaneous observations about events, especially weather; agricultural crops, wine production	reconstructed winter (December-February) temperature	temperature reconstruction	direct observed, indirect organic	yes	r	teresa.bullon@uam.es	Bullón, Teresa. “Winter Temperatures in the Second Half of the Sixteenth Century in the Central Area of the Iberian Peninsula.” Climate of the Past 4 (2008): 357–67.	x	https://edatos.consorciomadrono.es/dataset.xhtml?persistentId=doi:10.21950/F96BVX
359	p	precipitation	daily		1506	1900	395			central Spain	Spain	Europe	6	540	39.85	-4.0167					0		rogation ceremonies (Toledo Cathedral Chapter Acts)	Toledo Cathedral Archives and at the Toledo Townhall Archives	rogation ceremony records, harvest related records	41 pro-pluvia rogations, 36 pro-serenitate rogations and 94 thanksgiving masses; Average of wheat and barley tithes for the Illescas, Escalona, Ocaña and Montalban archpriest hoods	Distribution of the pro-pluvia and pro-serenitate periods; Daily distribution of the rogation series	frequency of rogation ceremonies	cultural	yes	ts	f.dominguez@igme.es	Domínguez-Castro, Fernando et al. “Reconstruction of Drought Episodes for Central Spain from Rogation Ceremonies Recorded at the Toledo Cathedral from 1506 to 1900: A Methodological Approach.” Global and Planetary Change 63 (2008): 230–42.	*	http://inpro.unizar.es/
360	t	temperature	monthly		1675	1715	41			southern Portugal	Portugal	Europe	6				38.56	38.7167	-9.15	-7.9	0		diaries, ecclesiastical (rogation ceremonies), Misericordias municipal institutional sources	Biblioteca Pública de Évora; Biblioteca Nacional Lisboa; Arquivo Distrital de Evora, Arquivo da Misericordia de Evora	Reports of rogation ceremonies, Reports on economic and social measures; food distribution, health care; extreme weather events		tree-point ordinal monthly temperature index for temperature: -1/1= cold weather, normal, high temp; seasonal values ranging from -3/3, annual values: -12/12	temperature index	cultural, direct observed, indirect organic	yes	i	mjalcoforado@campus.ul.pt	Alcoforado, Maria-João et al. "Temperature and precipitation reconstruction in southern Portugal during the late Maunder Minimum (AD 1675-1715)." The Holocene 10 (2000): 333-340.	x	will be published in Documentary Proxy Dataset, for now contact angela-maria.burgdorf@giub.unibe.ch
361	p	precipitation	monthly		1675	1715	41			southern Portugal	Portugal	Europe	6				38.56	38.7167	-9.15	-7.9	0		diaries, ecclesiastical (rogation ceremonies), Misericordias municipal institutional sources	Biblioteca Pública de Évora; Biblioteca Nacional Lisboa; Arquivo Distrital de Evora, Arquivo da Misericordia de Evora	Reports of rogation ceremonies, Reports on economic and social measures; food distribution, health care; extreme weather events		tree-point ordinal monthly precipitation index for temperature: -1/1= drought episode, normal, heavy precip; seasonal values ranging from -3/3, annual values: -12/12	precipiation index	cultural, direct observed, indirect organic	yes	i	mjalcoforado@campus.ul.pt	Alcoforado, Maria-João et al. "Temperature and precipitation reconstruction in southern Portugal during the late Maunder Minimum (AD 1675-1715)." The Holocene 10 (2000): 333-340.	x	will be published in Documentary Proxy Dataset, for now contact angela-maria.burgdorf@giub.unibe.ch
362	p	precipitation	annual	DJF	1501	1850	350	1791	1997	Andalusia	Spain	Europe	6				36	38.7	-7.5	-1.6	1	Andalusia	urban annals, city histories, religious chronicles, brief reports of events, private correspondence, and registers from church and city archives	i.a. Archivo Municipal de Granada; Biblioteca de Andalucía	reports on agricultural production; and conciseness of authors in describing well-known non weather events, such as military and political events, plagues, famines, epidemics, eclipses and earthquakes.		seasonal five-point precipitation index: -2/2= Very dry (absence of rain together with information on drops in river and water spring levels): -2; Dry (absence of rain without additional information): -1; Normal (no news, no comments on impacts): 0; Wet (hard and/or constant rainfall): +1; Very wet (rain-induced flood): +2	precipitation index	direct observed, indirect organic	yes	i	frodrigo@ual.es	Rodrigo, Fernando S. et al. "A reconstruction of the winter North Atlantic Oscillation Index back to AD 1501 using documentary data in Southern Spain." Journal of Geophysical Research 106 (2001) : 14805-14818.; Rodrigo, Fernando S. et al. "A 500-year precipitation record in Southern Spain." International Journal of Climatology 19 (1999): 1233-1253.	x	http://stream-ucm.es/RECLIDO/en/home-en.htm
363	p	precipitation	annual	MAM	1501	1850	350	1791	1997	Andalusia	Spain	Europe	6				36	38.7	-7.5	-1.6	1	Andalusia	urban annals, city histories, religious chronicles, brief reports of events, private correspondence, and registers from church and city archives	i.a. Archivo Municipal de Granada; Biblioteca de Andalucía	reports on agricultural production; and conciseness of authors in describing well-known non weather events, such as military and political events, plagues, famines, epidemics, eclipses and earthquakes.		seasonal /annual ordinal five-point precipitation index: -2/2= extreme meteorological drought to rain-induced flooding; reconstructed precipitation anomalies	precipitation index	direct observed, indirect organic	yes	i	frodrigo@ual.es	Rodrigo, Fernando S. et al. "A reconstruction of the winter North Atlantic Oscillation Index back to AD 1501 using documentary data in Southern Spain." Journal of Geophysical Research 106 (2001) : 14805-14818.; Rodrigo, Fernando S. et al. "A 500-year precipitation record in Southern Spain." International Journal of Climatology 19 (1999): 1233-1253.	x	http://stream-ucm.es/RECLIDO/en/home-en.htm
364	p	precipitation	annual	JJA	1501	1850	350	1791	1997	Andalusia	Spain	Europe	6				36	38.7	-7.5	-1.6	1	Andalusia	urban annals, city histories, religious chronicles, brief reports of events, private correspondence, and registers from church and city archives	i.a. Archivo Municipal de Granada; Biblioteca de Andalucía	reports on agricultural production; and conciseness of authors in describing well-known non weather events, such as military and political events, plagues, famines, epidemics, eclipses and earthquakes.		seasonal /annual ordinal five-point precipitation index: -2/2= extreme meteorological drought to rain-induced flooding; reconstructed precipitation anomalies	precipitation index	direct observed, indirect organic	yes	i	frodrigo@ual.es	Rodrigo, Fernando S. et al. "A reconstruction of the winter North Atlantic Oscillation Index back to AD 1501 using documentary data in Southern Spain." Journal of Geophysical Research 106 (2001) : 14805-14818.; Rodrigo, Fernando S. et al. "A 500-year precipitation record in Southern Spain." International Journal of Climatology 19 (1999): 1233-1253.	x	http://stream-ucm.es/RECLIDO/en/home-en.htm
365	p	precipitation	annual	SON	1501	1850	350	1791	1997	Andalusia	Spain	Europe	6				36	38.7	-7.5	-1.6	1	Andalusia	urban annals, city histories, religious chronicles, brief reports of events, private correspondence, and registers from church and city archives	i.a. Archivo Municipal de Granada; Biblioteca de Andalucía	reports on agricultural production; and conciseness of authors in describing well-known non weather events, such as military and political events, plagues, famines, epidemics, eclipses and earthquakes.		seasonal /annual ordinal five-point precipitation index: -2/2= extreme meteorological drought to rain-induced flooding; reconstructed precipitation anomalies	precipitation index	direct observed, indirect organic	yes	i	frodrigo@ual.es	Rodrigo, Fernando S. et al. "A reconstruction of the winter North Atlantic Oscillation Index back to AD 1501 using documentary data in Southern Spain." Journal of Geophysical Research 106 (2001) : 14805-14818.; Rodrigo, Fernando S. et al. "A 500-year precipitation record in Southern Spain." International Journal of Climatology 19 (1999): 1233-1253.	x	http://stream-ucm.es/RECLIDO/en/home-en.htm
366	p	precipitation	annual	DJF	1521	1880	360	1813	2000	Barcelona	Spain	Europe	6	94	41.4167	2.1167					0		317 volumes for Murcia and 189 for Lorca, additionally 45 bibliographical references, records of rogation ceremonies	Municipal Historical Archive of Lorca (AHL); the Municipal Historical Archive of Murcia (AHMM); the Cathedral Chapter Archive of Murcia (ACCM);	records on rainfall regime, detailing deficits and surplus amounts leading to droughts and floods, rogation ceremonies		three-point monthly precipitation index: -1/1 = persistent or intense rainfall, floods, rogations pro serenitate; ‘normal conditions’ without information on impacts; droughts, rogations pro pluvia; seasonal (DJF, MAM) indices: -3/3; annual indices: −12/12	precipitation index	direct observed, cultural	yes	i	machado@ccma.csic.es	Rodrigo, Fernando S. and Barriendos, Mariano "Reconstruction of seasonal and annual rainfall variability in the Iberian peninsula (16th-20th centuries) from documentary data." Global and Planetary Change 63 (2008): 243-257.
367	p	precipitation	annual	MAM	1521	1880	360	1813	2000	Barcelona	Spain	Europe	6	94	41.4167	2.1167					0		317 volumes for Murcia and 189 for Lorca, additionally 45 bibliographical references, records of rogation ceremonies	Municipal Historical Archive of Lorca (AHL); the Municipal Historical Archive of Murcia (AHMM); the Cathedral Chapter Archive of Murcia (ACCM);	records on rainfall regime, detailing deficits and surplus amounts leading to droughts and floods, rogation ceremonies		three-point monthly precipitation index: -1/1 = persistent or intense rainfall, floods, rogations pro serenitate; ‘normal conditions’ without information on impacts; droughts, rogations pro pluvia; seasonal (DJF, MAM) indices: -3/3; annual indices: −12/12	precipitation index	direct observed, cultural	yes	i	machado@ccma.csic.es	Rodrigo, Fernando S. and Barriendos, Mariano "Reconstruction of seasonal and annual rainfall variability in the Iberian peninsula (16th-20th centuries) from documentary data." Global and Planetary Change 63 (2008): 243-257.
368	p	precipitation	annual	DJF	1571	1880	310	1865	2000	Bilbao	Spain	Europe	6	34	43.3	-2.9167					0		317 volumes for Murcia and 189 for Lorca, additionally 45 bibliographical references, records of rogation ceremonies	Municipal Historical Archive of Lorca (AHL); the Municipal Historical Archive of Murcia (AHMM); the Cathedral Chapter Archive of Murcia (ACCM);	records on rainfall regime, detailing deficits and surplus amounts leading to droughts and floods, rogation ceremonies		three-point monthly precipitation index: -1/1 = persistent or intense rainfall, floods, rogations pro serenitate; ‘normal conditions’ without information on impacts; droughts, rogations pro pluvia; seasonal indices: -3/3; annual indices: −12/11	precipitation index	direct observed, cultural	yes	i	machado@ccma.csic.es	Rodrigo, Fernando S. and Barriendos, Mariano "Reconstruction of seasonal and annual rainfall variability in the Iberian peninsula (16th-20th centuries) from documentary data." Global and Planetary Change 63 (2008): 243-257.
369	p	precipitation	annual	MAM	1571	1880	310	1865	2000	Bilbao	Spain	Europe	6	34	43.3	-2.9167					0		317 volumes for Murcia and 189 for Lorca, additionally 45 bibliographical references, records of rogation ceremonies	Municipal Historical Archive of Lorca (AHL); the Municipal Historical Archive of Murcia (AHMM); the Cathedral Chapter Archive of Murcia (ACCM);	records on rainfall regime, detailing deficits and surplus amounts leading to droughts and floods, rogation ceremonies		three-point monthly precipitation index: -1/1 = persistent or intense rainfall, floods, rogations pro serenitate; ‘normal conditions’ without information on impacts; droughts, rogations pro pluvia; seasonal indices: -3/3; annual indices: −12/12	precipitation index	direct observed, cultural	yes	i	machado@ccma.csic.es	Rodrigo, Fernando S. and Barriendos, Mariano "Reconstruction of seasonal and annual rainfall variability in the Iberian peninsula (16th-20th centuries) from documentary data." Global and Planetary Change 63 (2008): 243-257.
370	p	precipitation	annual	DJF	1570	1900	331	1866	2000	Murcia	Spain	Europe	6	75	37.95	1.2167					0		317 volumes for Murcia and 189 for Lorca, additionally 45 bibliographical references, records of rogation ceremonies	Municipal Historical Archive of Lorca (AHL); the Municipal Historical Archive of Murcia (AHMM); the Cathedral Chapter Archive of Murcia (ACCM);	records on rainfall regime, detailing deficits and surplus amounts leading to droughts and floods, rogation ceremonies		three-point monthly precipitation index: -1/1 = persistent or intense rainfall, floods, rogations pro serenitate; ‘normal conditions’ without information on impacts; droughts, rogations pro pluvia; seasonal (DJF, MAM, SON) indices: -3/3; annual indices: −12/12	precipitation index	direct observed, cultural	yes	i	machado@ccma.csic.es	Rodrigo, Fernando S. and Barriendos, Mariano "Reconstruction of seasonal and annual rainfall variability in the Iberian peninsula (16th-20th centuries) from documentary data." Global and Planetary Change 63 (2008): 243-257.
371	p	precipitation	annual	MAM	1570	1900	331	1866	2000	Murcia	Spain	Europe	6	75	37.95	1.2167					0		317 volumes for Murcia and 189 for Lorca, additionally 45 bibliographical references, records of rogation ceremonies	Municipal Historical Archive of Lorca (AHL); the Municipal Historical Archive of Murcia (AHMM); the Cathedral Chapter Archive of Murcia (ACCM);	records on rainfall regime, detailing deficits and surplus amounts leading to droughts and floods, rogation ceremonies		three-point monthly precipitation index: -1/1 = persistent or intense rainfall, floods, rogations pro serenitate; ‘normal conditions’ without information on impacts; droughts, rogations pro pluvia; seasonal (DJF, MAM, SON) indices: -3/3; annual indices: −12/12	precipitation index	direct observed, cultural	yes	i	machado@ccma.csic.es	Rodrigo, Fernando S. and Barriendos, Mariano "Reconstruction of seasonal and annual rainfall variability in the Iberian peninsula (16th-20th centuries) from documentary data." Global and Planetary Change 63 (2008): 243-257.
372	p	precipitation	annual	SON	1570	1900	331	1866	2000	Murcia	Spain	Europe	6	75	37.95	1.2167					0		317 volumes for Murcia and 189 for Lorca, additionally 45 bibliographical references, records of rogation ceremonies	Municipal Historical Archive of Lorca (AHL); the Municipal Historical Archive of Murcia (AHMM); the Cathedral Chapter Archive of Murcia (ACCM);	records on rainfall regime, detailing deficits and surplus amounts leading to droughts and floods, rogation ceremonies		three-point monthly precipitation index: -1/1 = persistent or intense rainfall, floods, rogations pro serenitate; ‘normal conditions’ without information on impacts; droughts, rogations pro pluvia; seasonal (DJF, MAM, SON) indices: -3/3; annual indices: −12/12	precipitation index	direct observed, cultural	yes	i	machado@ccma.csic.es	Rodrigo, Fernando S. and Barriendos, Mariano "Reconstruction of seasonal and annual rainfall variability in the Iberian peninsula (16th-20th centuries) from documentary data." Global and Planetary Change 63 (2008): 243-257.
373	p	precipitation	annual	DJF	1506	1900	395	1909	2000	Toledo	Spain	Europe	6	540	39.85	-4.016					0		317 volumes for Murcia and 189 for Lorca, additionally 45 bibliographical references, records of rogation ceremonies	Municipal Historical Archive of Lorca (AHL); the Municipal Historical Archive of Murcia (AHMM); the Cathedral Chapter Archive of Murcia (ACCM);	records on rainfall regime, detailing deficits and surplus amounts leading to droughts and floods, rogation ceremonies		three-point monthly precipitation index: -1/1 = persistent or intense rainfall, floods, rogations pro serenitate; ‘normal conditions’ without information on impacts; droughts, rogations pro pluvia; seasonal indices: -3/3; annual indices: −12/12	precipitation index	direct observed, cultural	yes	i	machado@ccma.csic.es	Rodrigo, Fernando S. and Barriendos, Mariano "Reconstruction of seasonal and annual rainfall variability in the Iberian peninsula (16th-20th centuries) from documentary data." Global and Planetary Change 63 (2008): 243-257.
374	p	precipitation	annual	MAM	1506	1900	395	1909	2000	Toledo	Spain	Europe	6	540	39.85	-4.016					0		317 volumes for Murcia and 189 for Lorca, additionally 45 bibliographical references, records of rogation ceremonies	Municipal Historical Archive of Lorca (AHL); the Municipal Historical Archive of Murcia (AHMM); the Cathedral Chapter Archive of Murcia (ACCM);	records on rainfall regime, detailing deficits and surplus amounts leading to droughts and floods, rogation ceremonies		three-point monthly precipitation index: -1/1 = persistent or intense rainfall, floods, rogations pro serenitate; ‘normal conditions’ without information on impacts; droughts, rogations pro pluvia; seasonal indices: -3/3; annual indices: −12/12	precipitation index	direct observed, cultural	yes	i	machado@ccma.csic.es	Rodrigo, Fernando S. and Barriendos, Mariano "Reconstruction of seasonal and annual rainfall variability in the Iberian peninsula (16th-20th centuries) from documentary data." Global and Planetary Change 63 (2008): 243-257.
375	p	precipitation	annual	DJF	1529	1900	372	1866	2000	Seville	Spain	Europe	6	31	37.4167	-5.883					0		317 volumes for Murcia and 189 for Lorca, additionally 45 bibliographical references, records of rogation ceremonies	Municipal Historical Archive of Lorca (AHL); the Municipal Historical Archive of Murcia (AHMM); the Cathedral Chapter Archive of Murcia (ACCM);	records on rainfall regime, detailing deficits and surplus amounts leading to droughts and floods, rogation ceremonies		three-point monthly precipitation index: -1/1 = persistent or intense rainfall, floods, rogations pro serenitate; ‘normal conditions’ without information on impacts; droughts, rogations pro pluvia; seasonal indices: -3/3; annual indices: −12/13	precipitation index	direct observed, cultural	yes	i	machado@ccma.csic.es	Rodrigo, Fernando S. and Barriendos, Mariano "Reconstruction of seasonal and annual rainfall variability in the Iberian peninsula (16th-20th centuries) from documentary data." Global and Planetary Change 63 (2008): 243-257.
376	p	precipitation	annual	MAM	1529	1900	372	1866	2000	Seville	Spain	Europe	6	31	37.4167	-5.883					0		317 volumes for Murcia and 189 for Lorca, additionally 45 bibliographical references, records of rogation ceremonies	Municipal Historical Archive of Lorca (AHL); the Municipal Historical Archive of Murcia (AHMM); the Cathedral Chapter Archive of Murcia (ACCM);	records on rainfall regime, detailing deficits and surplus amounts leading to droughts and floods, rogation ceremonies		three-point monthly precipitation index: -1/1 = persistent or intense rainfall, floods, rogations pro serenitate; ‘normal conditions’ without information on impacts; droughts, rogations pro pluvia; seasonal indices: -3/3; annual indices: −12/13	precipitation index	direct observed, cultural	yes	i	machado@ccma.csic.es	Rodrigo, Fernando S. and Barriendos, Mariano "Reconstruction of seasonal and annual rainfall variability in the Iberian peninsula (16th-20th centuries) from documentary data." Global and Planetary Change 63 (2008): 243-257.
377	p	precipitation	annual	DJF	1586	1860	275	1910	2000	Zamora	Spain	Europe	6	667	41.483	-5.75					0		317 volumes for Murcia and 189 for Lorca, additionally 45 bibliographical references, records of rogation ceremonies	Municipal Historical Archive of Lorca (AHL); the Municipal Historical Archive of Murcia (AHMM); the Cathedral Chapter Archive of Murcia (ACCM);	records on rainfall regime, detailing deficits and surplus amounts leading to droughts and floods, rogation ceremonies		three-point monthly precipitation index: -1/1 = persistent or intense rainfall, floods, rogations pro serenitate; ‘normal conditions’ without information on impacts; droughts, rogations pro pluvia; seasonal indices: -3/3; annual indices: −12/14	precipitation index	direct observed, cultural	yes	i	machado@ccma.csic.es	Rodrigo, Fernando S. and Barriendos, Mariano "Reconstruction of seasonal and annual rainfall variability in the Iberian peninsula (16th-20th centuries) from documentary data." Global and Planetary Change 63 (2008): 243-257.
378	p	precipitation	annual	MAM	1586	1860	275	1910	2000	Zamora	Spain	Europe	6	667	41.483	-5.75					0		317 volumes for Murcia and 189 for Lorca, additionally 45 bibliographical references, records of rogation ceremonies	Municipal Historical Archive of Lorca (AHL); the Municipal Historical Archive of Murcia (AHMM); the Cathedral Chapter Archive of Murcia (ACCM);	records on rainfall regime, detailing deficits and surplus amounts leading to droughts and floods, rogation ceremonies		three-point monthly precipitation index: -1/1 = persistent or intense rainfall, floods, rogations pro serenitate; ‘normal conditions’ without information on impacts; droughts, rogations pro pluvia; seasonal indices: -3/3; annual indices: −12/14	precipitation index	direct observed, cultural	yes	i	machado@ccma.csic.es	Rodrigo, Fernando S. and Barriendos, Mariano "Reconstruction of seasonal and annual rainfall variability in the Iberian peninsula (16th-20th centuries) from documentary data." Global and Planetary Change 63 (2008): 243-257.
379	p	precipitation	annual		1401	1881	481			Catalonia	Spain	Europe	6				40.8126	42.3576	0.5214	2.8214	1	Tortosa, Seu d'Urgell, Girona	private, administrative (local government documents) and ecclesiastical (administrative papers, land use records, fiscal documents, or books of minutes from parishes, monasteries, cathedrals or dioceses) sources	19 archives in Girona, Barcelona, Reus/Tarragona, Tortosa, Seu d'Urgell, Vic, Cervera	records of "pro pluvia" rogation ceremonies; 5 different types of rogation ceremonies = intensities of the droughts		Drought Rogation Index (DRI): 1-5= low, medium, high, very high, critical	precipitation index	cultural	yes	i	jmartinvide@ub.edu	Martín-Vide, Javier. and Vallvé, Mariano Barriendos "The use of rogation ceremony records in climatic reconstruction: a case study from Catalonia (Spain)." Climatic Change 30 (1995): 201.
380	t	temperature	monthly		1750	1840	91			Zafra	Spain	Europe	6		38.4225	-6.4157					1	Zafra	weekly weather descriptions (correspondence of the Duke of Feria)	Municipal Archive of Zafra	quasi-weekly information about rainfall, temperature, and some weather events as snowfalls, hail, frost, and storms		monthly three-point ordinal temperature index: -1/1= colder than usual, normal, warmer than usual	temperature index	direct observed	yes	i	jvaquero@unex.es	Fernández-Fernández, Maria Isabel et al. "The climate in Zafra from 1750 to 1840: precipitation." Climatic Change 129 (2015): 267–280; Fernández-Fernández, Maria Isabel et al. "The climate in Zafra from 1750 to 1840: temperature indexes from documentary sources." Climatic Change 141 (2017): 671–684.	x	https://docs.google.com/viewer?a=v&pid=sites&srcid=ZGVmYXVsdGRvbWFpbnxqbXZhcXVlcm9ob21lcGFnZXxneDoyM2VhY2YyOTBkMGZkOTA3
381	p	precipitation	monthly		1750	1840	91			Zafra	Spain	Europe	6		38.4225	-6.4157					1	Zafra	weekly weather descriptions (correspondence of the Duke of Feria)	Municipal Archive of Zafra	quasi-weekly information about rainfall, temperature, and some weather events as snowfalls, hail, frost, and storms		monthly precipitation index: 0/1= absence of rain, rain	precipitation index	direct observed	yes	i	jvaquero@unex.es	Fernández-Fernández, Maria Isabel et al. "The climate in Zafra from 1750 to 1840: precipitation." Climatic Change 129 (2015): 267–280; Fernández-Fernández, Maria Isabel et al. "The climate in Zafra from 1750 to 1840: temperature indexes from documentary sources." Climatic Change 141 (2017): 671–684.	x	https://docs.google.com/viewer?a=v&pid=sites&srcid=ZGVmYXVsdGRvbWFpbnxqbXZhcXVlcm9ob21lcGFnZXxneDoyM2VhY2YyOTBkMGZkOTA3
382	t	temperature	annual	DJF	1500	1800	301	1654	2008	Westerm Mediterranean Basin (Barcelona, Cadiz, France, Northern-Central Italy, Southern Italy)	Spain, France, Italy	Europe	6				35	50	-10	25	0		narrative (as chronicles, annals, diaries, early scientific treatises, poems, correspondence, and compilations of remarkable events,); administrative (written by public officers usually to discuss a specific problem, its impact and the course of action) and daily weather logs (authors with a scientific background)	public and private libraries and archives	extreme events (heat, cold, flood, drought...), harvest, loss, death....		reconstructed seasonal temperature anomalies based on seven-point ordinal temperature index: -3/3 = extremely severe cold, severe cold, cold, normal, warm, hot, extremely hot	temperature reconstruction	direct observed	yes	r	d.camuffo@isac.cnr.it	Camuffo, Dario et al. “500-Year Temperature Reconstruction in the Mediterranean Basin by Means of Documentary Data and Instrumental Observations.” Climatic Change 101 (2010): 169–99.; Camuffo, Dario et al. “Climate change in the Mediterranean over the last five hundred years." In Carayannis EG (ed) Planet earth 2011 – global warming challenges and opportunities for policy and practice, InTech: Ri…	x	will be published in Documentary Proxy Dataset, for now contact angela-maria.burgdorf@giub.unibe.ch
383	t	temperature	annual	MAM	1500	1800	301	1654	2008	Westerm Mediterranean Basin (Barcelona, Cadiz, France, Northern-Central Italy, Southern Italy)	Spain, France, Italy	Europe	6				35	50	-10	25	0		narrative (as chronicles, annals, diaries, early scientific treatises, poems, correspondence, and compilations of remarkable events,); administrative (written by public officers usually to discuss a specific problem, its impact and the course of action) and daily weather logs (authors with a scientific background)	public and private libraries and archives	extreme events (heat, cold, flood, drought...), harvest, loss, death....		reconstructed seasonal temperature anomalies based on seven-point ordinal temperature index: -3/3 = extremely severe cold, severe cold, cold, normal, warm, hot, extremely hot	temperature reconstruction	direct observed	yes	r	d.camuffo@isac.cnr.it	Camuffo, Dario et al. “500-Year Temperature Reconstruction in the Mediterranean Basin by Means of Documentary Data and Instrumental Observations.” Climatic Change 101 (2010): 169–99.; Camuffo, Dario et al. “Climate change in the Mediterranean over the last five hundred years." In Carayannis EG (ed) Planet earth 2011 – global warming challenges and opportunities for policy and practice, InTech: Ri…	x	will be published in Documentary Proxy Dataset, for now contact angela-maria.burgdorf@giub.unibe.ch
384	t	temperature	annual	JJA	1500	1800	301	1654	2008	Westerm Mediterranean Basin (Barcelona, Cadiz, France, Northern-Central Italy, Southern Italy)	Spain, France, Italy	Europe	6				35	50	-10	25	0		narrative (as chronicles, annals, diaries, early scientific treatises, poems, correspondence, and compilations of remarkable events,); administrative (written by public officers usually to discuss a specific problem, its impact and the course of action) and daily weather logs (authors with a scientific background)	public and private libraries and archives	extreme events (heat, cold, flood, drought...), harvest, loss, death....		reconstructed seasonal temperature anomalies based on seven-point ordinal temperature index: -3/3 = extremely severe cold, severe cold, cold, normal, warm, hot, extremely hot	temperature reconstruction	direct observed	yes	r	d.camuffo@isac.cnr.it	Camuffo, Dario et al. “500-Year Temperature Reconstruction in the Mediterranean Basin by Means of Documentary Data and Instrumental Observations.” Climatic Change 101 (2010): 169–99.; Camuffo, Dario et al. “Climate change in the Mediterranean over the last five hundred years." In Carayannis EG (ed) Planet earth 2011 – global warming challenges and opportunities for policy and practice, InTech: Ri…	x	will be published in Documentary Proxy Dataset, for now contact angela-maria.burgdorf@giub.unibe.ch
385	t	temperature	annual	SON	1500	1800	301	1654	2008	Westerm Mediterranean Basin (Barcelona, Cadiz, France, Northern-Central Italy, Southern Italy)	Spain, France, Italy	Europe	6				35	50	-10	25	0		narrative (as chronicles, annals, diaries, early scientific treatises, poems, correspondence, and compilations of remarkable events,); administrative (written by public officers usually to discuss a specific problem, its impact and the course of action) and daily weather logs (authors with a scientific background)	public and private libraries and archives	extreme events (heat, cold, flood, drought...), harvest, loss, death....		reconstructed seasonal temperature anomalies based on seven-point ordinal temperature index: -3/3 = extremely severe cold, severe cold, cold, normal, warm, hot, extremely hot	temperature reconstruction	direct observed	yes	r	d.camuffo@isac.cnr.it	Camuffo, Dario et al. “500-Year Temperature Reconstruction in the Mediterranean Basin by Means of Documentary Data and Instrumental Observations.” Climatic Change 101 (2010): 169–99.; Camuffo, Dario et al. “Climate change in the Mediterranean over the last five hundred years." In Carayannis EG (ed) Planet earth 2011 – global warming challenges and opportunities for policy and practice, InTech: Ri…	x	will be published in Documentary Proxy Dataset, for now contact angela-maria.burgdorf@giub.unibe.ch
386	p	precipitation	annual	DJF	1500	1800	301	1654	2008	Westerm Mediterranean Basin (Barcelona, Cadiz, France, Northern-Central Italy, Southern Italy)	Spain, France, Italy	Europe	6				35	50	-10	25	0		narrative (as chronicles, annals, diaries, early scientific treatises, poems, correspondence, and compilations of remarkable events,); administrative (written by public officers usually to discuss a specific problem, its impact and the course of action) and daily weather logs (authors with a scientific background)	public and private libraries and archives	extreme events (heat, cold, flood, drought...), harvest, loss, death....		reconstructed seasonal precipitation anomalies based on seven-point ordinal precipitation index: -3/3 = extremely severe cold, severe cold, cold, normal, warm, hot, extremely hot	precipitation reconstruction	direct observed	yes	r	d.camuffo@isac.cnr.it	Camuffo, Dario et al. “Climate change in the Mediterranean over the last five hundred years." In Carayannis EG (ed) Planet earth 2011 – global warming challenges and opportunities for policy and practice. InTech: Rijeka, 2011	x	will be published in Documentary Proxy Dataset, for now contact angela-maria.burgdorf@giub.unibe.ch
387	p	precipitation	annual	MAM	1500	1800	301	1654	2008	Westerm Mediterranean Basin (Barcelona, Cadiz, France, Northern-Central Italy, Southern Italy)	Spain, France, Italy	Europe	6				35	50	-10	25	0		narrative (as chronicles, annals, diaries, early scientific treatises, poems, correspondence, and compilations of remarkable events,); administrative (written by public officers usually to discuss a specific problem, its impact and the course of action) and daily weather logs (authors with a scientific background)	public and private libraries and archives	extreme events (heat, cold, flood, drought...), harvest, loss, death....		reconstructed seasonal precipitation anomalies based on seven-point ordinal precipitation index: -3/3 = extremely severe cold, severe cold, cold, normal, warm, hot, extremely hot	precipitation reconstruction	direct observed	yes	r	d.camuffo@isac.cnr.it	Camuffo, Dario et al. “Climate change in the Mediterranean over the last five hundred years." In Carayannis EG (ed) Planet earth 2011 – global warming challenges and opportunities for policy and practice. InTech: Rijeka, 2011	x	will be published in Documentary Proxy Dataset, for now contact angela-maria.burgdorf@giub.unibe.ch
388	p	precipitation	annual	JJA	1500	1800	301	1654	2008	Westerm Mediterranean Basin (Barcelona, Cadiz, France, Northern-Central Italy, Southern Italy)	Spain, France, Italy	Europe	6				35	50	-10	25	0		narrative (as chronicles, annals, diaries, early scientific treatises, poems, correspondence, and compilations of remarkable events,); administrative (written by public officers usually to discuss a specific problem, its impact and the course of action) and daily weather logs (authors with a scientific background)	public and private libraries and archives	extreme events (heat, cold, flood, drought...), harvest, loss, death....		reconstructed seasonal precipitation anomalies based on seven-point ordinal precipitation index: -3/3 = extremely severe cold, severe cold, cold, normal, warm, hot, extremely hot	precipitation reconstruction	direct observed	yes	r	d.camuffo@isac.cnr.it	Camuffo, Dario et al. “Climate change in the Mediterranean over the last five hundred years." In Carayannis EG (ed) Planet earth 2011 – global warming challenges and opportunities for policy and practice. InTech: Rijeka, 2011	x	will be published in Documentary Proxy Dataset, for now contact angela-maria.burgdorf@giub.unibe.ch
389	p	precipitation	annual	SON	1500	1800	301	1654	2008	Westerm Mediterranean Basin (Barcelona, Cadiz, France, Northern-Central Italy, Southern Italy)	Spain, France, Italy	Europe	6				35	50	-10	25	0		narrative (as chronicles, annals, diaries, early scientific treatises, poems, correspondence, and compilations of remarkable events,); administrative (written by public officers usually to discuss a specific problem, its impact and the course of action) and daily weather logs (authors with a scientific background)	public and private libraries and archives	extreme events (heat, cold, flood, drought...), harvest, loss, death....		reconstructed seasonal precipitation anomalies based on seven-point ordinal precipitation index: -3/3 = extremely severe cold, severe cold, cold, normal, warm, hot, extremely hot	precipitation reconstruction	direct observed	yes	r	d.camuffo@isac.cnr.it	Camuffo, Dario et al. “Climate change in the Mediterranean over the last five hundred years." In Carayannis EG (ed) Planet earth 2011 – global warming challenges and opportunities for policy and practice. InTech: Rijeka, 2011	x	will be published in Documentary Proxy Dataset, for now contact angela-maria.burgdorf@giub.unibe.ch
390	t	temperature	annual	DJF	1500	1800	301	1654	2008	Northern Italy	Italy	Europe	6				43	46	8	13	2	based on graph in article	narrative (as chronicles, annals, diaries, early scientific treatises, poems, correspondence, and compilations of remarkable events,); administrative (written by public officers usually to discuss a specific problem, its impact and the course of action) and daily weather logs (authors with a scientific background)	public and private libraries and archives	extreme events (heat, cold, flood, drought...), harvest, loss, death....		reconstructed seasonal temperature anomalies based on seven-point ordinal temperature index: -3/3 = extremely severe cold, severe cold, cold, normal, warm, hot, extremely hot	temperature reconstruction	direct observed	yes	r	d.camuffo@isac.cnr.it	Camuffo, Dario et al. “500-Year Temperature Reconstruction in the Mediterranean Basin by Means of Documentary Data and Instrumental Observations.” Climatic Change 101 (2010): 169–99.; Camuffo, Dario et al. “Climate change in the Mediterranean over the last five hundred years." In Carayannis EG (ed) Planet earth 2011 – global warming challenges and opportunities for policy and practice, InTech: Ri…	x	will be published in Documentary Proxy Dataset, for now contact angela-maria.burgdorf@giub.unibe.ch
391	t	temperature	annual	MAM	1500	1800	301	1654	2008	Northern Italy	Italy	Europe	6				43	46	8	13	2	based on graph in article	narrative (as chronicles, annals, diaries, early scientific treatises, poems, correspondence, and compilations of remarkable events,); administrative (written by public officers usually to discuss a specific problem, its impact and the course of action) and daily weather logs (authors with a scientific background)	public and private libraries and archives	extreme events (heat, cold, flood, drought...), harvest, loss, death....		reconstructed seasonal temperature anomalies based on seven-point ordinal temperature index: -3/3 = extremely severe cold, severe cold, cold, normal, warm, hot, extremely hot	temperature reconstruction	direct observed	yes	r	d.camuffo@isac.cnr.it	Camuffo, Dario et al. “500-Year Temperature Reconstruction in the Mediterranean Basin by Means of Documentary Data and Instrumental Observations.” Climatic Change 101 (2010): 169–99.; Camuffo, Dario et al. “Climate change in the Mediterranean over the last five hundred years." In Carayannis EG (ed) Planet earth 2011 – global warming challenges and opportunities for policy and practice, InTech: Ri…	x	will be published in Documentary Proxy Dataset, for now contact angela-maria.burgdorf@giub.unibe.ch
392	t	temperature	annual	JJA	1500	1800	301	1654	2008	Northern Italy	Italy	Europe	6				43	46	8	13	2	based on graph in article	narrative (as chronicles, annals, diaries, early scientific treatises, poems, correspondence, and compilations of remarkable events,); administrative (written by public officers usually to discuss a specific problem, its impact and the course of action) and daily weather logs (authors with a scientific background)	public and private libraries and archives	extreme events (heat, cold, flood, drought...), harvest, loss, death....		reconstructed seasonal temperature anomalies based on seven-point ordinal temperature index: -3/3 = extremely severe cold, severe cold, cold, normal, warm, hot, extremely hot	temperature reconstruction	direct observed	yes	r	d.camuffo@isac.cnr.it	Camuffo, Dario et al. “500-Year Temperature Reconstruction in the Mediterranean Basin by Means of Documentary Data and Instrumental Observations.” Climatic Change 101 (2010): 169–99.; Camuffo, Dario et al. “Climate change in the Mediterranean over the last five hundred years." In Carayannis EG (ed) Planet earth 2011 – global warming challenges and opportunities for policy and practice, InTech: Ri…	x	will be published in Documentary Proxy Dataset, for now contact angela-maria.burgdorf@giub.unibe.ch
393	t	temperature	annual	SON	1500	1800	301	1654	2008	Northern Italy	Italy	Europe	6				43	46	8	13	2	based on graph in article	narrative (as chronicles, annals, diaries, early scientific treatises, poems, correspondence, and compilations of remarkable events,); administrative (written by public officers usually to discuss a specific problem, its impact and the course of action) and daily weather logs (authors with a scientific background)	public and private libraries and archives	extreme events (heat, cold, flood, drought...), harvest, loss, death....		reconstructed seasonal temperature anomalies based on seven-point ordinal temperature index: -3/3 = extremely severe cold, severe cold, cold, normal, warm, hot, extremely hot	temperature reconstruction	direct observed	yes	r	d.camuffo@isac.cnr.it	Camuffo, Dario et al. “500-Year Temperature Reconstruction in the Mediterranean Basin by Means of Documentary Data and Instrumental Observations.” Climatic Change 101 (2010): 169–99.; Camuffo, Dario et al. “Climate change in the Mediterranean over the last five hundred years." In Carayannis EG (ed) Planet earth 2011 – global warming challenges and opportunities for policy and practice, InTech: Ri…	x	will be published in Documentary Proxy Dataset, for now contact angela-maria.burgdorf@giub.unibe.ch
394	p	precipitation	annual	DJF	1500	1780	281	1654	2008	Northern Italy	Italy	Europe	6				43	46	8	13	2	based on graph in article	narrative (as chronicles, annals, diaries, early scientific treatises, poems, correspondence, and compilations of remarkable events,); administrative (written by public officers usually to discuss a specific problem, its impact and the course of action) and daily weather logs (authors with a scientific background)	public and private libraries and archives	extreme events (heat, cold, flood, drought...), harvest, loss, death....		reconstructed seasonal precipitation anomalies based on seven-point ordinal precipitation index: -3/3 = extremely severe cold, severe cold, cold, normal, warm, hot, extremely hot	precipitation reconstruction	direct observed	yes	r	d.camuffo@isac.cnr.it	Camuffo, Dario et al. “Climate change in the Mediterranean over the last five hundred years." In Carayannis EG (ed) Planet earth 2011 – global warming challenges and opportunities for policy and practice. InTech: Rijeka, 2011	x	will be published in Documentary Proxy Dataset, for now contact angela-maria.burgdorf@giub.unibe.ch
395	p	precipitation	annual	MAM	1500	1780	281	1654	2008	Northern Italy	Italy	Europe	6				43	46	8	13	2	based on graph in article	narrative (as chronicles, annals, diaries, early scientific treatises, poems, correspondence, and compilations of remarkable events,); administrative (written by public officers usually to discuss a specific problem, its impact and the course of action) and daily weather logs (authors with a scientific background)	public and private libraries and archives	extreme events (heat, cold, flood, drought...), harvest, loss, death....		reconstructed seasonal precipitation anomalies based on seven-point ordinal precipitation index: -3/3 = extremely severe cold, severe cold, cold, normal, warm, hot, extremely hot	precipitation reconstruction	direct observed	yes	r	d.camuffo@isac.cnr.it	Camuffo, Dario et al. “Climate change in the Mediterranean over the last five hundred years." In Carayannis EG (ed) Planet earth 2011 – global warming challenges and opportunities for policy and practice. InTech: Rijeka, 2011	x	will be published in Documentary Proxy Dataset, for now contact angela-maria.burgdorf@giub.unibe.ch
396	p	precipitation	annual	JJA	1500	1780	281	1654	2008	Northern Italy	Italy	Europe	6				43	46	8	13	2	based on graph in article	narrative (as chronicles, annals, diaries, early scientific treatises, poems, correspondence, and compilations of remarkable events,); administrative (written by public officers usually to discuss a specific problem, its impact and the course of action) and daily weather logs (authors with a scientific background)	public and private libraries and archives	extreme events (heat, cold, flood, drought...), harvest, loss, death....		reconstructed seasonal precipitation anomalies based on seven-point ordinal precipitation index: -3/3 = extremely severe cold, severe cold, cold, normal, warm, hot, extremely hot	precipitation reconstruction	direct observed	yes	r	d.camuffo@isac.cnr.it	Camuffo, Dario et al. “Climate change in the Mediterranean over the last five hundred years." In Carayannis EG (ed) Planet earth 2011 – global warming challenges and opportunities for policy and practice. InTech: Rijeka, 2011	x	will be published in Documentary Proxy Dataset, for now contact angela-maria.burgdorf@giub.unibe.ch
397	p	precipitation	annual	SON	1500	1780	281	1654	2008	Northern Italy	Italy	Europe	6				43	46	8	13	2	based on graph in article	narrative (as chronicles, annals, diaries, early scientific treatises, poems, correspondence, and compilations of remarkable events,); administrative (written by public officers usually to discuss a specific problem, its impact and the course of action) and daily weather logs (authors with a scientific background)	public and private libraries and archives	extreme events (heat, cold, flood, drought...), harvest, loss, death....		reconstructed seasonal precipitation anomalies based on seven-point ordinal precipitation index: -3/3 = extremely severe cold, severe cold, cold, normal, warm, hot, extremely hot	precipitation reconstruction	direct observed	yes	r	d.camuffo@isac.cnr.it	Camuffo, Dario et al. “Climate change in the Mediterranean over the last five hundred years." In Carayannis EG (ed) Planet earth 2011 – global warming challenges and opportunities for policy and practice. InTech: Rijeka, 2011	x	will be published in Documentary Proxy Dataset, for now contact angela-maria.burgdorf@giub.unibe.ch
398	p	precipitation	annual		1595	1836	242			Canary Islands	Spain	Europe	6				27.6167	29.4167	-18.167	-13.167	0		libro del pan (main account book for cereals), chronicles, newspapers, etc.	Gran Canarian's cathedral archives	harvest related records	harvest taxes (tithes), references to floods and drought; 2 independent dry and wet years series are used to asses the precip signal (Herrera 1979)	Canary Islands precipitation proxy (CPP): computed as the averaged and standardized wheat and barley productions for the archipelago	precipitation index	direct observed, indirect organic	yes	i	rgarcia@6000aire.fis.ucm.es	García, Ricardo et al."Reconstruction of the precipitation in the Canary Islands for the period 1595-1836." Bulletin of the American Meteorological Society 84 (2003).	x	http://stream-ucm.es/RECLIDO/es/basesdatos/proxy_canarias.txt
399	p	precipitation	annual	DJF	1548	1648	101			Crete	Greece	Europe	6		35.24	24.8093					1	Crete	letters and reports of venetian rule: e.g. correspondence of the Provveditori Generali, dispatches sent to Venice by the Rectors of the four provinces, or territories of Crete	Archivio di Stato, Venice; Archivio di S. Maria della Catena, Palermo; Biblioteca del Museo civico Correr, Venice; Turkish Archives, Heraklion	harvest related records	crops grown, harvest conditions, food availability, administrative and military matters,Crops, sirica (some kind of plant disease), plague and famine	drought chronologies and severity of impact	drought chronology	direct observed, indirect organic	yes	ts		Grove, Jean, and Annalisa Conterio. “The Climate of Crete in the Sixteenth and Seventeenth Centuries.” Climatic Change 30 (1995): 223–47.
400	p	precipitation	annual	MAM	1548	1648	101			Crete	Greece	Europe	6		35.24	24.8093					1	Crete	letters and reports of venetian rule: e.g. correspondence of the Provveditori Generali, dispatches sent to Venice by the Rectors of the four provinces, or territories of Crete	Archivio di Stato, Venice; Archivio di S. Maria della Catena, Palermo; Biblioteca del Museo civico Correr, Venice; Turkish Archives, Heraklion	harvest related records	crops grown, harvest conditions, food availability, administrative and military matters,Crops, sirica (some kind of plant disease), plague and famine	drought chronologies and severity of impact	drought chronology	direct observed, indirect organic	yes	ts		Grove, Jean, and Annalisa Conterio. “The Climate of Crete in the Sixteenth and Seventeenth Centuries.” Climatic Change 30 (1995): 223–47.
401	p	precipitation	annual	JJA	1548	1648	101			Crete	Greece	Europe	6		35.24	24.8093					1	Crete	letters and reports of venetian rule: e.g. correspondence of the Provveditori Generali, dispatches sent to Venice by the Rectors of the four provinces, or territories of Crete	Archivio di Stato, Venice; Archivio di S. Maria della Catena, Palermo; Biblioteca del Museo civico Correr, Venice; Turkish Archives, Heraklion	harvest related records	crops grown, harvest conditions, food availability, administrative and military matters,Crops, sirica (some kind of plant disease), plague and famine	drought chronologies and severity of impact	drought chronology	direct observed, indirect organic	yes	ts		Grove, Jean, and Annalisa Conterio. “The Climate of Crete in the Sixteenth and Seventeenth Centuries.” Climatic Change 30 (1995): 223–47.
402	p	precipitation	annual	SON	1548	1648	101			Crete	Greece	Europe	6		35.24	24.8093					1	Crete	letters and reports of venetian rule: e.g. correspondence of the Provveditori Generali, dispatches sent to Venice by the Rectors of the four provinces, or territories of Crete	Archivio di Stato, Venice; Archivio di S. Maria della Catena, Palermo; Biblioteca del Museo civico Correr, Venice; Turkish Archives, Heraklion	harvest related records	crops grown, harvest conditions, food availability, administrative and military matters,Crops, sirica (some kind of plant disease), plague and famine	drought chronologies and severity of impact	drought chronology	direct observed, indirect organic	yes	ts		Grove, Jean, and Annalisa Conterio. “The Climate of Crete in the Sixteenth and Seventeenth Centuries.” Climatic Change 30 (1995): 223–47.
403	p	precipitation	annual		1750	1850	101			North-eastern coast region (Gerona, Barcelona, Tarragona, Tortosa)	Spain	Europe	6				36	44	-10	4	2	based on graph in paper	City Council Acts, Local Histories, Chapter Acts, Cathedral accounts, Private Diaries, Kingdom’s chronicles	Townhall archive; Cathedral archive; Country archive; Kingdom's archive; Departamental archive, Bishopric archive; Basilica of Our Lady of the Pillar archive; Convent of Santa Clara archive; Basilica of Candelaria archive; Archivo Catedralicio y Diocesano de Catedral de Calahorra; Archivo de la Santa Iglesia-Catedral de Teruel; Zafra City Archives; Nuestra Señora de la Candelaria Archives; Santa …	rogation ceremony records	16 rogation series (pro pluvia, pro serenitate or pro remissione) --> proxy for agrarian droughts; 3 instrumental precipitation series: Barcelona (1780-) , Gibraltar (1719-), Cadiz (1805-); 2 regions: North-eastern coast region (Gerona, Barcelona, Tarragona, Tortosa), South-western region (Seville, Zafra)	seasonal (winter, spring, summer, fall), annual frequency of rogation ceremonies	rogation frequency time series	cultural	yes	ts	f.dominguez@gmail.com	Domínguez-Castro, Fernando et al. "Assessing extreme droughts in Spain during 1750–1850 from rogation ceremonies." Climate of the Past 8 (2012): 705–722.; Domínguez-Castro, Fernando et al. "A shift in the spatial pattern of Iberian droughts during the 17th century." Climate of the Past 6 (2010): 553–563.	*	http://inpro.unizar.es/
404	p	precipitation	annual		1750	1850	101			South-western region (Seville, Zafra)	Spain	Europe	6				36	44	-10	4	2	based on graph in paper	City Council Acts, Local Histories, Chapter Acts, Cathedral accounts, Private Diaries, Kingdom’s chronicles	Townhall archive; Cathedral archive; Country archive; Kingdom's archive; Departamental archive, Bishopric archive; Basilica of Our Lady of the Pillar archive; Convent of Santa Clara archive; Basilica of Candelaria archive; Archivo Catedralicio y Diocesano de Catedral de Calahorra; Archivo de la Santa Iglesia-Catedral de Teruel; Zafra City Archives; Nuestra Señora de la Candelaria Archives; Santa …	rogation ceremony records	16 rogation series (pro pluvia, pro serenitate or pro remissione) --> proxy for agrarian droughts; 3 instrumental precipitation series: Barcelona (1780-) , Gibraltar (1719-), Cadiz (1805-); 2 regions: North-eastern coast region (Gerona, Barcelona, Tarragona, Tortosa), South-western region (Seville, Zafra)	seasonal (winter, spring, summer, fall), annual frequency of rogation ceremonies	rogation frequency time series	cultural	yes	ts	f.dominguez@gmail.com	Domínguez-Castro, Fernando et al. "Assessing extreme droughts in Spain during 1750–1850 from rogation ceremonies." Climate of the Past 8 (2012): 705–722.; Domínguez-Castro, Fernando et al. "A shift in the spatial pattern of Iberian droughts during the 17th century." Climate of the Past 6 (2010): 553–563.	*	http://inpro.unizar.es/
[truncated: 284 more rows]
